# Supplementary material for: BEXCIS: Bayesian methods for estimating the degree of the skewness of X chromosome inactivation
Source: Springer Nature journal article supplement (doi:10.1186/s12859-022-04721-y), 2022-05-24
Supplement: 12859_2022_4721_MOESM1_ESM.pdf [file 12859_2022_4721_MOESM1_ESM.pdf]

# Additional file 1: Supplementary Figures S1–S22

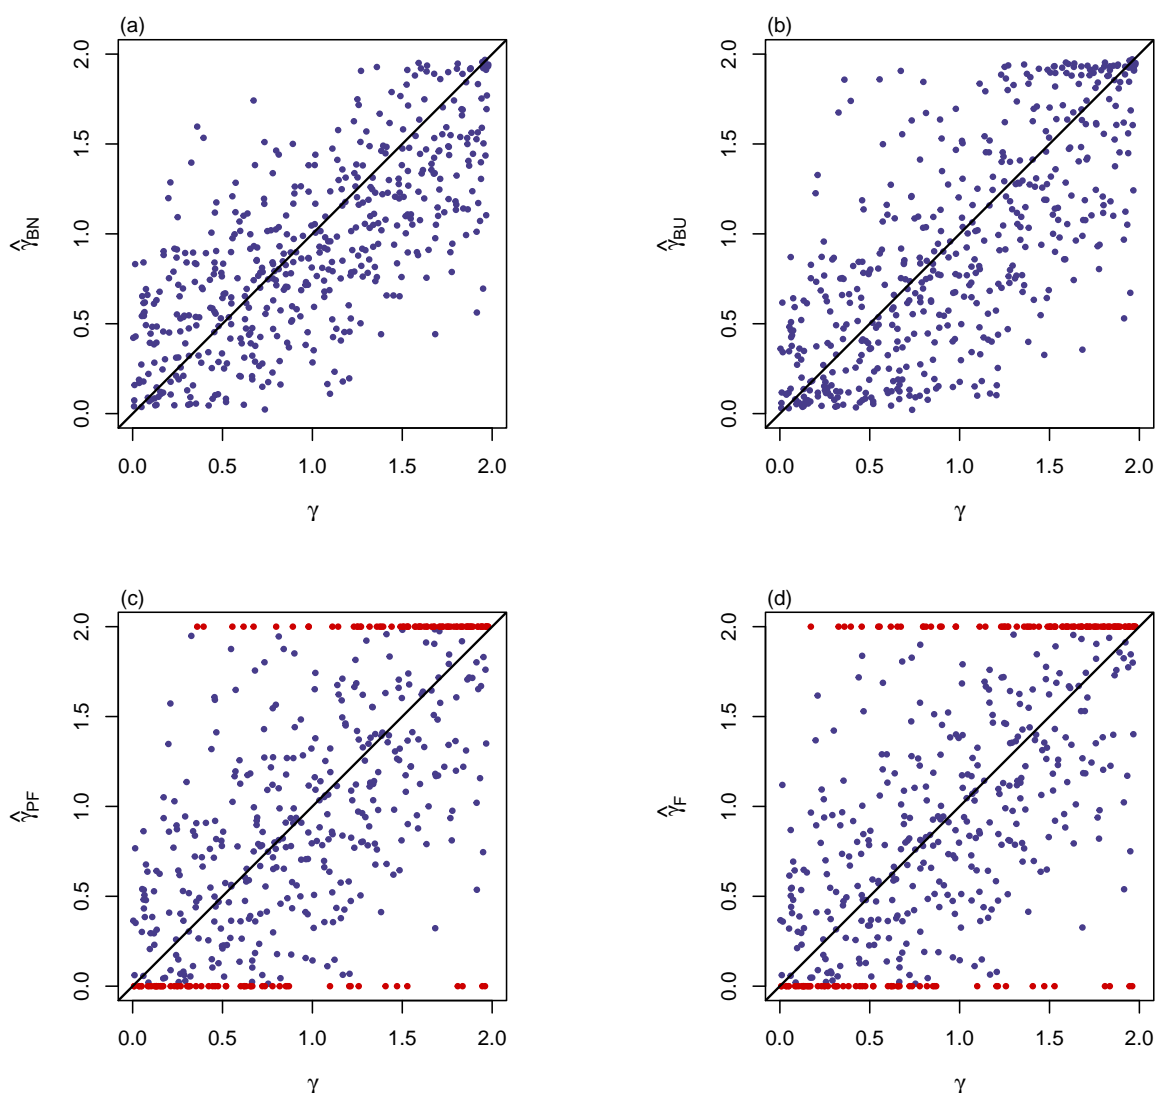

**Supplementary Figure S1** Scatter plots of point estimates of  $\gamma$  against true value of  $\gamma$  for qualitative trait with  $n = 500$ ,  $MAF = 0.3$  and  $\rho = -0.05$ . The red points represent the extreme values (0 or 2). **(a)**  $\hat{\gamma}_{BN}$ ; **(b)**  $\hat{\gamma}_{BU}$ ; **(c)**  $\hat{\gamma}_{PF}$ ; **(d)**  $\hat{\gamma}_F$

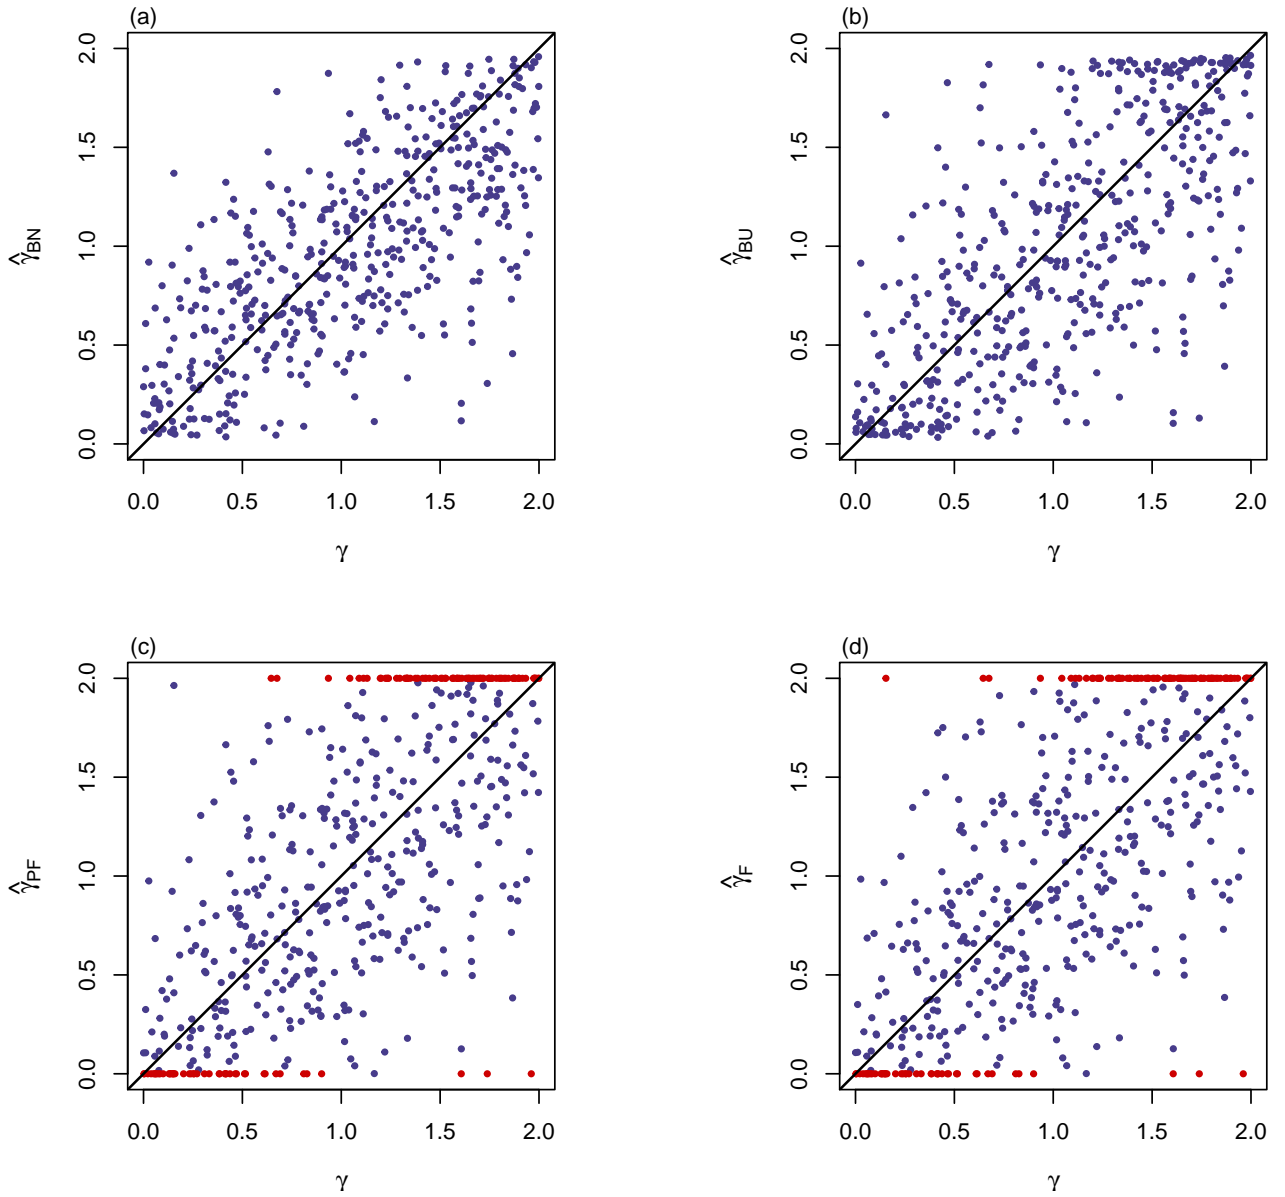

**Supplementary Figure S2** Scatter plots of point estimates of  $\gamma$  are against true value of  $\gamma$  for qualitative trait with  $n = 500$ ,  $MAF = 0.3$  and  $\rho = 0.05$ . The red points represent the extreme values (0 or 2). **(a)**  $\hat{\gamma}_{BN}$ ; **(b)**  $\hat{\gamma}_{BU}$ ; **(c)**  $\hat{\gamma}_{PF}$ ; **(d)**  $\hat{\gamma}_F$

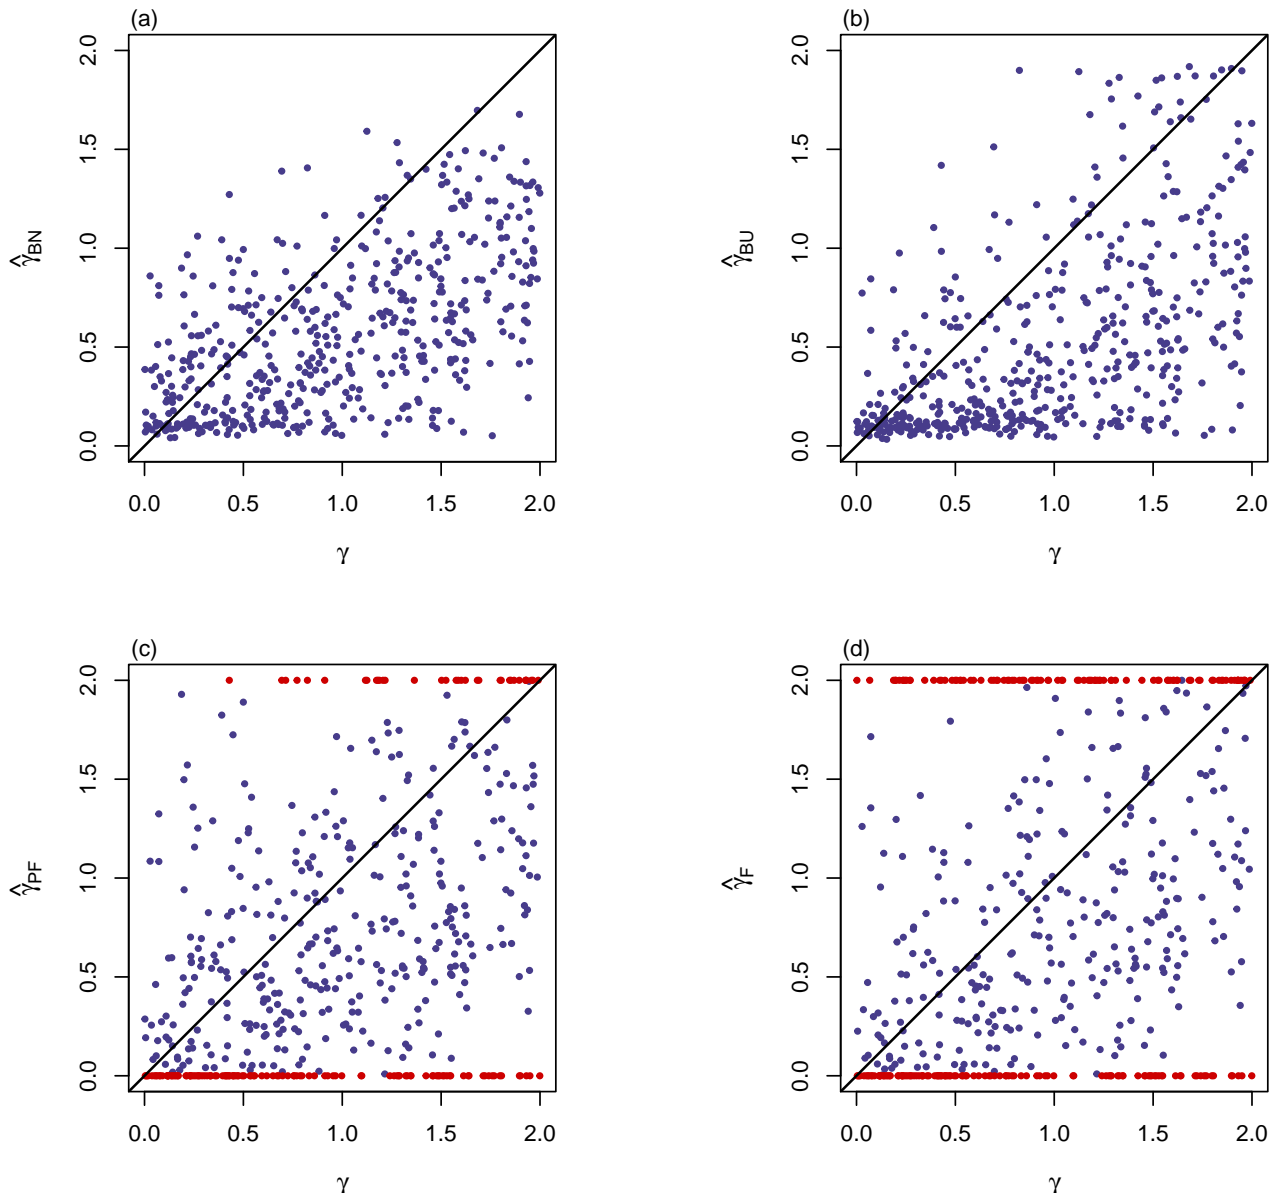

**Supplementary Figure S3** Scatter plots of point estimates of  $\gamma$  against true value of  $\gamma$  for qualitative trait with  $n = 500$ ,  $\text{MAF} = 0.1$  and  $\rho = 0$ . The red points represent the extreme values (0 or 2). **(a)**  $\hat{\gamma}_{BN}$ ; **(b)**  $\hat{\gamma}_{BU}$ ; **(c)**  $\hat{\gamma}_{PF}$ ; **(d)**  $\hat{\gamma}_F$

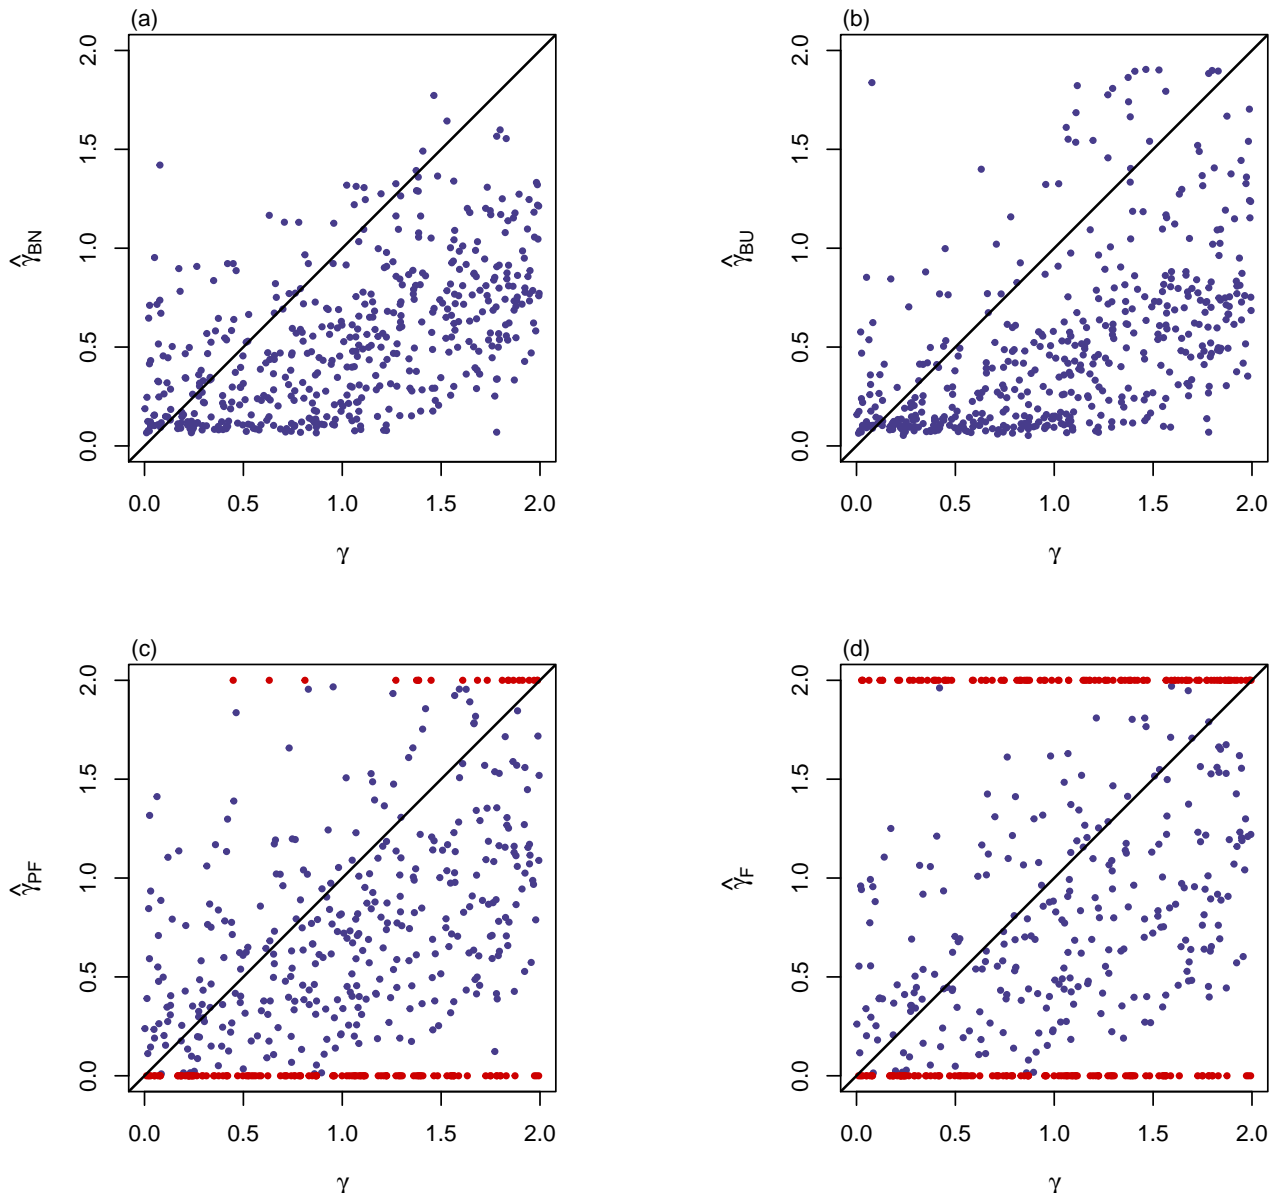

**Supplementary Figure S4** Scatter plots of point estimates of  $\gamma$  against true value of  $\gamma$  for qualitative trait with  $n = 500$ ,  $MAF = 0.1$  and  $\rho = -0.05$ . The red points represent the extreme values (0 or 2). (a)  $\hat{\gamma}_{BN}$ ; (b)  $\hat{\gamma}_{BU}$ ; (c)  $\hat{\gamma}_{PF}$ ; (d)  $\hat{\gamma}_F$

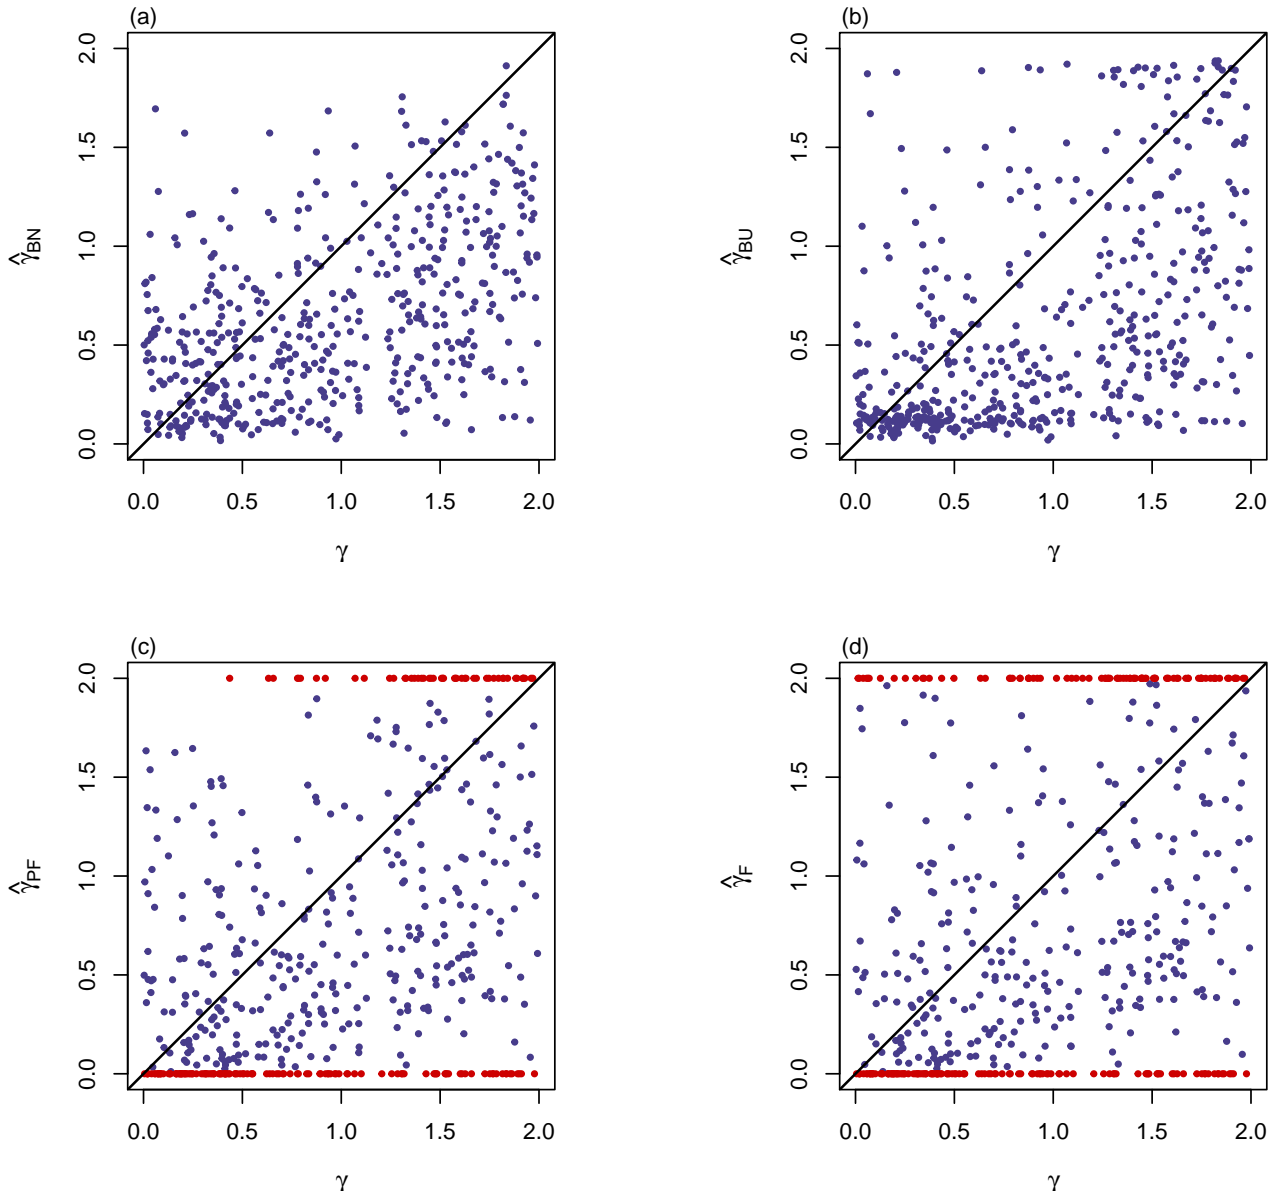

**Supplementary Figure S5** Scatter plots of point estimates of  $\gamma$  against true value of  $\gamma$  for qualitative trait with  $n = 500$ ,  $\text{MAF} = 0.1$  and  $\rho = 0.05$ . The red points represent the extreme values (0 or 2). **(a)**  $\hat{\gamma}_{BN}$ ; **(b)**  $\hat{\gamma}_{BU}$ ; **(c)**  $\hat{\gamma}_{PF}$ ; **(d)**  $\hat{\gamma}_F$

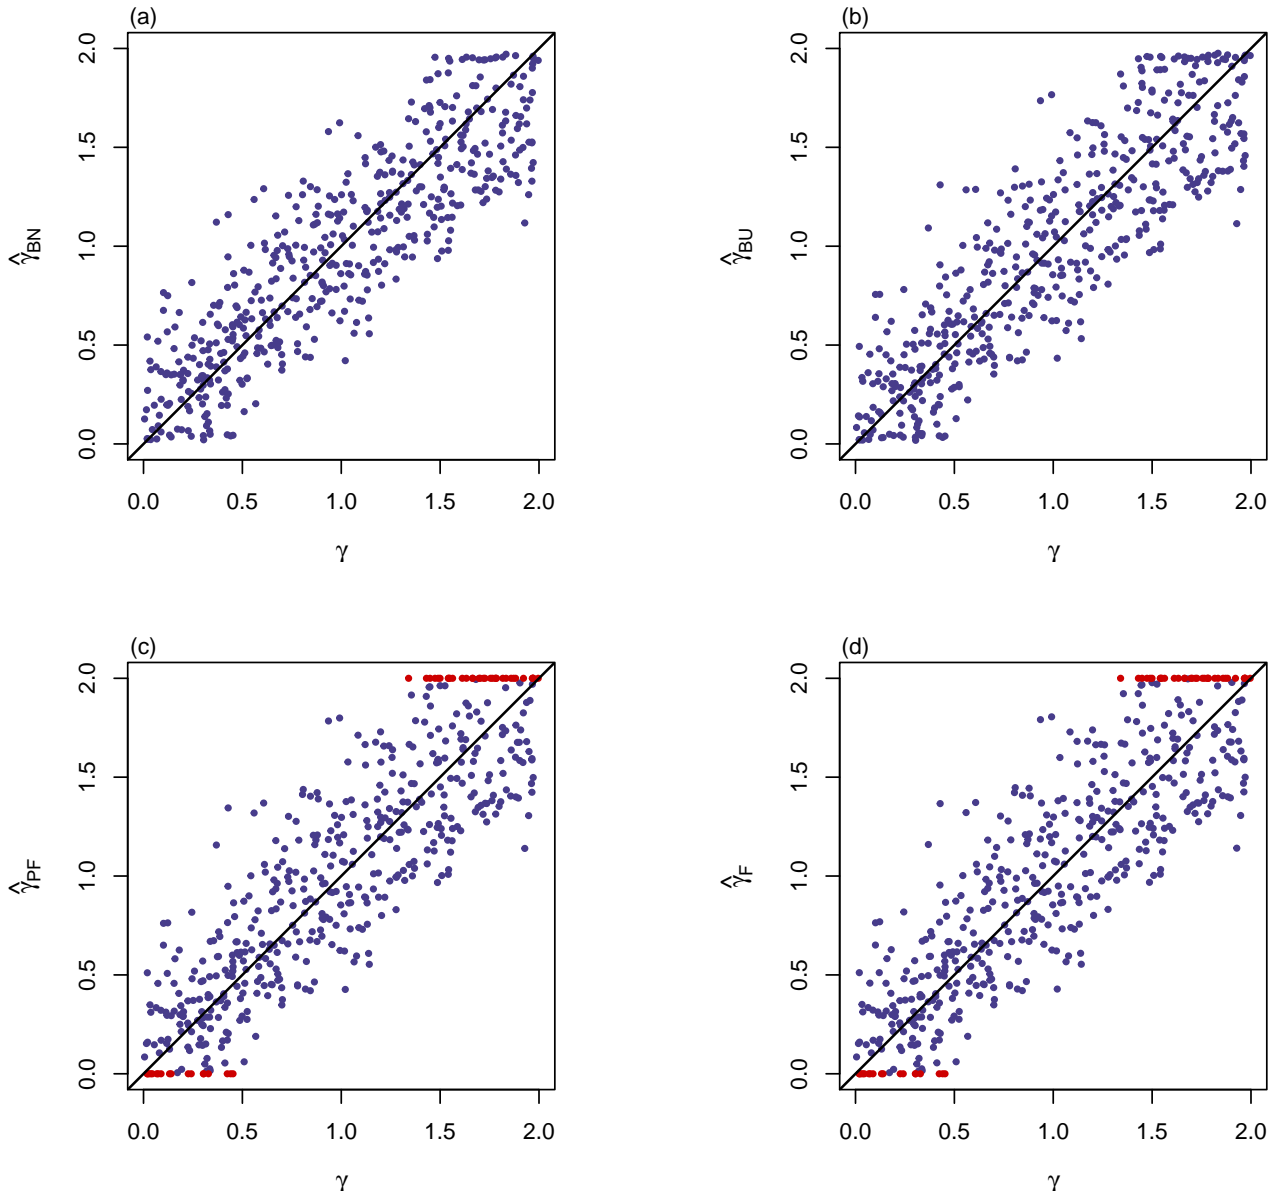

**Supplementary Figure S6** Scatter plots of point estimates of  $\gamma$  against true value of  $\gamma$  for qualitative trait with  $n = 2000$ ,  $MAF = 0.3$  and  $\rho = 0$ . The red points represent the extreme values (0 or 2). (a)  $\hat{\gamma}_{BN}$ ; (b)  $\hat{\gamma}_{BU}$ ; (c)  $\hat{\gamma}_{PF}$ ; (d)  $\hat{\gamma}_F$

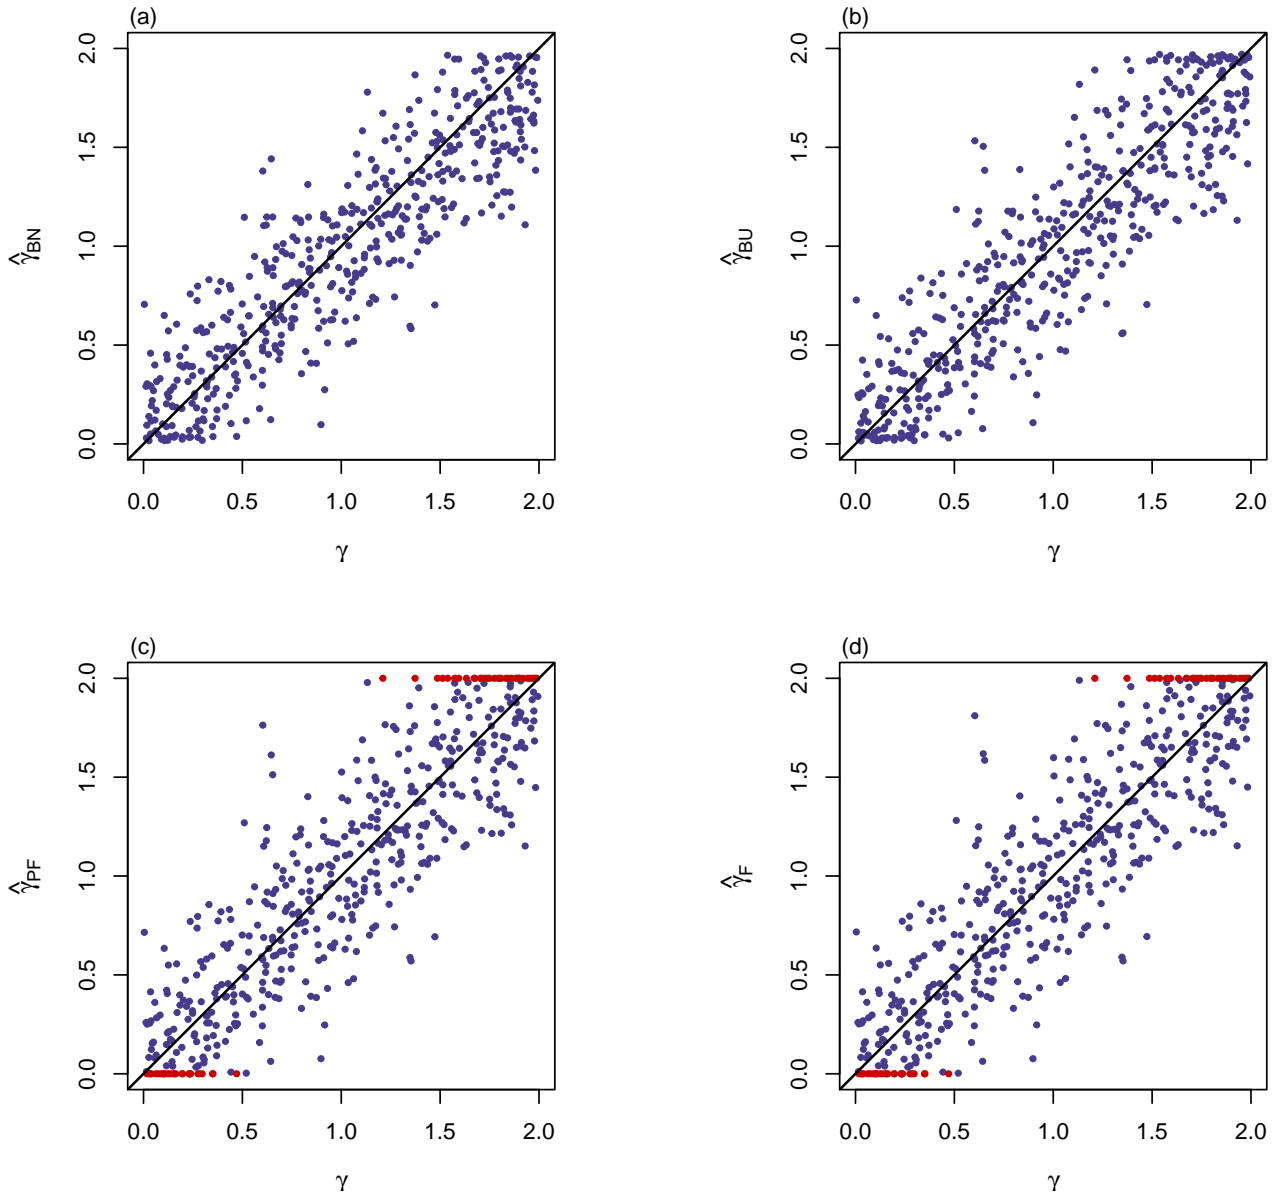

**Supplementary Figure S7** Scatter plots of point estimates of  $\gamma$  against true value of  $\gamma$  for qualitative trait with  $n = 2000$ ,  $\text{MAF} = 0.3$  and  $\rho = -0.05$ . The red points represent the extreme values (0 or 2). **(a)**  $\hat{\gamma}_{BN}$ ; **(b)**  $\hat{\gamma}_{BU}$ ; **(c)**  $\hat{\gamma}_{PF}$ ; **(d)**  $\hat{\gamma}_F$

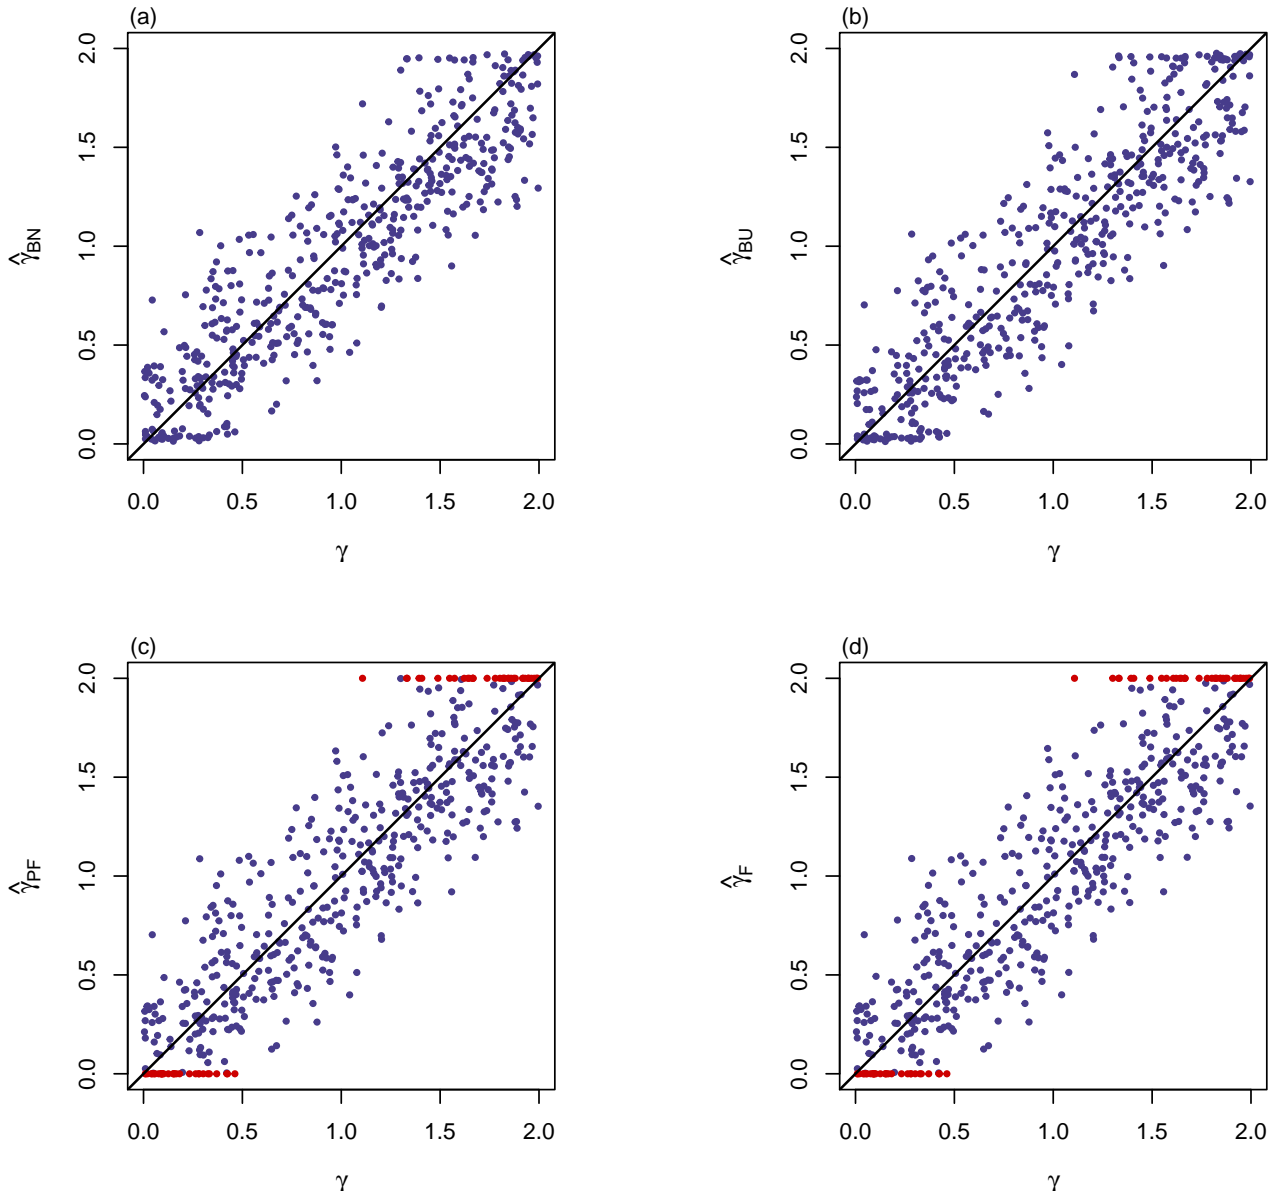

**Supplementary Figure S8** Scatter plots of point estimates of  $\gamma$  against true value of  $\gamma$  for qualitative trait with  $n = 2000$ ,  $MAF = 0.3$  and  $\rho = 0.05$ . The red points represent the extreme values (0 or 2). (a)  $\hat{\gamma}_{BN}$ ; (b)  $\hat{\gamma}_{BU}$ ; (c)  $\hat{\gamma}_{PF}$ ; (d)  $\hat{\gamma}_F$



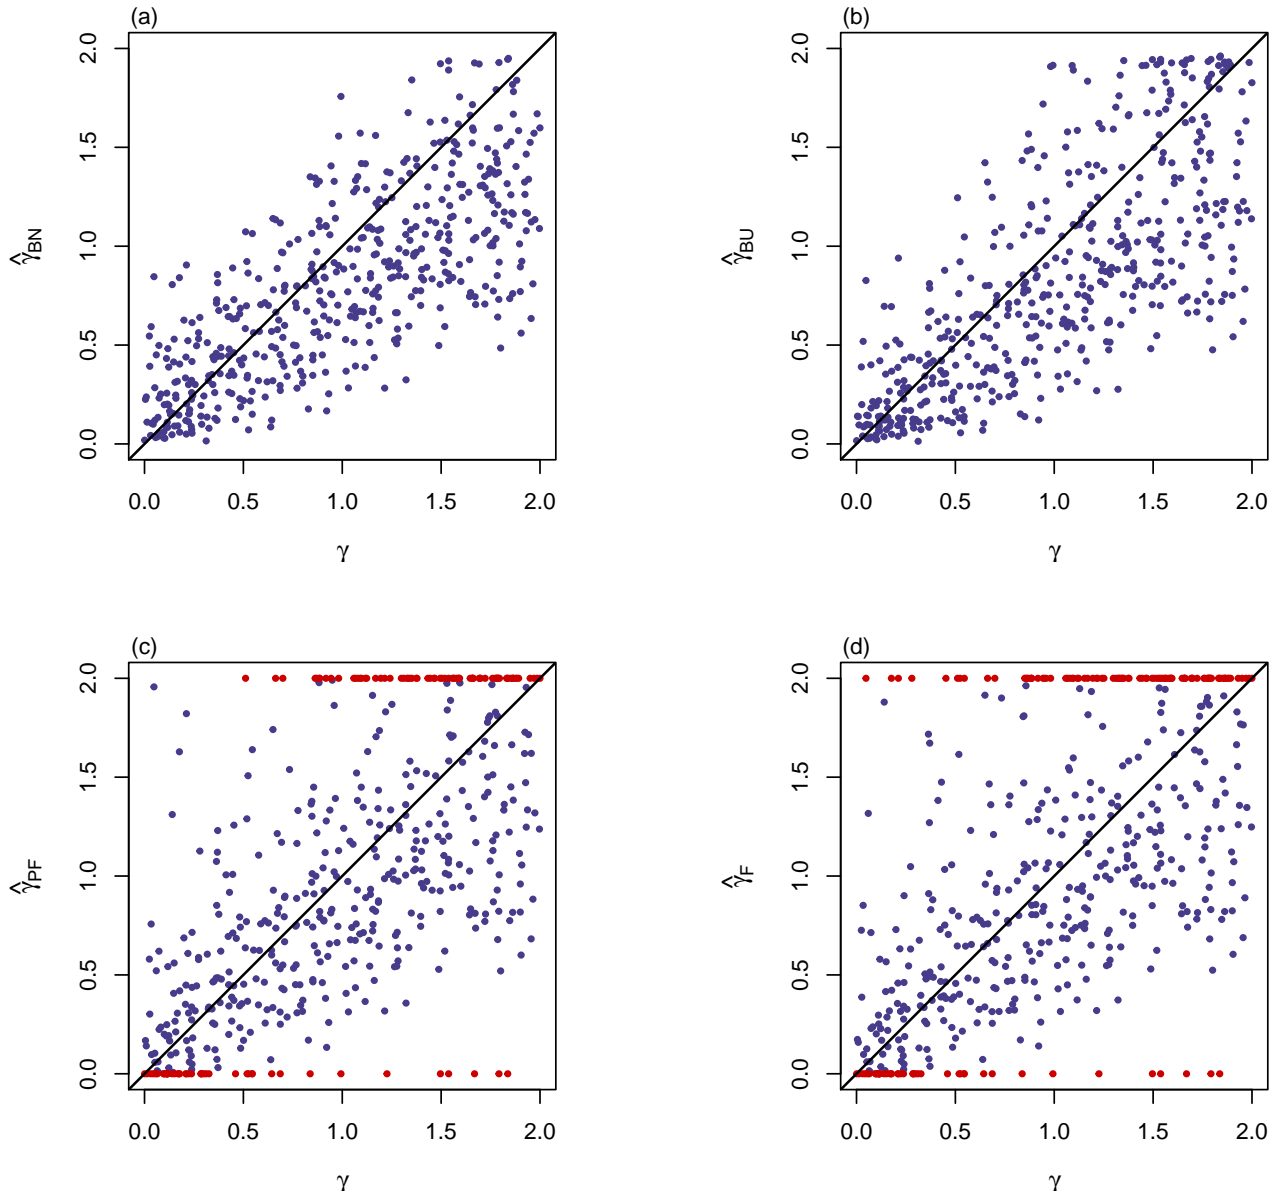

**Supplementary Figure S9** Scatter plots of point estimates of  $\gamma$  against true value of  $\gamma$  for qualitative trait with  $n = 2000$ ,  $MAF = 0.1$  and  $\rho = 0$ . The red points represent the extreme values (0 or 2). (a)  $\hat{\gamma}_{BN}$ ; (b)  $\hat{\gamma}_{BU}$ ; (c)  $\hat{\gamma}_{PF}$ ; (d)  $\hat{\gamma}_F$

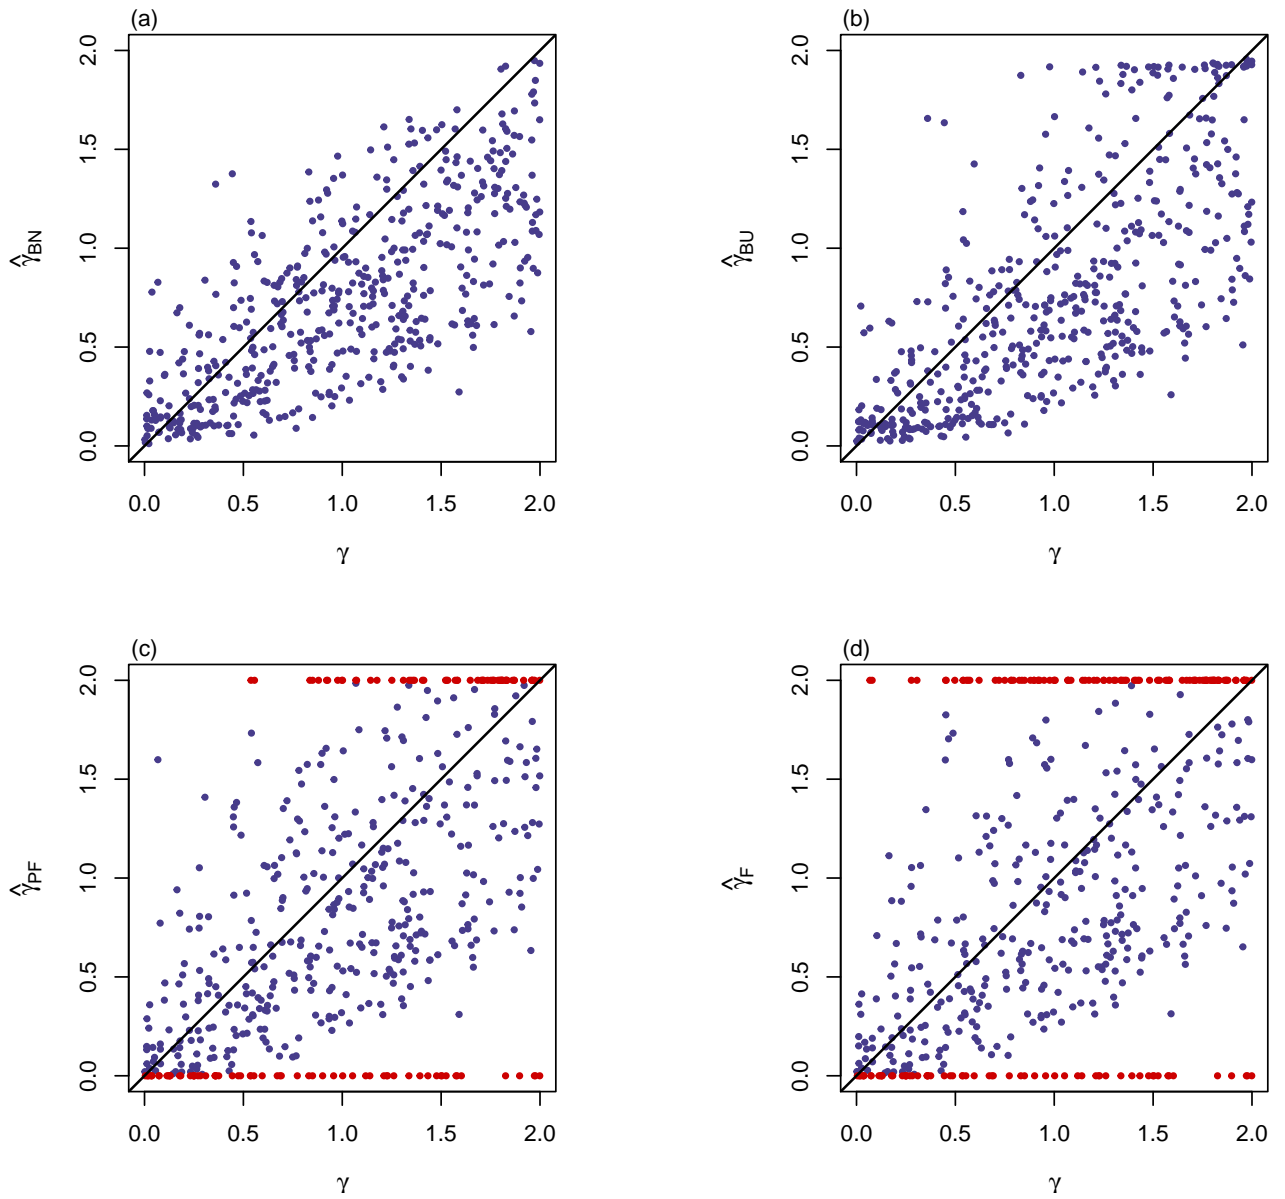

**Supplementary Figure S10** Scatter plots of point estimates of  $\gamma$  against true value of  $\gamma$  for qualitative trait with  $n = 2000$ ,  $MAF = 0.1$  and  $\rho = -0.05$ . The red points represent the extreme values (0 or 2). **(a)**  $\hat{\gamma}_{BN}$ ; **(b)**  $\hat{\gamma}_{BU}$ ; **(c)**  $\hat{\gamma}_{PF}$ ; **(d)**  $\hat{\gamma}_F$

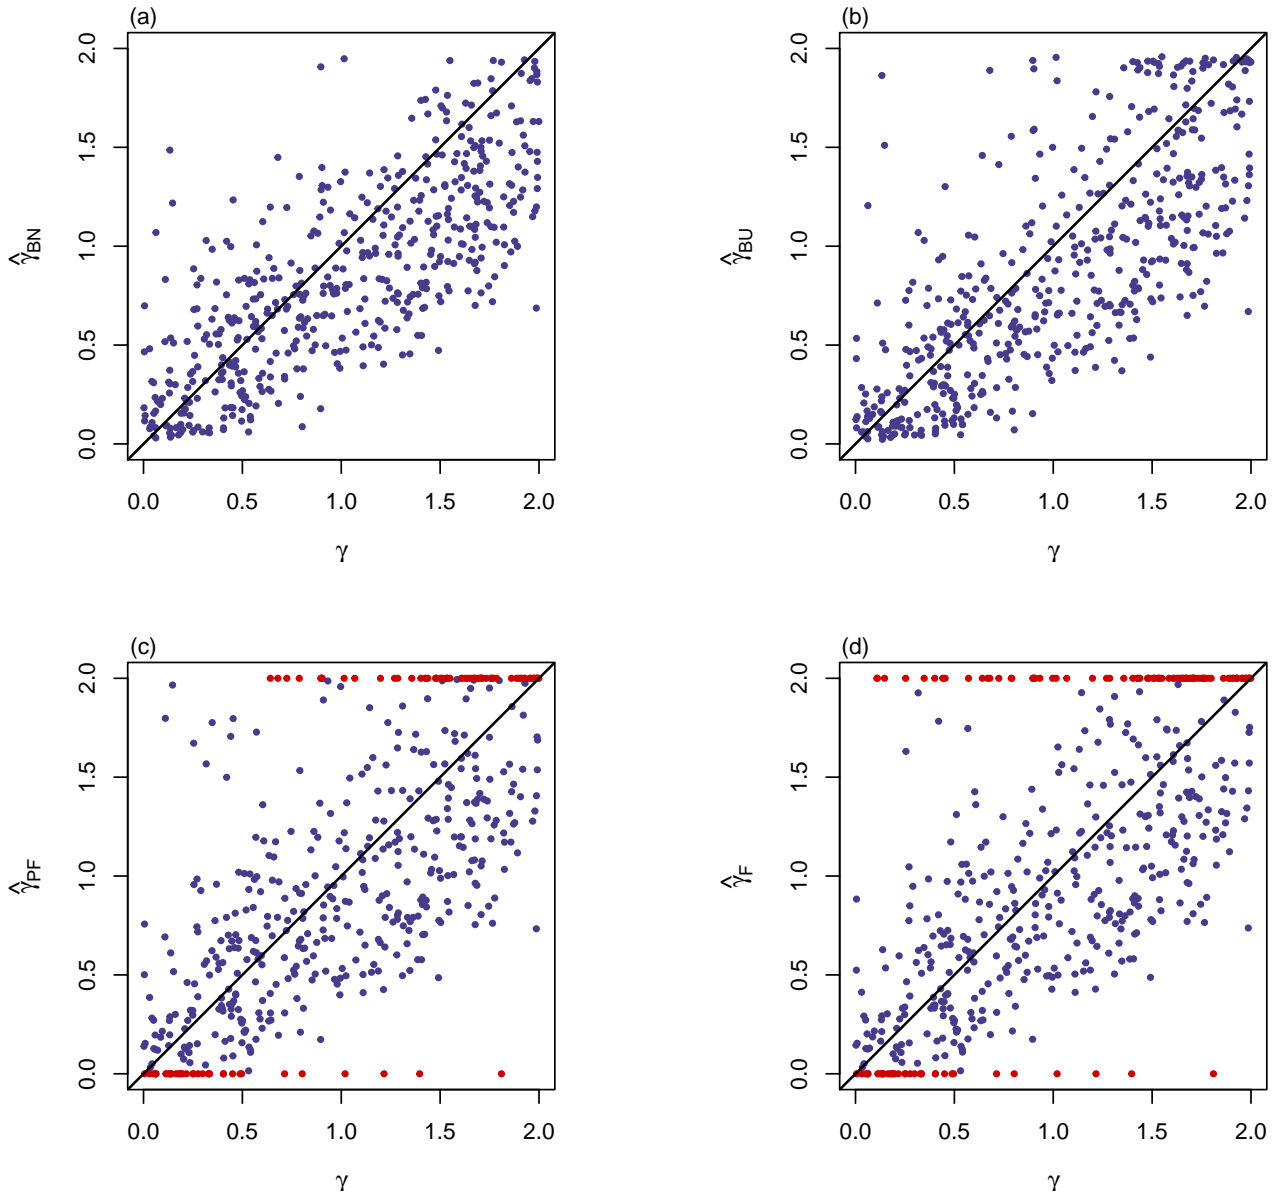

**Supplementary Figure S11** Scatter plots of point estimates of  $\gamma$  against true value of  $\gamma$  for qualitative trait with  $n = 2000$ ,  $MAF = 0.1$  and  $\rho = 0.05$ . The red points represent the extreme values (0 or 2). (a)  $\hat{\gamma}_{BN}$ ; (b)  $\hat{\gamma}_{BU}$ ; (c)  $\hat{\gamma}_{PF}$ ; (d)  $\hat{\gamma}_F$

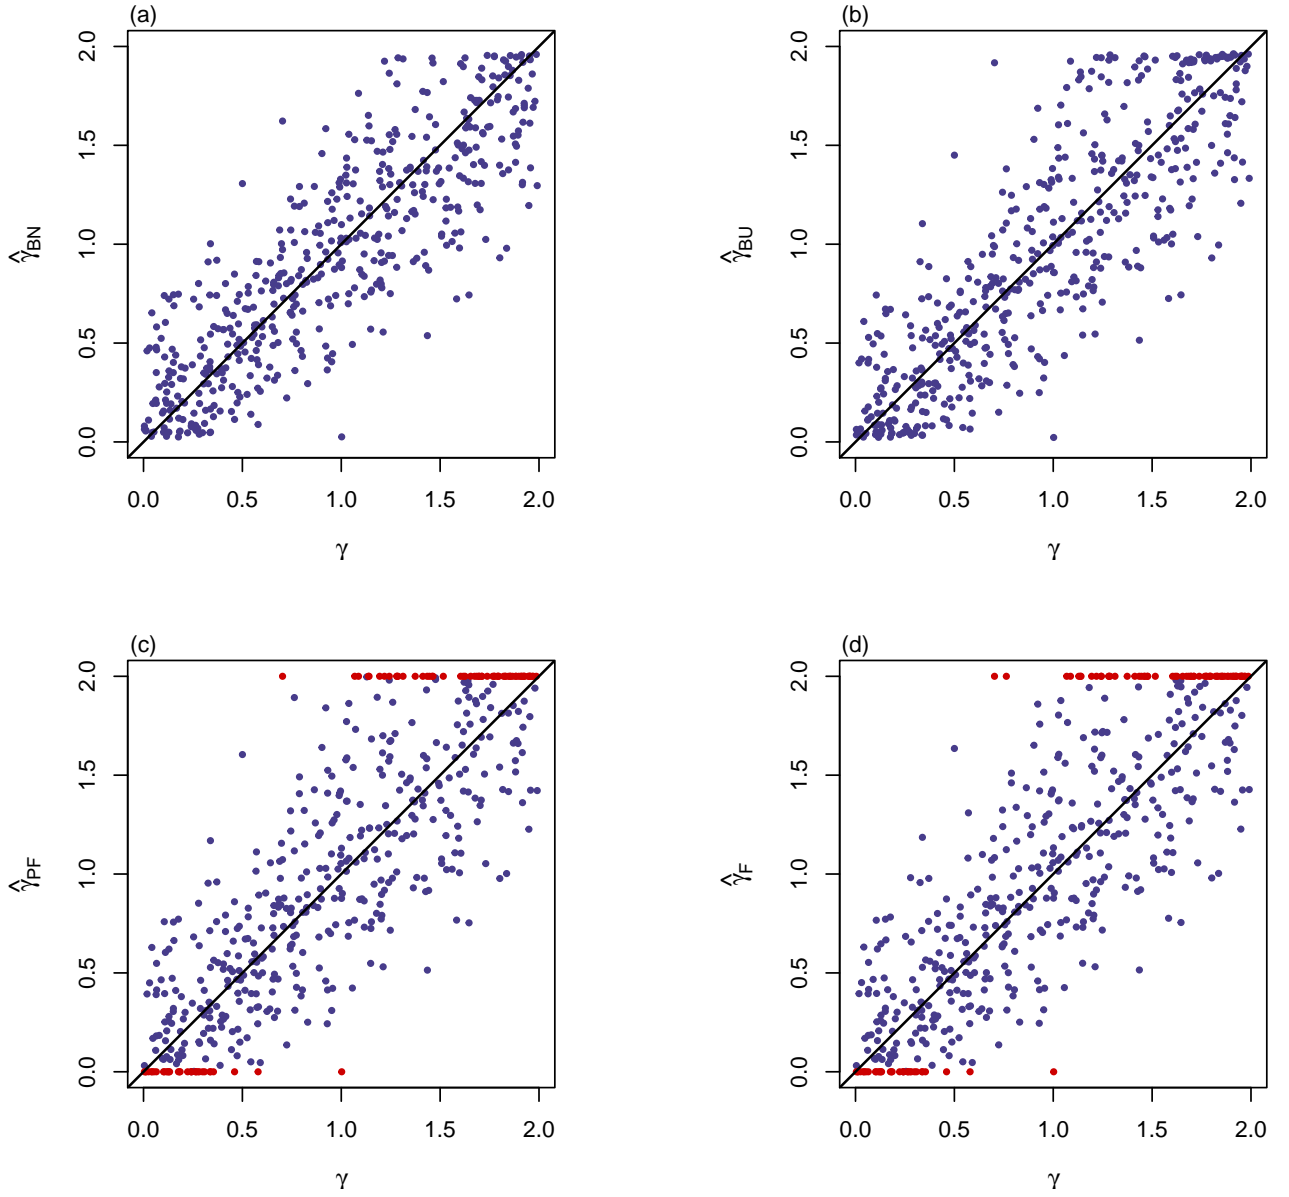

**Supplementary Figure S12** Scatter plots of point estimates of  $\gamma$  against true value of  $\gamma$  for quantitative trait when  $(\sigma_0^2, \sigma_1^2, \sigma_2^2) = (1, 1.2, 1)$  with  $n = 500$ ,  $\text{MAF} = 0.3$  and  $\rho = -0.05$ . The red points represent the extreme values (0 or 2). (a)  $\hat{\gamma}_{BN}$ ; (b)  $\hat{\gamma}_{BU}$ ; (c)  $\hat{\gamma}_{PF}$ ; (d)  $\hat{\gamma}_F$

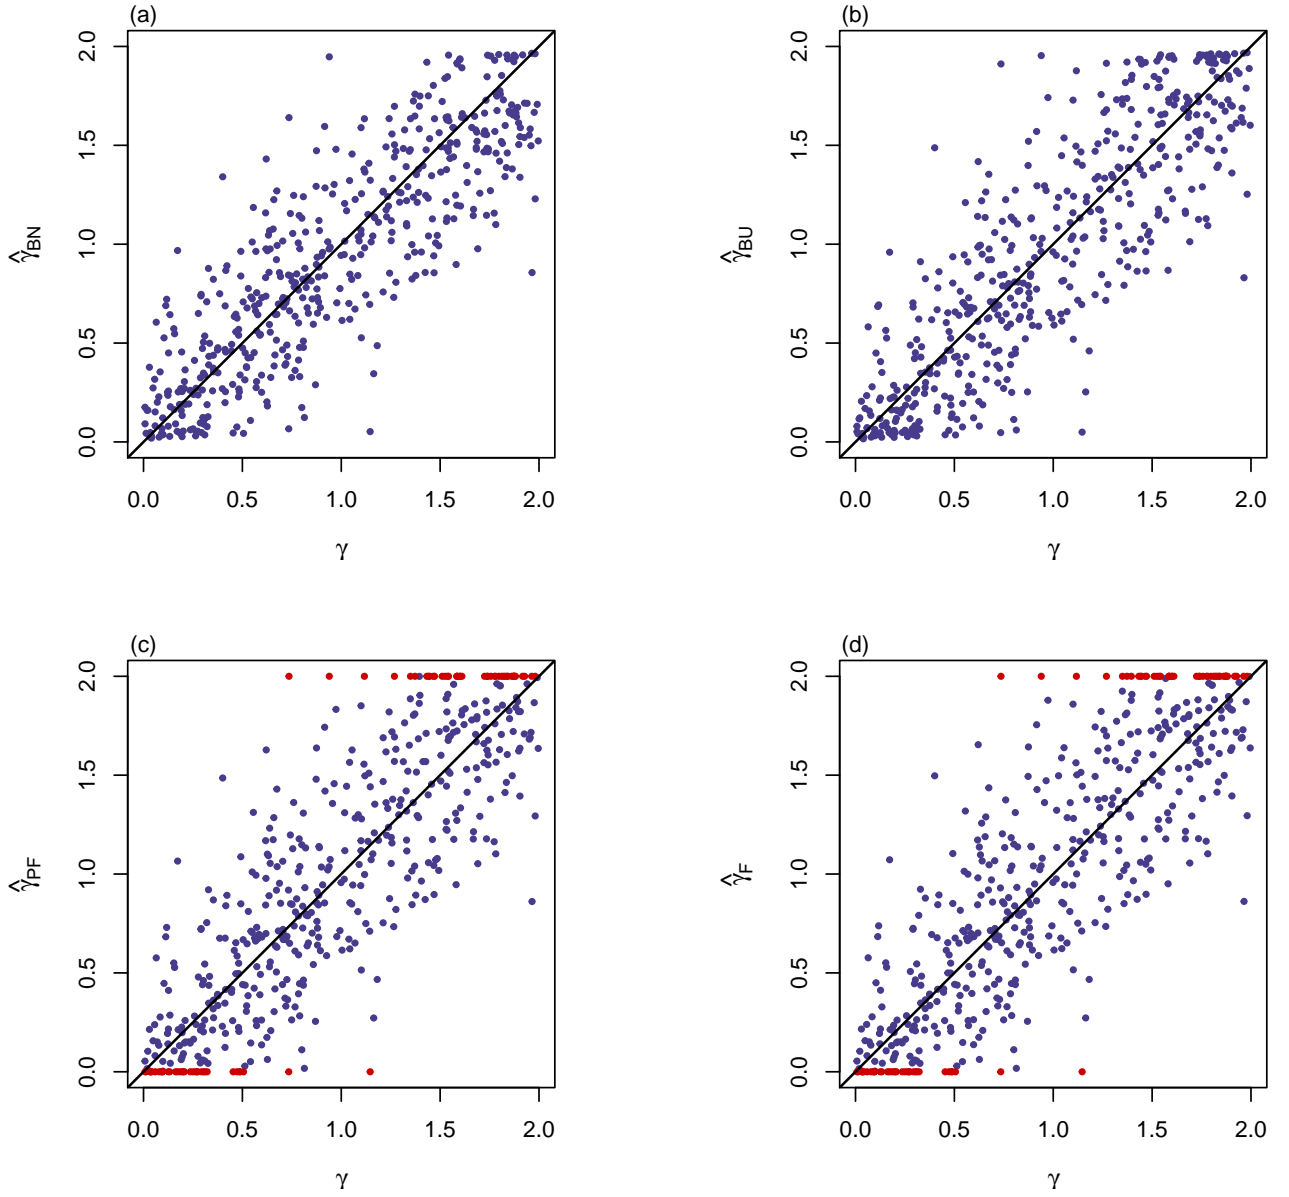

**Supplementary Figure S13** Scatter plots of point estimates of  $\gamma$  against true value of  $\gamma$  for quantitative trait when  $(\sigma_0^2, \sigma_1^2, \sigma_2^2) = (1, 1.2, 1)$  with  $n = 500$ ,  $\text{MAF} = 0.3$  and  $\rho = 0.05$ . The red points represent the extreme values (0 or 2). **(a)**  $\hat{\gamma}_{BN}$ ; **(b)**  $\hat{\gamma}_{BU}$ ; **(c)**  $\hat{\gamma}_{PF}$ ; **(d)**  $\hat{\gamma}_F$

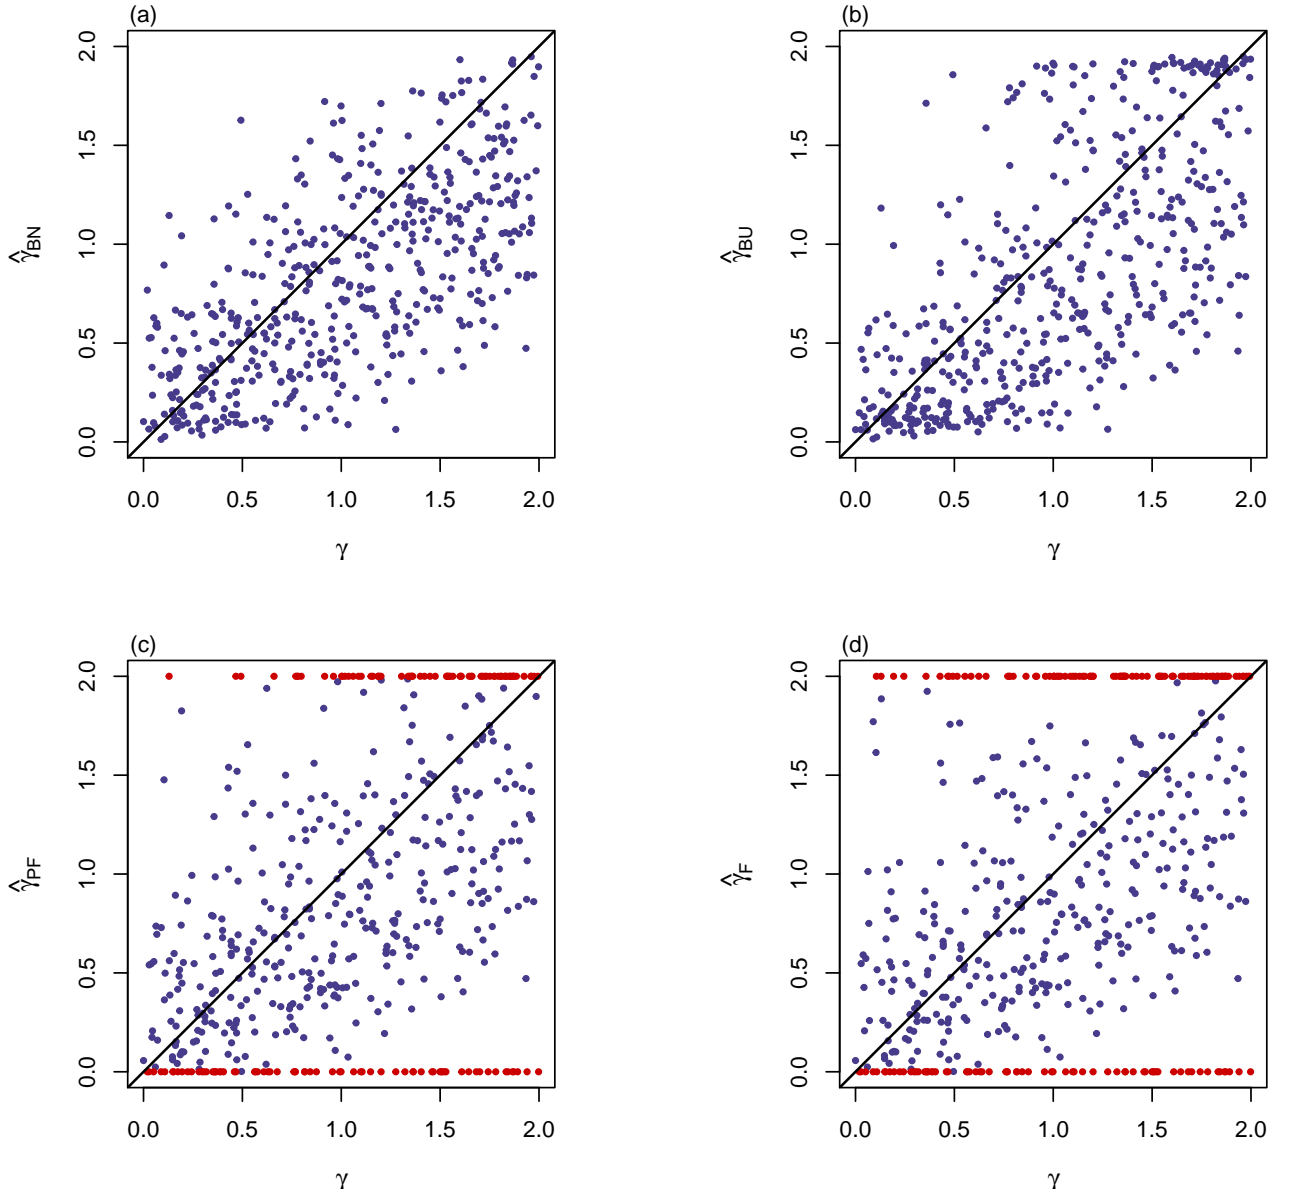

**Supplementary Figure S14** Scatter plots of point estimates of  $\gamma$  against true value of  $\gamma$  for quantitative trait when  $(\sigma_0^2, \sigma_1^2, \sigma_2^2) = (1, 1.2, 1)$  with  $n = 500$ ,  $\text{MAF} = 0.1$  and  $\rho = 0$ . The red points represent the extreme values (0 or 2). (a)  $\hat{\gamma}_{BN}$ ; (b)  $\hat{\gamma}_{BU}$ ; (c)  $\hat{\gamma}_{PF}$ ; (d)  $\hat{\gamma}_F$

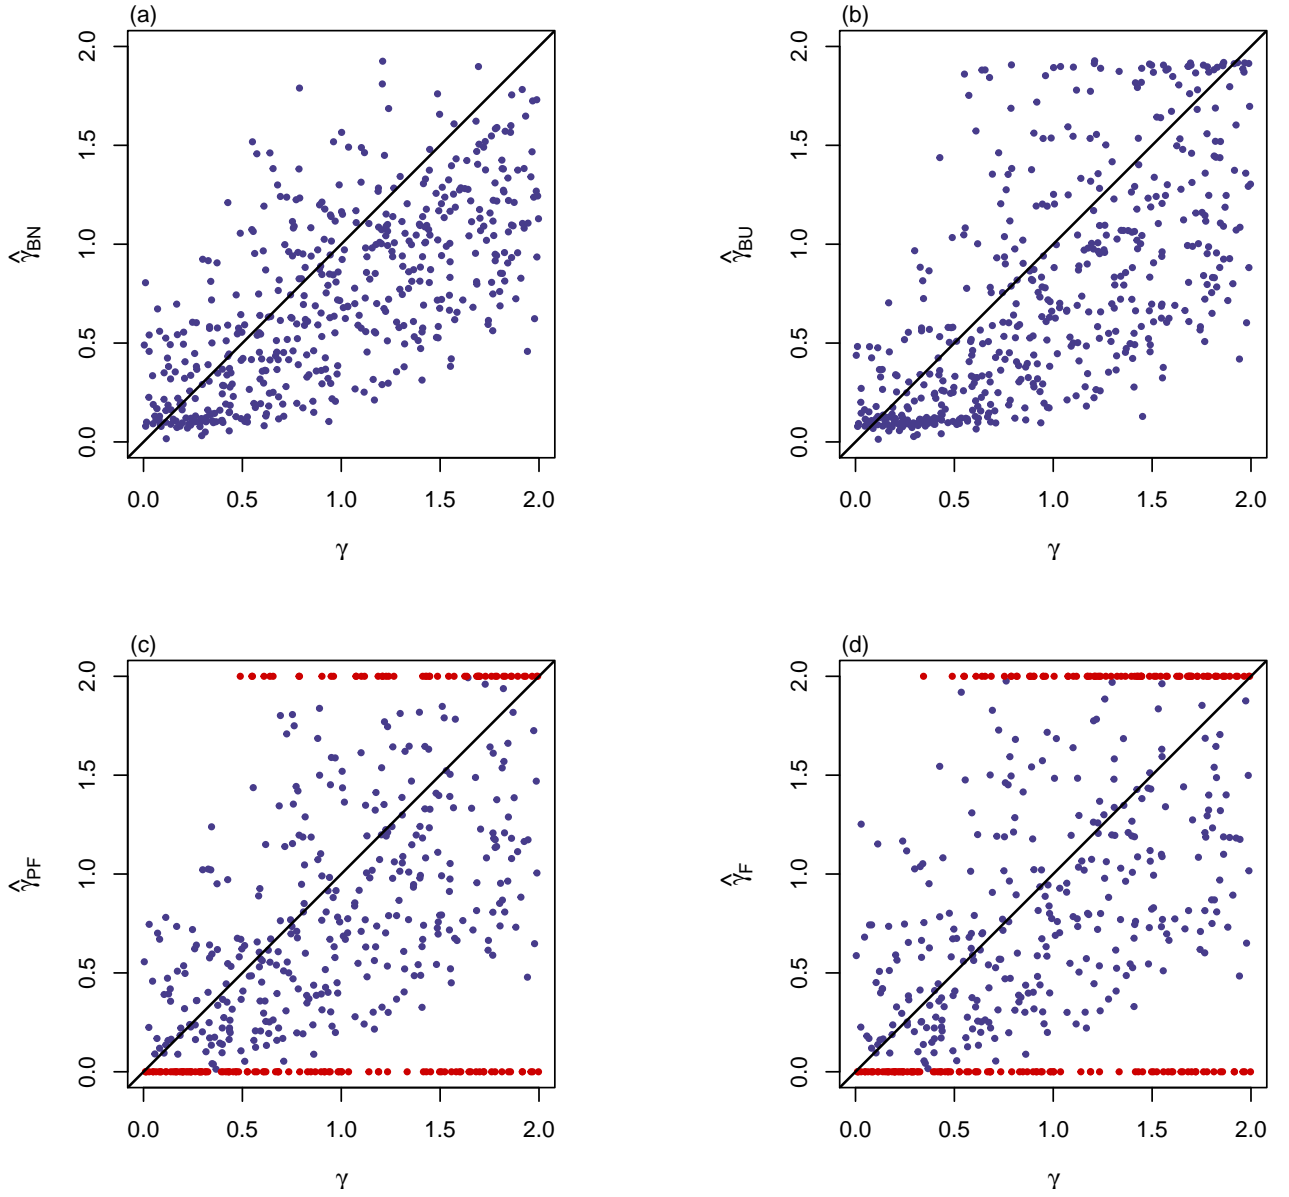

**Supplementary Figure S15** Scatter plots of point estimates of  $\gamma$  against true value of  $\gamma$  for quantitative trait when  $(\sigma_0^2, \sigma_1^2, \sigma_2^2) = (1, 1.2, 1)$  with  $n = 500$ ,  $\text{MAF} = 0.1$  and  $\rho = -0.05$ . The red points represent the extreme values (0 or 2). **(a)**  $\hat{\gamma}_{BN}$ ; **(b)**  $\hat{\gamma}_{BU}$ ; **(c)**  $\hat{\gamma}_{PF}$ ; **(d)**  $\hat{\gamma}_F$

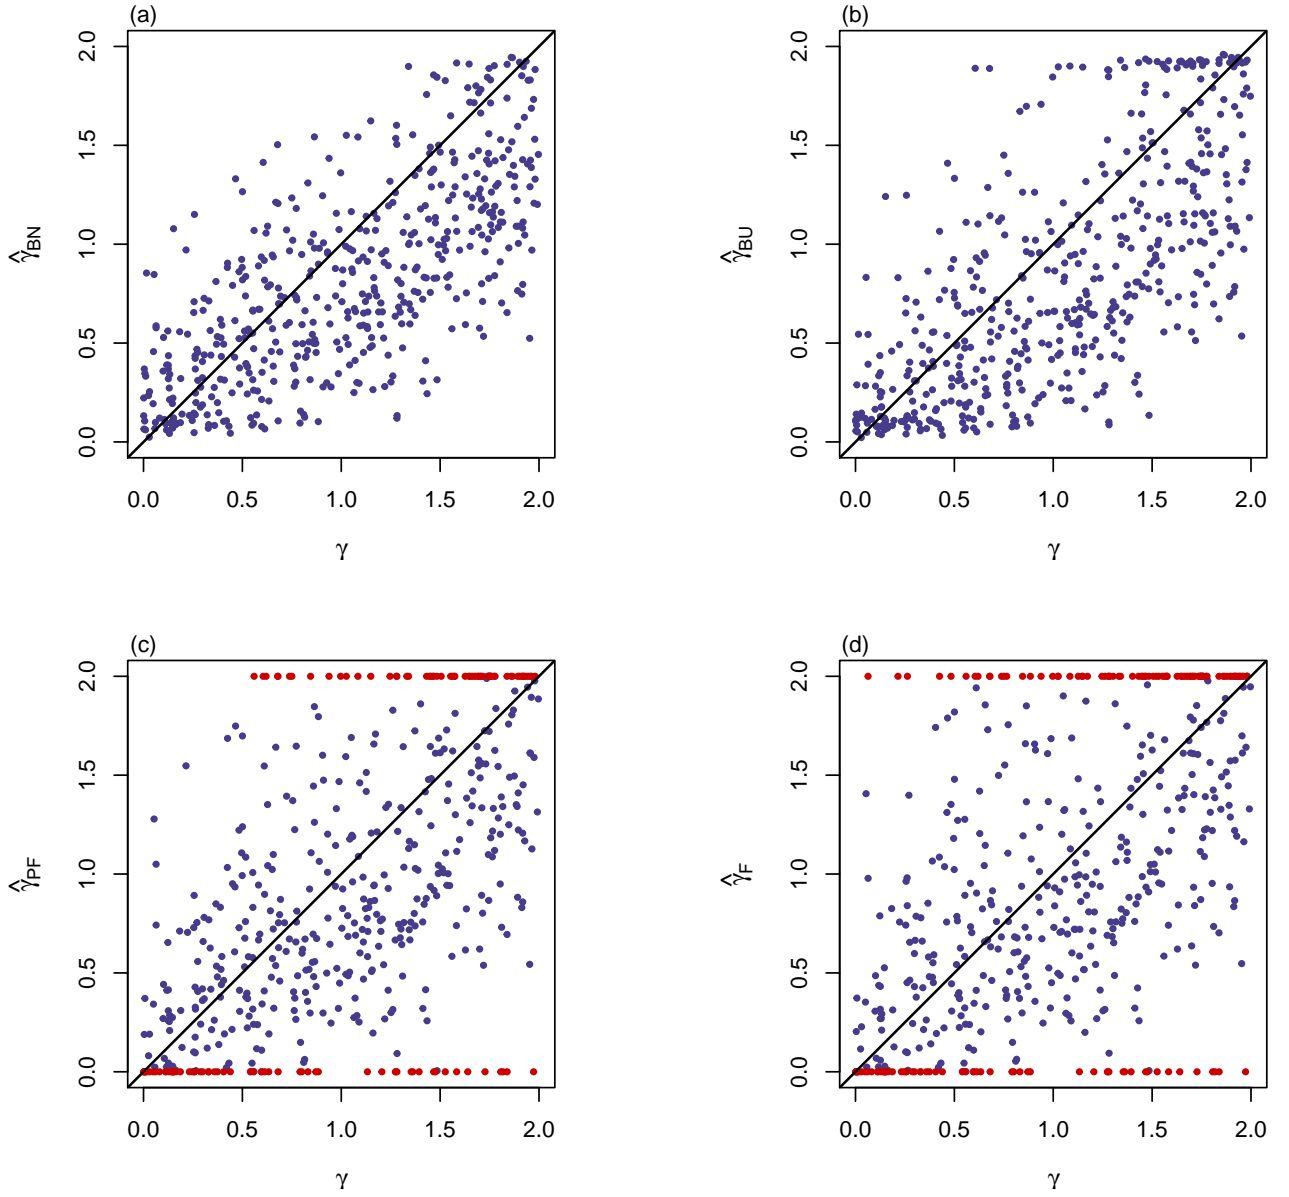

**Supplementary Figure S16** Scatter plots of point estimates of  $\gamma$  against true value of  $\gamma$  for quantitative trait when  $(\sigma_0^2, \sigma_1^2, \sigma_2^2) = (1, 1.2, 1)$  with  $n = 500$ ,  $\text{MAF} = 0.1$  and  $\rho = 0.05$ . The red points represent the extreme values (0 or 2). **(a)**  $\hat{\gamma}_{BN}$ ; **(b)**  $\hat{\gamma}_{BU}$ ; **(c)**  $\hat{\gamma}_{PF}$ ; **(d)**  $\hat{\gamma}_F$



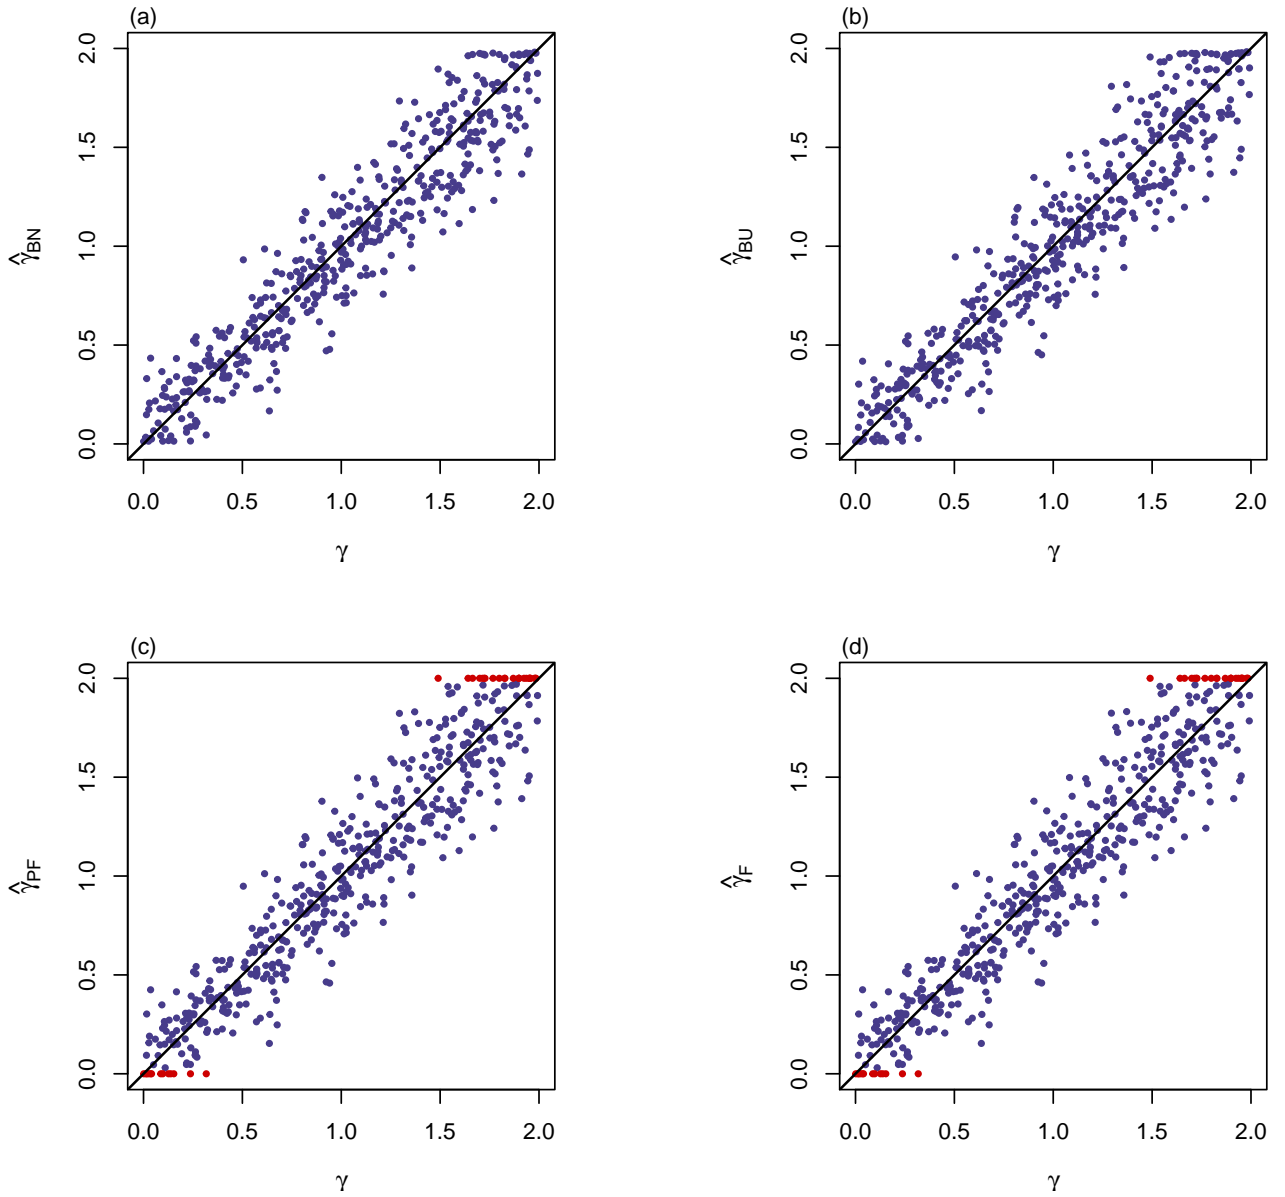

**Supplementary Figure S17** Scatter plots of point estimates of  $\gamma$  against true value of  $\gamma$  for quantitative trait when  $(\sigma_0^2, \sigma_1^2, \sigma_2^2) = (1, 1.2, 1)$  with  $n = 2000$ ,  $MAF = 0.3$  and  $\rho = 0$ . The red points represent the extreme values (0 or 2). (a)  $\hat{\gamma}_{BN}$ ; (b)  $\hat{\gamma}_{BU}$ ; (c)  $\hat{\gamma}_{PF}$ ; (d)  $\hat{\gamma}_F$

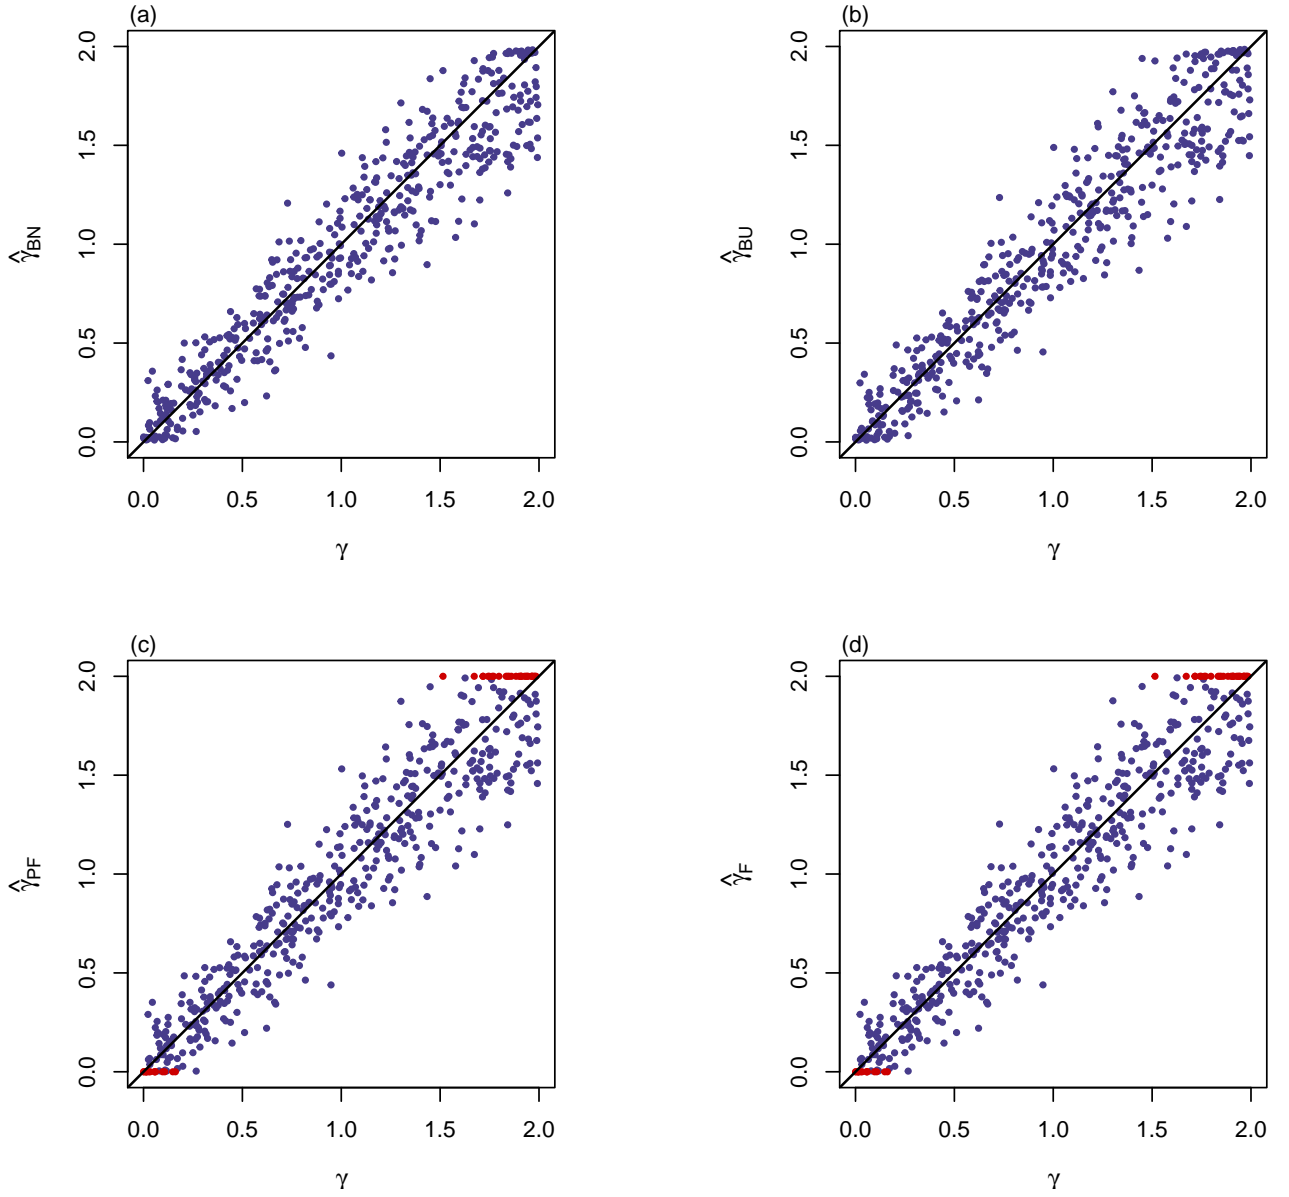

**Supplementary Figure S18** Scatter plots of point estimates of  $\gamma$  against true value of  $\gamma$  for quantitative trait when  $(\sigma_0^2, \sigma_1^2, \sigma_2^2) = (1, 1.2, 1)$  with  $n = 2000$ ,  $\text{MAF} = 0.3$  and  $\rho = -0.05$ . The red points represent the extreme values (0 or 2). (a)  $\hat{\gamma}_{BN}$ ; (b)  $\hat{\gamma}_{BU}$ ; (c)  $\hat{\gamma}_{PF}$ ; (d)  $\hat{\gamma}_F$

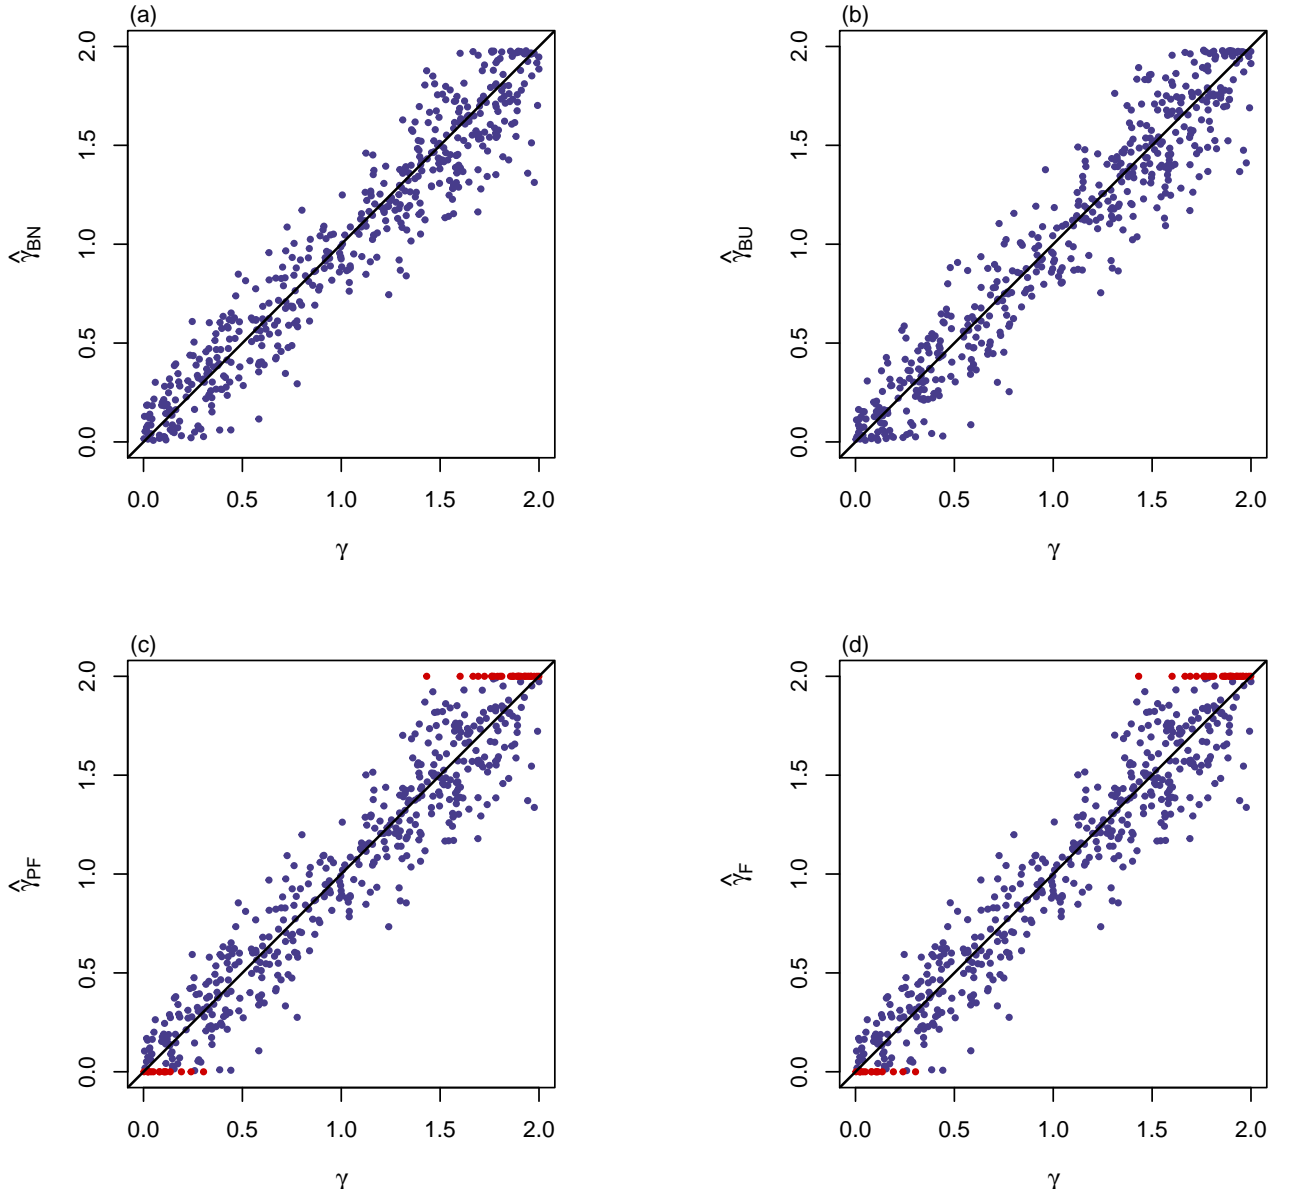

**Supplementary Figure S19** Scatter plots of point estimates of  $\gamma$  against true value of  $\gamma$  for quantitative trait when  $(\sigma_0^2, \sigma_1^2, \sigma_2^2) = (1, 1.2, 1)$  with  $n = 2000$ ,  $MAF = 0.3$  and  $\rho = 0.05$ . The red points represent the extreme values (0 or 2). **(a)**  $\hat{\gamma}_{BN}$ ; **(b)**  $\hat{\gamma}_{BU}$ ; **(c)**  $\hat{\gamma}_{PF}$ ; **(d)**  $\hat{\gamma}_F$

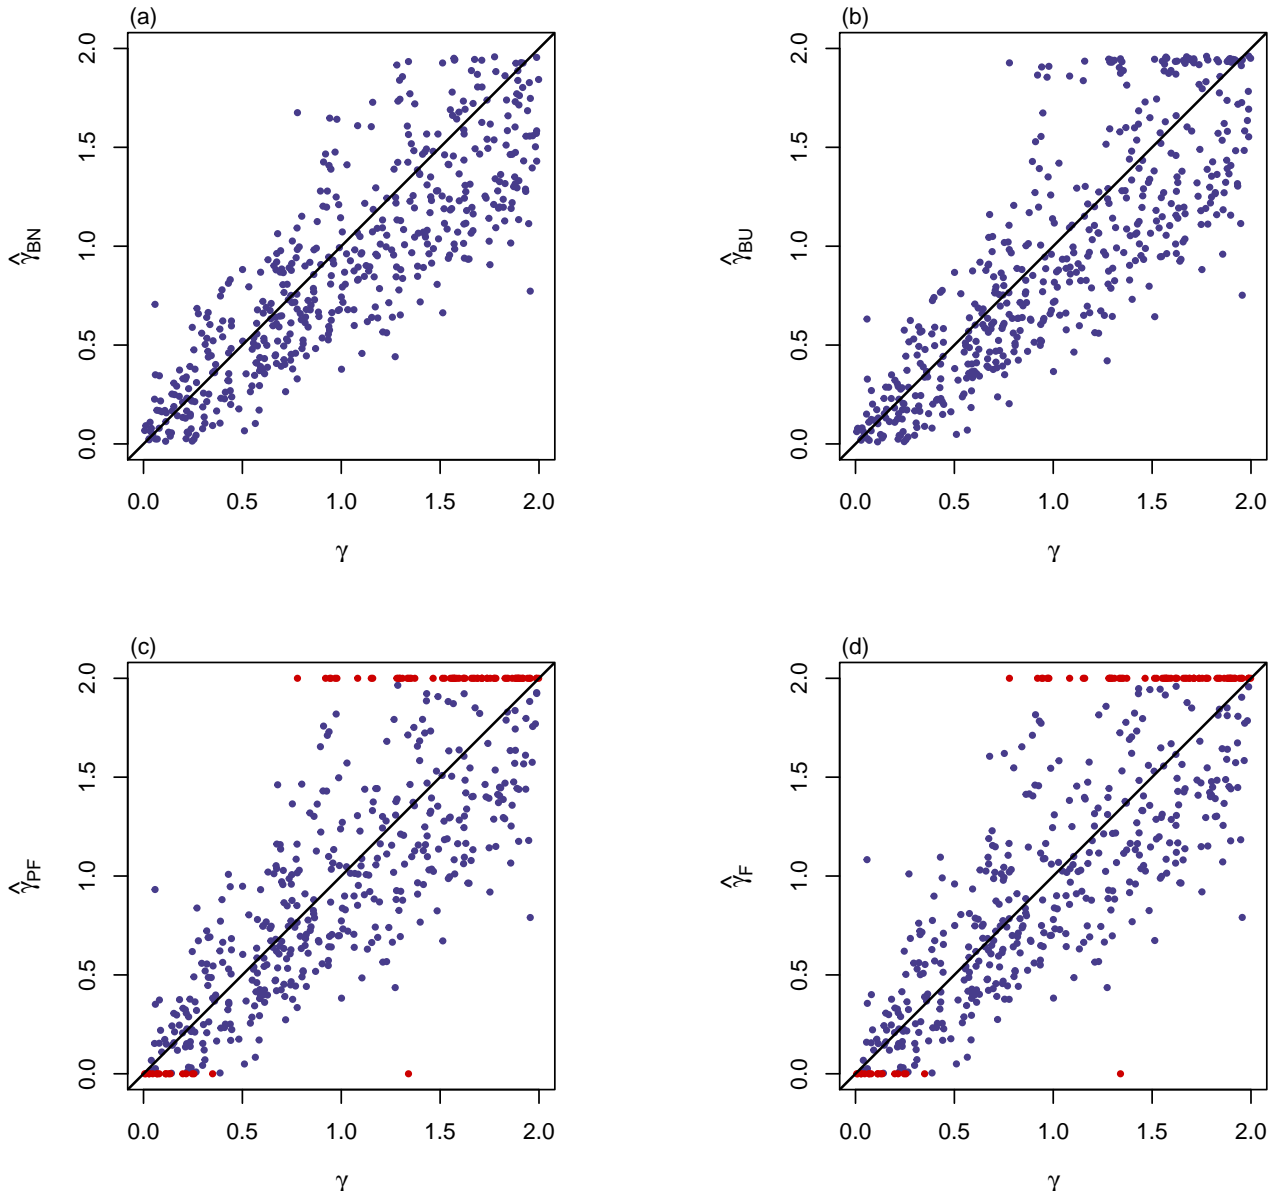

**Supplementary Figure S20** Scatter plots of point estimates of  $\gamma$  against true value of  $\gamma$  for quantitative trait when  $(\sigma_0^2, \sigma_1^2, \sigma_2^2) = (1, 1.2, 1)$  with  $n = 2000$ ,  $\text{MAF} = 0.1$  and  $\rho = 0$ . The red points represent the extreme values (0 or 2). (a)  $\hat{\gamma}_{BN}$ ; (b)  $\hat{\gamma}_{BU}$ ; (c)  $\hat{\gamma}_{PF}$ ; (d)  $\hat{\gamma}_F$

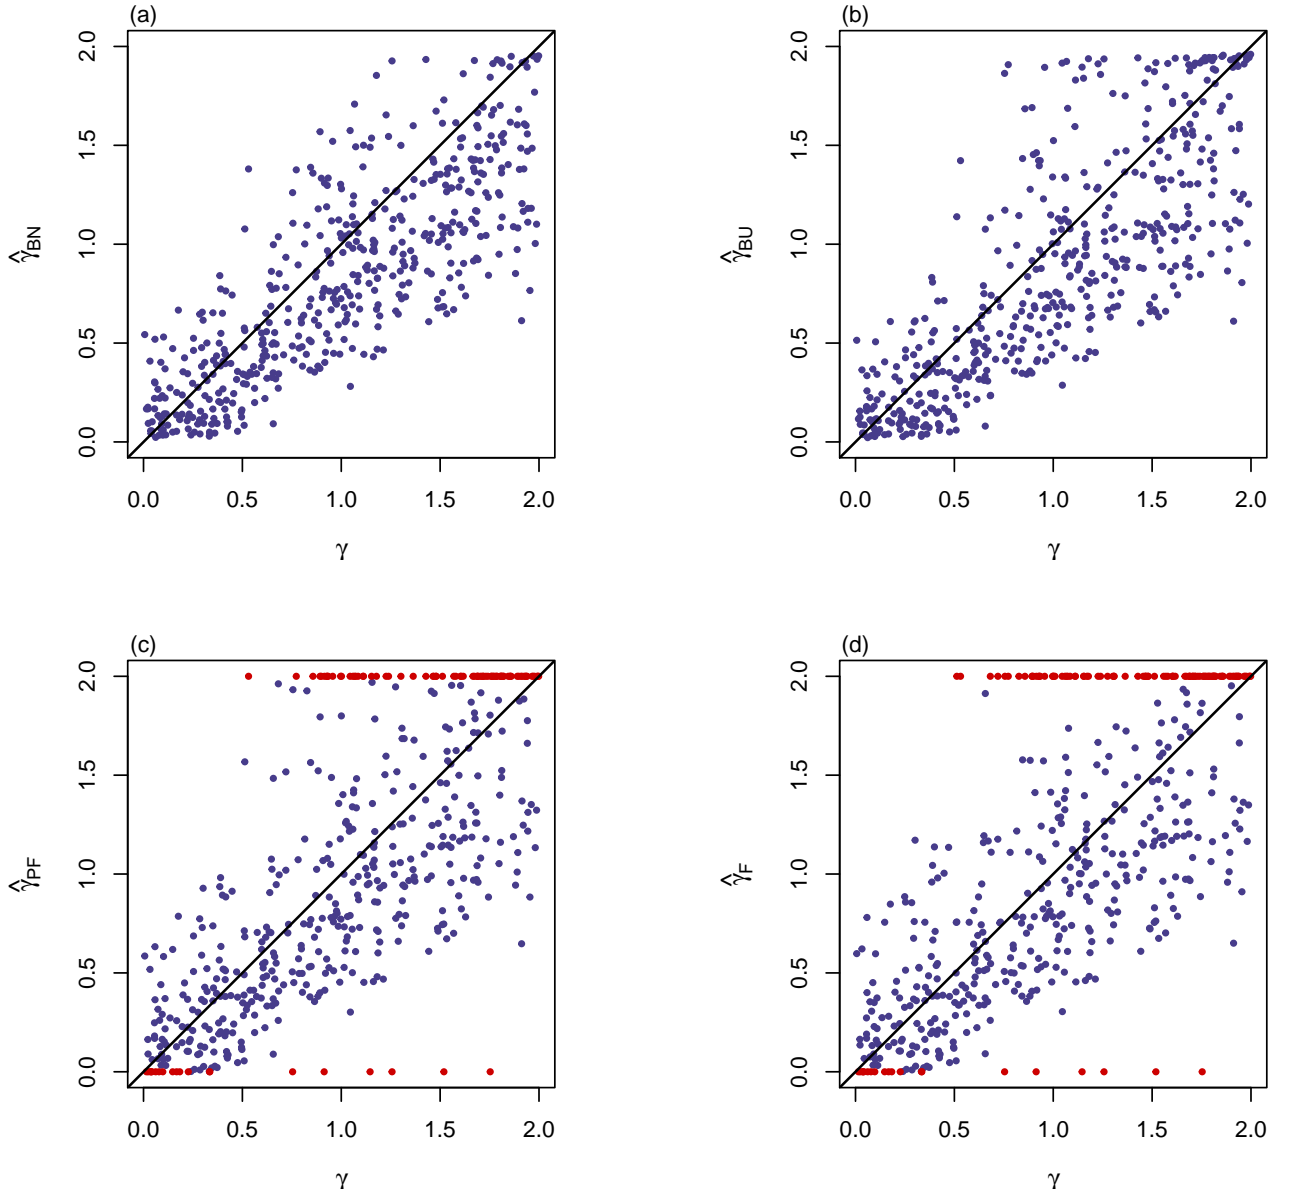

**Supplementary Figure S21** Scatter plots of point estimates of  $\gamma$  against true value of  $\gamma$  for quantitative trait when  $(\sigma_0^2, \sigma_1^2, \sigma_2^2) = (1, 1.2, 1)$  with  $n = 2000$ ,  $\text{MAF} = 0.1$  and  $\rho = -0.05$ . The red points represent the extreme values (0 or 2). **(a)**  $\hat{\gamma}_{BN}$ ; **(b)**  $\hat{\gamma}_{BU}$ ; **(c)**  $\hat{\gamma}_{PF}$ ; **(d)**  $\hat{\gamma}_F$

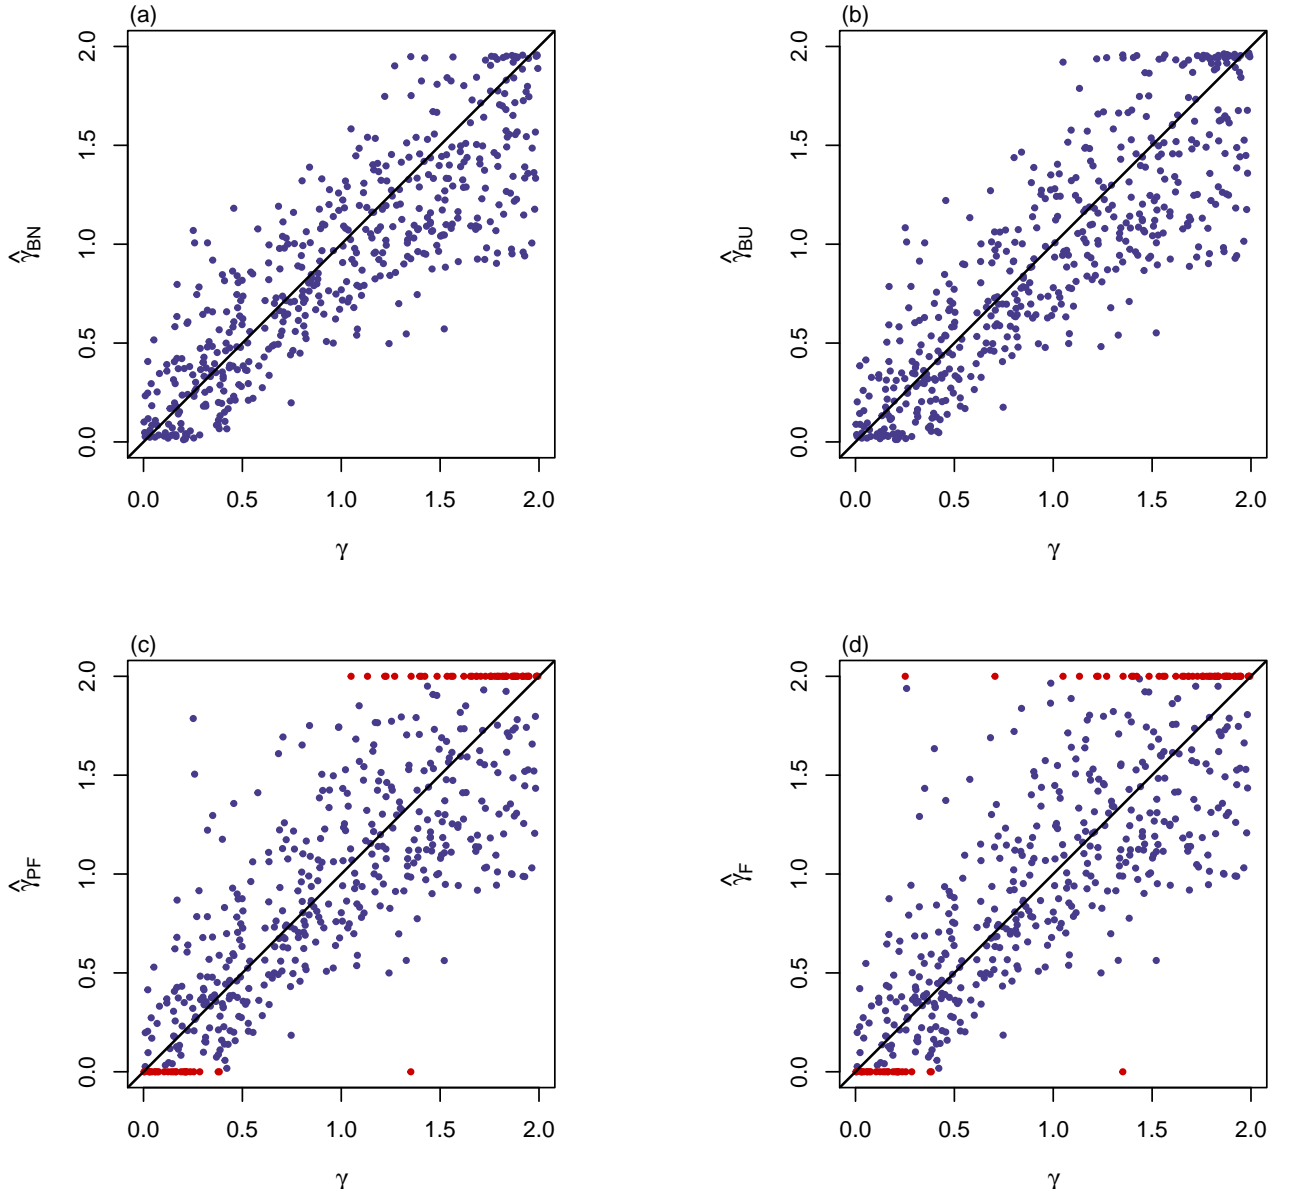

**Supplementary Figure S22** Scatter plots of point estimates of  $\gamma$  against true value of  $\gamma$  for quantitative trait when  $(\sigma_0^2, \sigma_1^2, \sigma_2^2) = (1, 1.2, 1)$  with  $n = 2000$ ,  $\text{MAF} = 0.1$  and  $\rho = 0.05$ . The red points represent the extreme values (0 or 2). **(a)**  $\hat{\gamma}_{BN}$ ; **(b)**  $\hat{\gamma}_{BU}$ ; **(c)**  $\hat{\gamma}_{PF}$ ; **(d)**  $\hat{\gamma}_F$
