# Supplementary material for: BEXCIS: Bayesian methods for estimating the degree of the skewness of X chromosome inactivation
Source: Springer Nature journal article supplement (doi:10.1186/s12859-022-04721-y), 2022-05-24
Supplement: 12859_2022_4721_MOESM3_ESM.pdf [file 12859_2022_4721_MOESM3_ESM.pdf]

## Additional file 3: Supplementary Tables

**Table S1.** Standard deviation and interquartile range of the widths of the highest posterior density intervals or confidence intervals (respectively denoted as  $W_{SD}$  and  $W_{IQR}$ ) of Bayesian method with normal prior (BN), Bayesian method with uniform prior (BU), penalized Fieller's (PF) and Fieller's methods among 500 replicates for qualitative trait and quantitative trait with  $(\sigma_0^2, \sigma_1^2, \sigma_2^2) = (1, 1.2, 1)$

| Trait        | $n$  | MAF | $\rho$ | $W_{SD}$ |        |        |         | $W_{IQR}$ |        |        |         |
|--------------|------|-----|--------|----------|--------|--------|---------|-----------|--------|--------|---------|
|              |      |     |        | BN       | BU     | PF     | Fieller | BN        | BU     | PF     | Fieller |
| Qualitative  | 500  | 0.3 | 0      | 0.2881   | 0.3194 | 0.4391 | 0.4773  | 0.4301    | 0.4732 | 0.7140 | 0.7595  |
|              |      |     | -0.05  | 0.3022   | 0.3345 | 0.4577 | 0.5183  | 0.4575    | 0.5139 | 0.7543 | 0.8160  |
|              |      |     | 0.05   | 0.2972   | 0.3303 | 0.4461 | 0.4907  | 0.4628    | 0.5221 | 0.7723 | 0.8743  |
|              |      | 0.1 | 0      | 0.1642   | 0.1836 | 0.6031 | 0.2981  | 0.2004    | 0.2083 | 0.7195 | 0.2372  |
|              |      |     | -0.05  | 0.1113   | 0.1204 | 0.7025 | 0.2680  | 0.1363    | 0.1387 | 0.6949 | 0.2719  |
|              |      |     | 0.05   | 0.2062   | 0.2296 | 0.5921 | 0.4096  | 0.2753    | 0.2945 | 0.7329 | 0.3140  |
|              | 2000 | 0.3 | 0      | 0.2447   | 0.2703 | 0.3056 | 0.3187  | 0.3192    | 0.3651 | 0.3826 | 0.3980  |
|              |      |     | -0.05  | 0.2614   | 0.2894 | 0.3284 | 0.3489  | 0.3354    | 0.3871 | 0.4056 | 0.4264  |
|              |      |     | 0.05   | 0.2558   | 0.2804 | 0.3224 | 0.3357  | 0.3531    | 0.3954 | 0.4027 | 0.4258  |
|              |      | 0.1 | 0      | 0.2770   | 0.3047 | 0.4607 | 0.4555  | 0.3706    | 0.4079 | 0.5256 | 0.7051  |
|              |      |     | -0.05  | 0.2611   | 0.2862 | 0.5753 | 0.4379  | 0.3580    | 0.4151 | 0.6017 | 0.5898  |
|              |      |     | 0.05   | 0.2718   | 0.3047 | 0.4432 | 0.4531  | 0.4035    | 0.4669 | 0.5953 | 0.6837  |
| Quantitative | 500  | 0.3 | 0      | 0.2987   | 0.3302 | 0.4054 | 0.4347  | 0.4252    | 0.4890 | 0.5387 | 0.5668  |
|              |      |     | -0.05  | 0.2892   | 0.3214 | 0.3933 | 0.4265  | 0.4127    | 0.4765 | 0.5067 | 0.5830  |
|              |      |     | 0.05   | 0.3047   | 0.3377 | 0.4085 | 0.4360  | 0.4480    | 0.5333 | 0.5497 | 0.5833  |
|              |      | 0.1 | 0      | 0.2343   | 0.2612 | 0.6025 | 0.5423  | 0.3239    | 0.3600 | 0.8201 | 0.7886  |
|              |      |     | -0.05  | 0.2238   | 0.2453 | 0.6571 | 0.5269  | 0.2724    | 0.3029 | 1.0253 | 0.7639  |
|              |      |     | 0.05   | 0.2517   | 0.2803 | 0.5456 | 0.5076  | 0.3697    | 0.4053 | 0.7974 | 0.7951  |
|              | 2000 | 0.3 | 0      | 0.1539   | 0.1657 | 0.1803 | 0.1820  | 0.1779    | 0.1975 | 0.1962 | 0.1991  |
|              |      |     | -0.05  | 0.1659   | 0.1783 | 0.1953 | 0.1970  | 0.1995    | 0.2195 | 0.2250 | 0.2282  |
|              |      |     | 0.05   | 0.1522   | 0.1641 | 0.1790 | 0.1803  | 0.2002    | 0.2156 | 0.2235 | 0.2222  |
|              |      | 0.1 | 0      | 0.2875   | 0.3174 | 0.4169 | 0.4521  | 0.3661    | 0.4312 | 0.5491 | 0.6162  |
|              |      |     | -0.05  | 0.2759   | 0.3051 | 0.4902 | 0.4897  | 0.3608    | 0.3891 | 0.6682 | 0.6535  |
|              |      |     | 0.05   | 0.3012   | 0.3287 | 0.4203 | 0.4577  | 0.3963    | 0.4475 | 0.5226 | 0.5791  |

**Table S2.** Proportions (in %) of extreme values (0 or 2) of  $\hat{\gamma}_{PF}$  and  $\hat{\gamma}_F$  among 500 replicates for quantitative trait when  $(\sigma_0^2, \sigma_1^2, \sigma_2^2) = (4, 4.8, 4)$

| $n$ | MAF  | $\rho$ | $\hat{\gamma}_{PF}$ |      |       | $\hat{\gamma}_F$ |      |       |      |
|-----|------|--------|---------------------|------|-------|------------------|------|-------|------|
|     |      |        | 0                   | 2    | Total | 0                | 2    | Total |      |
| 500 | 0.3  | 0      | 14.6                | 15.0 | 29.6  | 14.6             | 19.2 | 33.8  |      |
|     |      | -0.05  | 15.4                | 16.6 | 32.0  | 15.4             | 20.6 | 36.0  |      |
|     |      | 0.05   | 15.8                | 14.0 | 29.8  | 15.8             | 20.6 | 36.4  |      |
|     | 0.1  | 0      | 33.0                | 6.0  | 39.0  | 33.0             | 11.8 | 44.8  |      |
|     |      | -0.05  | 34.8                | 4.6  | 39.4  | 34.8             | 13.8 | 48.6  |      |
|     |      | 0.05   | 27.8                | 7.6  | 35.4  | 27.8             | 15.8 | 43.6  |      |
|     | 2000 | 0.3    | 0                   | 5.6  | 10.8  | 16.4             | 5.6  | 11.8  | 17.4 |
|     |      |        | -0.05               | 6.8  | 9.2   | 16.0             | 6.8  | 9.8   | 16.6 |
|     |      |        | 0.05                | 6.6  | 10.4  | 17.0             | 6.6  | 10.6  | 17.2 |
| 0.1 |      | 0      | 13.8                | 10.8 | 24.6  | 13.8             | 17.0 | 30.8  |      |
|     |      | -0.05  | 24.4                | 6.2  | 30.6  | 24.4             | 15.6 | 40.0  |      |
|     |      | 0.05   | 14.0                | 12.8 | 26.8  | 14.0             | 18.8 | 32.8  |      |

**Table S3.** Mean squared errors (MSEs) of point estimates  $\hat{\gamma}_{BN}$ ,  $\hat{\gamma}_{BU}$ ,  $\hat{\gamma}_{PF}$  and  $\hat{\gamma}_F$  among 500 replicates for quantitative trait when  $(\sigma_0^2, \sigma_1^2, \sigma_2^2) = (4, 4.8, 4)$

| $n$ | MAF  | $\rho$ | $\hat{\gamma}_{BN}$ | $\hat{\gamma}_{BU}$ | $\hat{\gamma}_{PF}$ | $\hat{\gamma}_F$ |        |
|-----|------|--------|---------------------|---------------------|---------------------|------------------|--------|
| 500 | 0.3  | 0      | 0.2270              | 0.2750              | 0.3457              | 0.3807           |        |
|     |      | -0.05  | 0.2106              | 0.2603              | 0.3366              | 0.3790           |        |
|     |      | 0.05   | 0.2028              | 0.2342              | 0.3203              | 0.3605           |        |
|     | 0.1  | 0      | 0.4612              | 0.5764              | 0.7257              | 0.7812           |        |
|     |      | -0.05  | 0.4847              | 0.5820              | 0.7138              | 0.7630           |        |
|     |      | 0.05   | 0.4446              | 0.5382              | 0.6334              | 0.7068           |        |
|     | 2000 | 0.3    | 0                   | 0.1052              | 0.1193              | 0.1182           | 0.1195 |
|     |      |        | -0.05               | 0.0933              | 0.1036              | 0.1193           | 0.1212 |
|     |      |        | 0.05                | 0.0959              | 0.1003              | 0.1041           | 0.1054 |
| 0.1 |      | 0      | 0.2171              | 0.2378              | 0.3659              | 0.4251           |        |
|     |      | -0.05  | 0.2870              | 0.3186              | 0.4922              | 0.5701           |        |
|     |      | 0.05   | 0.2059              | 0.2338              | 0.3709              | 0.4303           |        |

**Table S4.** Proportions (in %) of the noninformative intervals (NP), empty sets (EP) and discontinuous intervals (DP) of the 95% confidence intervals for the penalized Fieller's (PF) and Fieller's methods based on 500 replicates for quantitative trait when  $(\sigma_0^2, \sigma_1^2, \sigma_2^2) = (4, 4.8, 4)$

| $n$  | MAF | $\rho$ | PF   |     |     | Fieller |     |     |
|------|-----|--------|------|-----|-----|---------|-----|-----|
|      |     |        | NP   | EP  | DP  | NP      | EP  | DP  |
| 500  | 0.3 | 0      | 37.2 | 0.2 | 0.0 | 46.2    | 0.8 | 0.6 |
|      |     | -0.05  | 35.6 | 0.2 | 0.0 | 45.6    | 0.8 | 0.2 |
|      |     | 0.05   | 36.0 | 0.0 | 0.0 | 44.6    | 0.8 | 0.4 |
|      | 0.1 | 0      | 43.0 | 4.4 | 0.0 | 55.4    | 3.6 | 0.6 |
|      |     | -0.05  | 40.2 | 5.0 | 0.0 | 56.2    | 3.4 | 1.6 |
|      |     | 0.05   | 47.6 | 2.2 | 0.0 | 57.6    | 1.6 | 1.0 |
| 2000 | 0.3 | 0      | 2.2  | 0.2 | 0.0 | 3.0     | 0.2 | 0.0 |
|      |     | -0.05  | 3.4  | 0.4 | 0.0 | 4.8     | 0.4 | 0.0 |
|      |     | 0.05   | 1.8  | 0.2 | 0.0 | 3.4     | 0.2 | 0.0 |
|      | 0.1 | 0      | 25.8 | 3.4 | 0.0 | 30.6    | 1.2 | 0.2 |
|      |     | -0.05  | 24.0 | 5.2 | 0.0 | 31.4    | 1.6 | 0.8 |
|      |     | 0.05   | 27.8 | 1.8 | 0.0 | 33.4    | 1.6 | 0.2 |

**Table S5.** Coverage probabilities (CPs, in %) of Bayesian method with normal prior (BN), Bayesian method with uniform prior (BU), penalized Fieller's (PF) and Fieller's methods among 500 replicates for quantitative trait when  $(\sigma_0^2, \sigma_1^2, \sigma_2^2) = (4, 4.8, 4)^a$

| $n$ | MAF  | $\rho$ | BN    | BU   | PF   | Fieller |      |
|-----|------|--------|-------|------|------|---------|------|
| 500 | 0.3  | 0      | 93.6  | 95.0 | 95.8 | 95.8    |      |
|     |      | -0.05  | 96.0  | 96.4 | 95.8 | 95.4    |      |
|     |      | 0.05   | 96.0  | 95.8 | 95.6 | 95.4    |      |
|     | 0.1  | 0      | 89.8  | 91.0 | 74.6 | 87.6    |      |
|     |      | -0.05  | 90.0  | 90.8 | 72.4 | 88.6    |      |
|     |      | 0.05   | 91.4  | 90.4 | 82.4 | 92.8    |      |
|     | 2000 | 0.3    | 0     | 95.2 | 95.2 | 94.8    | 93.6 |
|     |      |        | -0.05 | 95.8 | 96.4 | 95.4    | 96.2 |
|     |      |        | 0.05  | 95.0 | 95.2 | 94.8    | 94.2 |
| 0.1 |      | 0      | 95.8  | 96.0 | 89.8 | 93.4    |      |
|     |      | -0.05  | 94.2  | 96.0 | 78.4 | 90.0    |      |
|     |      | 0.05   | 94.8  | 95.8 | 92.2 | 93.6    |      |

<sup>a</sup>The empirical CP should be between 93.05% and 96.95% ( $0.95 \pm 2 \times \sqrt{\frac{0.95 \times 0.05}{500}}$ ) with 95% probability.

**Table S6.** Mean, median, standard deviation and interquartile range of the widths of the highest posterior density intervals or confidence intervals (respectively denoted as  $W_{\text{mean}}$ ,  $W_{\text{median}}$ ,  $W_{\text{SD}}$  and  $W_{\text{IQR}}$ ) of Bayesian method with normal prior (BN), Bayesian method with uniform prior (BU), penalized Fieller's (PF) and Fieller's methods among 500 replicates for quantitative trait when  $(\sigma_0^2, \sigma_1^2, \sigma_2^2) = (4, 4.8, 4)$

| $n$  | MAF | $\rho$ | $W_{\text{mean}}$ |        |        | $W_{\text{median}}$ |        |        | $W_{\text{SD}}$ |         |        | $W_{\text{IQR}}$ |        |         |        |        |        |         |
|------|-----|--------|-------------------|--------|--------|---------------------|--------|--------|-----------------|---------|--------|------------------|--------|---------|--------|--------|--------|---------|
|      |     |        | BN                | BU     | PF     | Fieller             | BN     | BU     | PF              | Fieller | BN     | BU               | PF     | Fieller | BN     | BU     | PF     | Fieller |
| 500  | 0.3 | 0      | 1.5487            | 1.5801 | 1.6045 | 1.6220              | 1.6307 | 1.6754 | 1.7496          | 1.8686  | 0.2577 | 0.2835           | 0.4488 | 0.4820  | 0.3303 | 0.3587 | 0.6838 | 0.6515  |
|      |     | -0.05  | 1.5606            | 1.5920 | 1.6120 | 1.6455              | 1.6377 | 1.6920 | 1.7584          | 1.9083  | 0.2469 | 0.2731           | 0.4348 | 0.4619  | 0.3389 | 0.3619 | 0.6688 | 0.6436  |
|      |     | 0.05   | 1.5267            | 1.5541 | 1.5785 | 1.5952              | 1.5892 | 1.6352 | 1.7245          | 1.8691  | 0.2568 | 0.2835           | 0.4669 | 0.5036  | 0.3869 | 0.4278 | 0.7326 | 0.7266  |
|      | 0.1 | 0      | 1.6286            | 1.6643 | 1.4188 | 1.6680              | 1.7050 | 1.7559 | 1.8836          | 2.0000  | 0.2282 | 0.2508           | 0.7149 | 0.5577  | 0.2130 | 0.2181 | 1.2395 | 0.4566  |
|      |     | -0.05  | 1.6324            | 1.6664 | 1.3431 | 1.6776              | 1.7088 | 1.7589 | 1.7973          | 2.0000  | 0.2238 | 0.2485           | 0.7469 | 0.5442  | 0.2032 | 0.2094 | 1.3719 | 0.4237  |
|      |     | 0.05   | 1.6586            | 1.6772 | 1.5402 | 1.7247              | 1.7320 | 1.7651 | 1.9620          | 2.0000  | 0.1947 | 0.2344           | 0.6395 | 0.4791  | 0.1890 | 0.2325 | 0.9492 | 0.3603  |
| 2000 | 0.3 | 0      | 1.1235            | 1.1324 | 1.1426 | 1.1524              | 1.1366 | 1.1445 | 1.1383          | 1.1372  | 0.2877 | 0.3188           | 0.3775 | 0.3997  | 0.3839 | 0.4515 | 0.4820 | 0.5226  |
|      |     | -0.05  | 1.1284            | 1.1353 | 1.1591 | 1.1736              | 1.1308 | 1.1357 | 1.1709          | 1.1650  | 0.3047 | 0.3362           | 0.3987 | 0.4219  | 0.4316 | 0.4964 | 0.5127 | 0.5295  |
|      |     | 0.05   | 1.0863            | 1.1034 | 1.1079 | 1.1175              | 1.0812 | 1.1142 | 1.1053          | 1.1128  | 0.2847 | 0.3202           | 0.3762 | 0.4011  | 0.3856 | 0.4379 | 0.4862 | 0.5064  |
|      | 0.1 | 0      | 1.4946            | 1.5232 | 1.5189 | 1.5753              | 1.5460 | 1.5911 | 1.7188          | 1.6996  | 0.2473 | 0.2743           | 0.5683 | 0.4777  | 0.3519 | 0.3832 | 0.6458 | 0.6344  |
|      |     | -0.05  | 1.5145            | 1.5420 | 1.3606 | 1.5882              | 1.5579 | 1.6016 | 1.6848          | 1.7286  | 0.2509 | 0.2781           | 0.6987 | 0.4850  | 0.3234 | 0.3491 | 1.2325 | 0.5917  |
|      |     | 0.05   | 1.4653            | 1.4896 | 1.5391 | 1.5620              | 1.5288 | 1.5754 | 1.6701          | 1.6618  | 0.2819 | 0.3122           | 0.5136 | 0.4876  | 0.4172 | 0.4607 | 0.6730 | 0.6801  |

**Table S7.** Proportions (in %) of extreme values (0 or 2) of  $\hat{\gamma}_{PF}$  and  $\hat{\gamma}_F$  among 500 replicates for qualitative trait and quantitative trait when  $(\sigma_0^2, \sigma_1^2, \sigma_2^2) = (1, 1.2, 1)$  with a covariate and  $\rho = 0$

| Trait        | $n$  | MAF | $\hat{\gamma}_{PF}$ |      |       | $\hat{\gamma}_F$ |      |       |
|--------------|------|-----|---------------------|------|-------|------------------|------|-------|
|              |      |     | 0                   | 2    | Total | 0                | 2    | Total |
| Qualitative  | 500  | 0.3 | 15.2                | 16.0 | 31.2  | 15.2             | 18.6 | 33.8  |
|              |      | 0.1 | 33.4                | 4.6  | 38.0  | 33.4             | 11.0 | 44.4  |
|              | 2000 | 0.3 | 5.2                 | 9.4  | 14.6  | 5.2              | 9.6  | 14.8  |
|              |      | 0.1 | 16.8                | 10.4 | 27.2  | 16.8             | 16.0 | 32.8  |
| Quantitative | 500  | 0.3 | 8.4                 | 11.2 | 19.6  | 8.4              | 11.4 | 19.8  |
|              |      | 0.1 | 18.6                | 12.2 | 30.8  | 18.6             | 18.4 | 37.0  |
|              | 2000 | 0.3 | 2.6                 | 6.2  | 8.8   | 2.6              | 6.2  | 8.8   |
|              |      | 0.1 | 4.6                 | 10.4 | 15.0  | 4.6              | 11.8 | 16.4  |

**Table S8.** Mean squared errors (MSEs) of point estimates  $\hat{\gamma}_{BN}$ ,  $\hat{\gamma}_{BU}$ ,  $\hat{\gamma}_{PF}$  and  $\hat{\gamma}_F$  among 500 replicates for qualitative trait and quantitative trait when  $(\sigma_0^2, \sigma_1^2, \sigma_2^2) = (1, 1.2, 1)$  with a covariate and  $\rho = 0$

| Trait        | $n$  | MAF | $\hat{\gamma}_{BN}$ | $\hat{\gamma}_{BU}$ | $\hat{\gamma}_{PF}$ | $\hat{\gamma}_F$ |
|--------------|------|-----|---------------------|---------------------|---------------------|------------------|
| Qualitative  | 500  | 0.3 | 0.2398              | 0.2920              | 0.3738              | 0.4008           |
|              |      | 0.1 | 0.5163              | 0.5991              | 0.6940              | 0.7463           |
|              | 2000 | 0.3 | 0.0993              | 0.1101              | 0.1318              | 0.1351           |
|              |      | 0.1 | 0.2636              | 0.2840              | 0.3560              | 0.4113           |
| Quantitative | 500  | 0.3 | 0.0970              | 0.1046              | 0.1148              | 0.1168           |
|              |      | 0.1 | 0.2276              | 0.2572              | 0.3883              | 0.4591           |
|              | 2000 | 0.3 | 0.0321              | 0.0335              | 0.0348              | 0.0349           |
|              |      | 0.1 | 0.0937              | 0.0991              | 0.1272              | 0.1520           |

**Table S9.** Proportions (in %) of the noninformative intervals (NP), empty sets (EP) and discontinuous intervals (DP) of the 95% confidence intervals for the penalized Fieller's (PF) and Fieller's methods based on 500 replicates for qualitative trait and quantitative trait when  $(\sigma_0^2, \sigma_1^2, \sigma_2^2) = (1, 1.2, 1)$  with a covariate and  $\rho = 0$

| Trait        | $n$  | MAF | PF   |     |     | Fieller |     |     |
|--------------|------|-----|------|-----|-----|---------|-----|-----|
|              |      |     | NP   | EP  | DP  | NP      | EP  | DP  |
| Qualitative  | 500  | 0.3 | 30.4 | 0.8 | 0.0 | 40.2    | 2.6 | 0.6 |
|              |      | 0.1 | 47.8 | 2.2 | 0.0 | 66.2    | 0.0 | 0.8 |
|              | 2000 | 0.3 | 2.2  | 0.6 | 0.0 | 3.2     | 1.0 | 0.0 |
|              |      | 0.1 | 22.2 | 3.4 | 0.0 | 31.2    | 0.8 | 0.4 |
| Quantitative | 500  | 0.3 | 4.2  | 0.0 | 0.0 | 7.6     | 0.2 | 0.2 |
|              |      | 0.1 | 31.6 | 3.2 | 0.0 | 35.0    | 2.6 | 0.8 |
|              | 2000 | 0.3 | 0.0  | 0.0 | 0.0 | 0.0     | 0.0 | 0.0 |
|              |      | 0.1 | 5.6  | 0.0 | 0.0 | 10.2    | 0.2 | 0.0 |

**Table S10.** Coverage probabilities (CPs, in %) and the mean and median of the widths of the highest posterior density intervals or confidence intervals (respectively denoted as  $W_{\text{mean}}$  and  $W_{\text{median}}$ ) of Bayesian method with normal prior (BN), Bayesian method with uniform prior (BU), penalized Fieller's (PF) and Fieller's methods among 500 replicates for qualitative trait and quantitative trait when  $(\sigma_0^2, \sigma_1^2, \sigma_2^2) = (1, 1.2, 1)$  with a covariate and  $\rho = 0$  <sup>a</sup>

| Trait        | $n$  | CP  |      |      |      |         | $W_{\text{mean}}$ |        |        |         | $W_{\text{median}}$ |        |        |         |
|--------------|------|-----|------|------|------|---------|-------------------|--------|--------|---------|---------------------|--------|--------|---------|
|              |      | MAF | BN   | BU   | PF   | Fieller | BN                | BU     | PF     | Fieller | BN                  | BU     | PF     | Fieller |
| Qualitative  | 500  | 0.3 | 94.8 | 95.8 | 94.2 | 92.8    | 1.5325            | 1.5618 | 1.5484 | 1.5657  | 1.5990              | 1.6472 | 1.6573 | 1.7683  |
|              |      | 0.1 | 89.6 | 91.2 | 84.8 | 97.6    | 1.6336            | 1.6845 | 1.5217 | 1.8637  | 1.7250              | 1.7772 | 1.9712 | 2.0000  |
|              | 2000 | 0.3 | 94.4 | 94.4 | 93.8 | 93.0    | 1.1272            | 1.1370 | 1.1463 | 1.1616  | 1.1259              | 1.1269 | 1.1285 | 1.1385  |
|              |      | 0.1 | 93.8 | 94.8 | 88.8 | 95.2    | 1.5065            | 1.5328 | 1.4680 | 1.6200  | 1.5427              | 1.5807 | 1.6835 | 1.7194  |
| Quantitative | 500  | 0.3 | 96.4 | 96.2 | 97.6 | 97.2    | 1.1177            | 1.1234 | 1.2226 | 1.2451  | 1.1250              | 1.1301 | 1.2320 | 1.2507  |
|              |      | 0.1 | 94.4 | 96.0 | 87.8 | 92.0    | 1.5020            | 1.5295 | 1.4999 | 1.5558  | 1.5334              | 1.5822 | 1.7555 | 1.7548  |
|              | 2000 | 0.3 | 94.2 | 94.8 | 97.0 | 97.0    | 0.6562            | 0.6589 | 0.7344 | 0.7363  | 0.6676              | 0.6689 | 0.7470 | 0.7495  |
|              |      | 0.1 | 96.6 | 97.2 | 97.6 | 96.4    | 1.1853            | 1.1965 | 1.2969 | 1.3128  | 1.2032              | 1.2279 | 1.3362 | 1.3371  |

<sup>a</sup>The empirical CP should be between 93.05% and 96.95% ( $0.95 \pm 2 \times \sqrt{\frac{0.95 \times 0.05}{500}}$ ) with 95% probability.

**Table S11.** Standard deviation and interquartile range of the widths of the highest posterior density intervals or confidence intervals (respectively denoted as  $W_{SD}$  and  $W_{IQR}$ ) of Bayesian method with normal prior (BN), Bayesian method with uniform prior (BU), penalized Fieller's (PF) and Fieller's methods among 500 replicates for qualitative trait and quantitative trait when  $(\sigma_0^2, \sigma_1^2, \sigma_2^2) = (1, 1.2, 1)$  with a covariate and  $\rho = 0$

| Trait        | $n$  | MAF | $W_{SD}$ |        |        |         | $W_{IQR}$ |        |        |         |
|--------------|------|-----|----------|--------|--------|---------|-----------|--------|--------|---------|
|              |      |     | BN       | BU     | PF     | Fieller | BN        | BU     | PF     | Fieller |
| Qualitative  | 500  | 0.3 | 0.2631   | 0.2896 | 0.4764 | 0.5243  | 0.3589    | 0.3933 | 0.7472 | 0.7382  |
|              |      | 0.1 | 0.2547   | 0.2576 | 0.6829 | 0.3062  | 0.1682    | 0.1627 | 1.0447 | 0.0971  |
|              | 2000 | 0.3 | 0.2937   | 0.3259 | 0.3956 | 0.4209  | 0.4170    | 0.4882 | 0.5103 | 0.5371  |
|              |      | 0.1 | 0.2391   | 0.2678 | 0.5993 | 0.4352  | 0.3073    | 0.3397 | 0.7207 | 0.5674  |
| Quantitative | 500  | 0.3 | 0.3024   | 0.3341 | 0.4239 | 0.4562  | 0.4280    | 0.5049 | 0.5614 | 0.6334  |
|              |      | 0.1 | 0.2430   | 0.2700 | 0.6009 | 0.5414  | 0.3448    | 0.3834 | 0.8271 | 0.6648  |
|              | 2000 | 0.3 | 0.1616   | 0.1742 | 0.2029 | 0.2064  | 0.1980    | 0.2200 | 0.2365 | 0.2407  |
|              |      | 0.1 | 0.2840   | 0.3117 | 0.4284 | 0.4451  | 0.3717    | 0.4335 | 0.5814 | 0.6226  |
