# Supplementary material for: BEXCIS: Bayesian methods for estimating the degree of the skewness of X chromosome inactivation
Source: Springer Nature journal article supplement (doi:10.1186/s12859-022-04721-y), 2022-05-24
Supplement: 12859_2022_4721_MOESM5_ESM.pdf [file 12859_2022_4721_MOESM5_ESM.pdf]

## Additional file 5: Supplementary Figures S45–S84

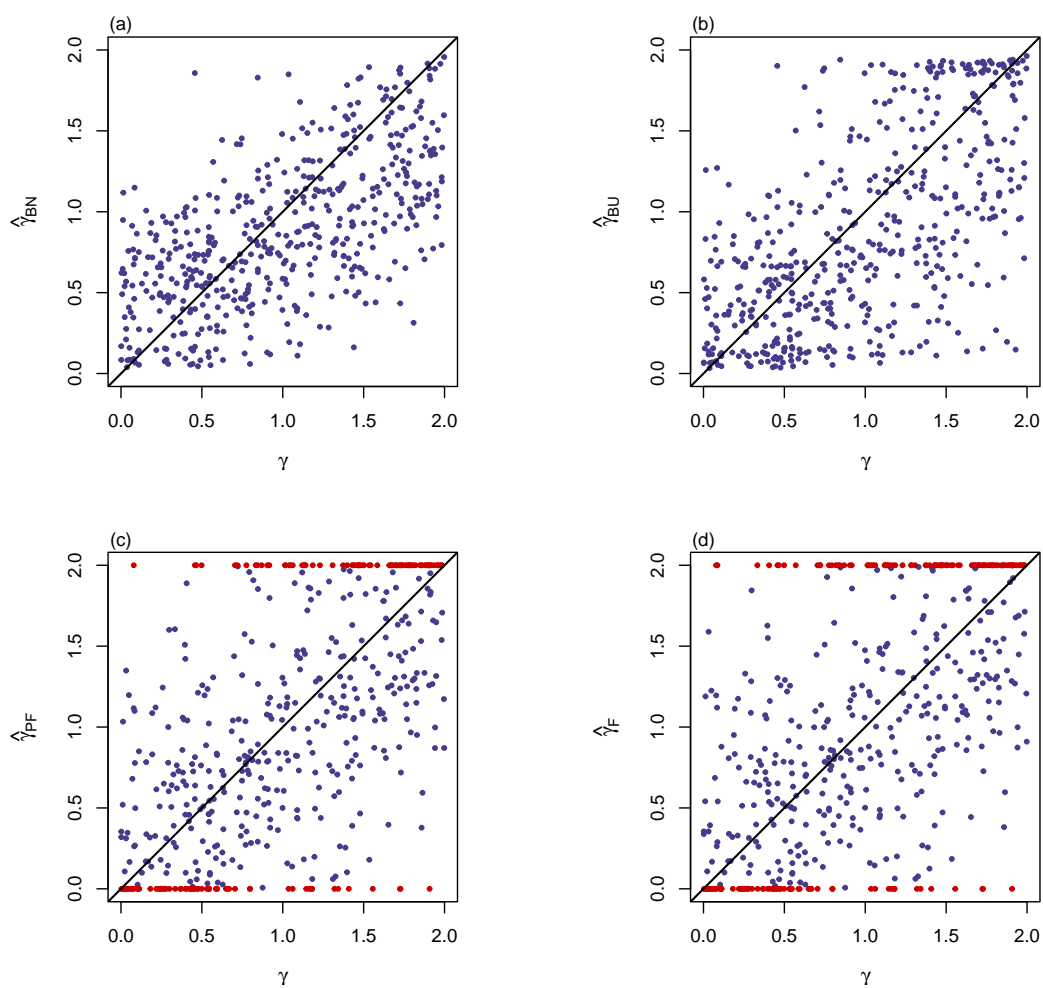

**Supplementary Figure S45** Scatter plots of point estimates of  $\gamma$  against true value of  $\gamma$  for quantitative trait when  $(\sigma_0^2, \sigma_1^2, \sigma_2^2) = (4, 4.8, 4)$  with  $n = 500$ ,  $\text{MAF} = 0.3$  and  $\rho = 0$ . The red points represent the extreme values (0 or 2). (a)  $\hat{\gamma}_{BN}$ ; (b)  $\hat{\gamma}_{BU}$ ; (c)  $\hat{\gamma}_{PF}$ ; (d)  $\hat{\gamma}_F$

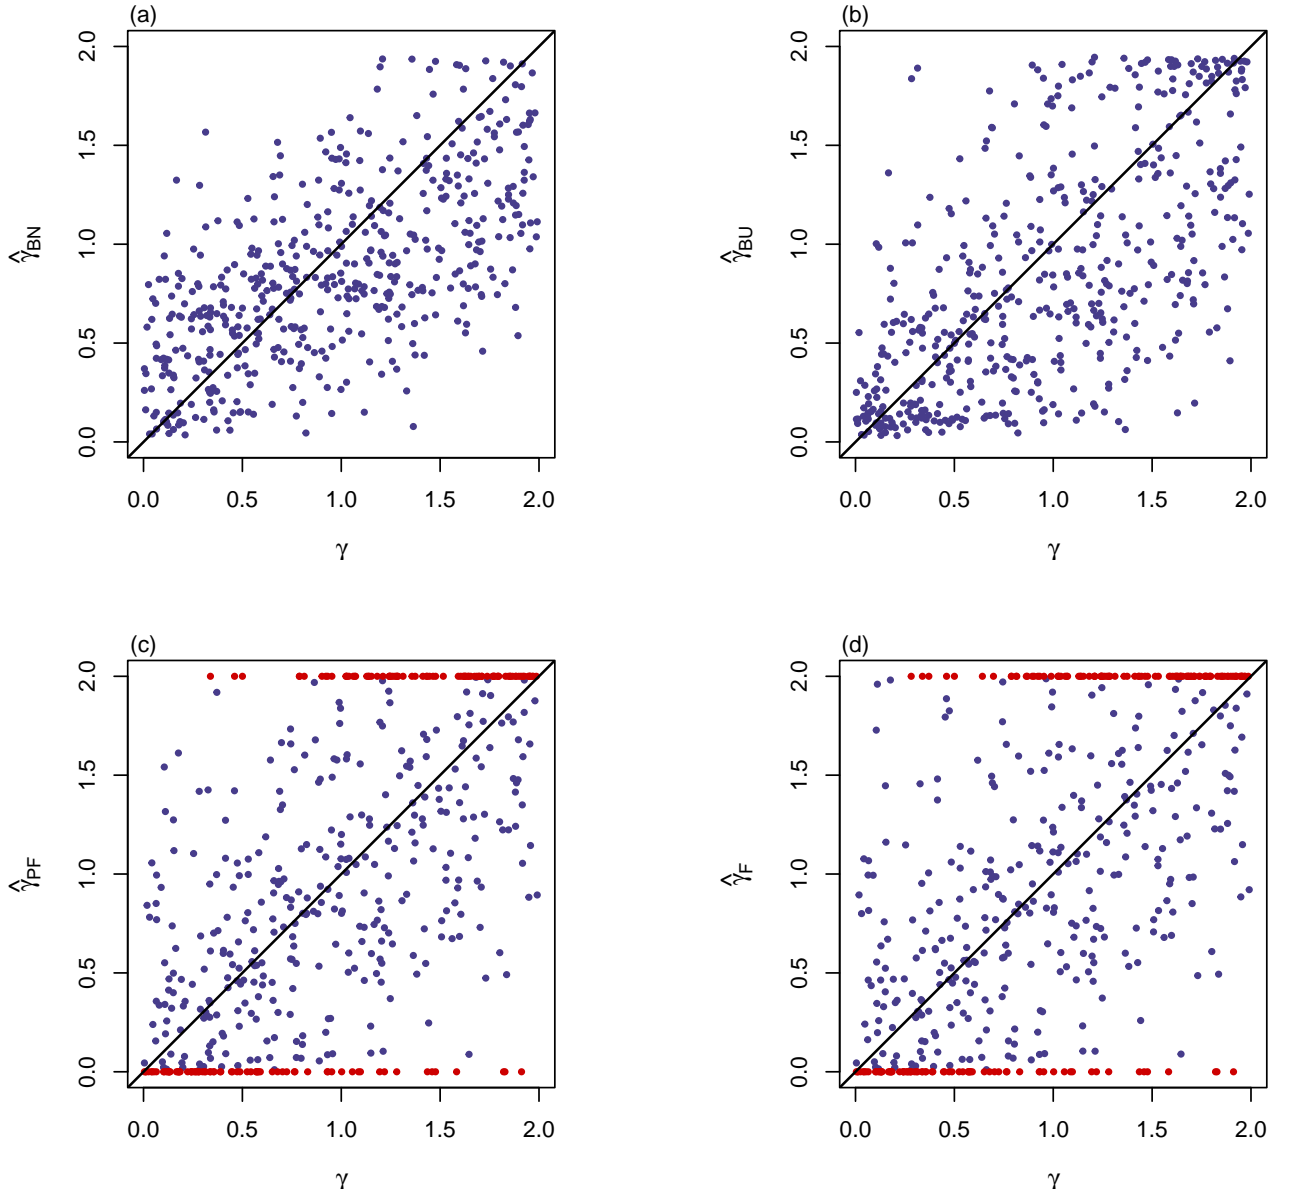

**Supplementary Figure S46** Scatter plots of point estimates of  $\gamma$  against true value of  $\gamma$  for quantitative trait when  $(\sigma_0^2, \sigma_1^2, \sigma_2^2) = (4, 4.8, 4)$  with  $n = 500$ ,  $\text{MAF} = 0.3$  and  $\rho = -0.05$ . The red points represent the extreme values (0 or 2). **(a)**  $\hat{\gamma}_{BN}$ ; **(b)**  $\hat{\gamma}_{BU}$ ; **(c)**  $\hat{\gamma}_{PF}$ ; **(d)**  $\hat{\gamma}_F$

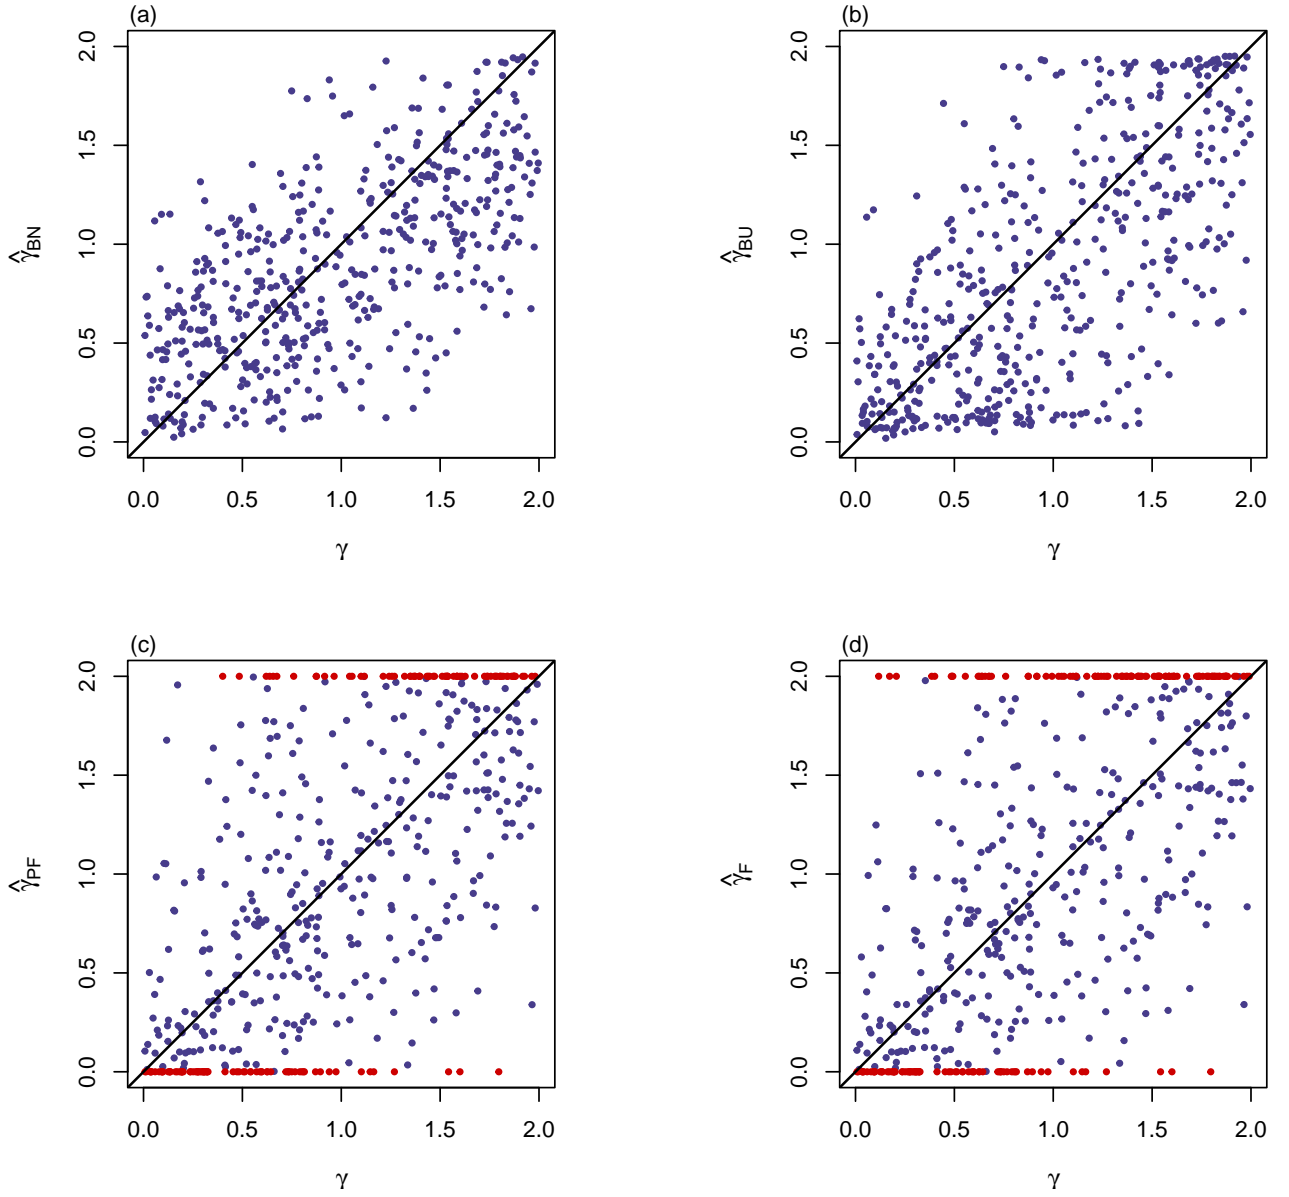

**Supplementary Figure S47** Scatter plots of point estimates of  $\gamma$  against true value of  $\gamma$  for quantitative trait when  $(\sigma_0^2, \sigma_1^2, \sigma_2^2) = (4, 4.8, 4)$  with  $n = 500$ ,  $\text{MAF} = 0.3$  and  $\rho = 0.05$ . The red points represent the extreme values (0 or 2). (a)  $\hat{\gamma}_{BN}$ ; (b)  $\hat{\gamma}_{BU}$ ; (c)  $\hat{\gamma}_{PF}$ ; (d)  $\hat{\gamma}_F$

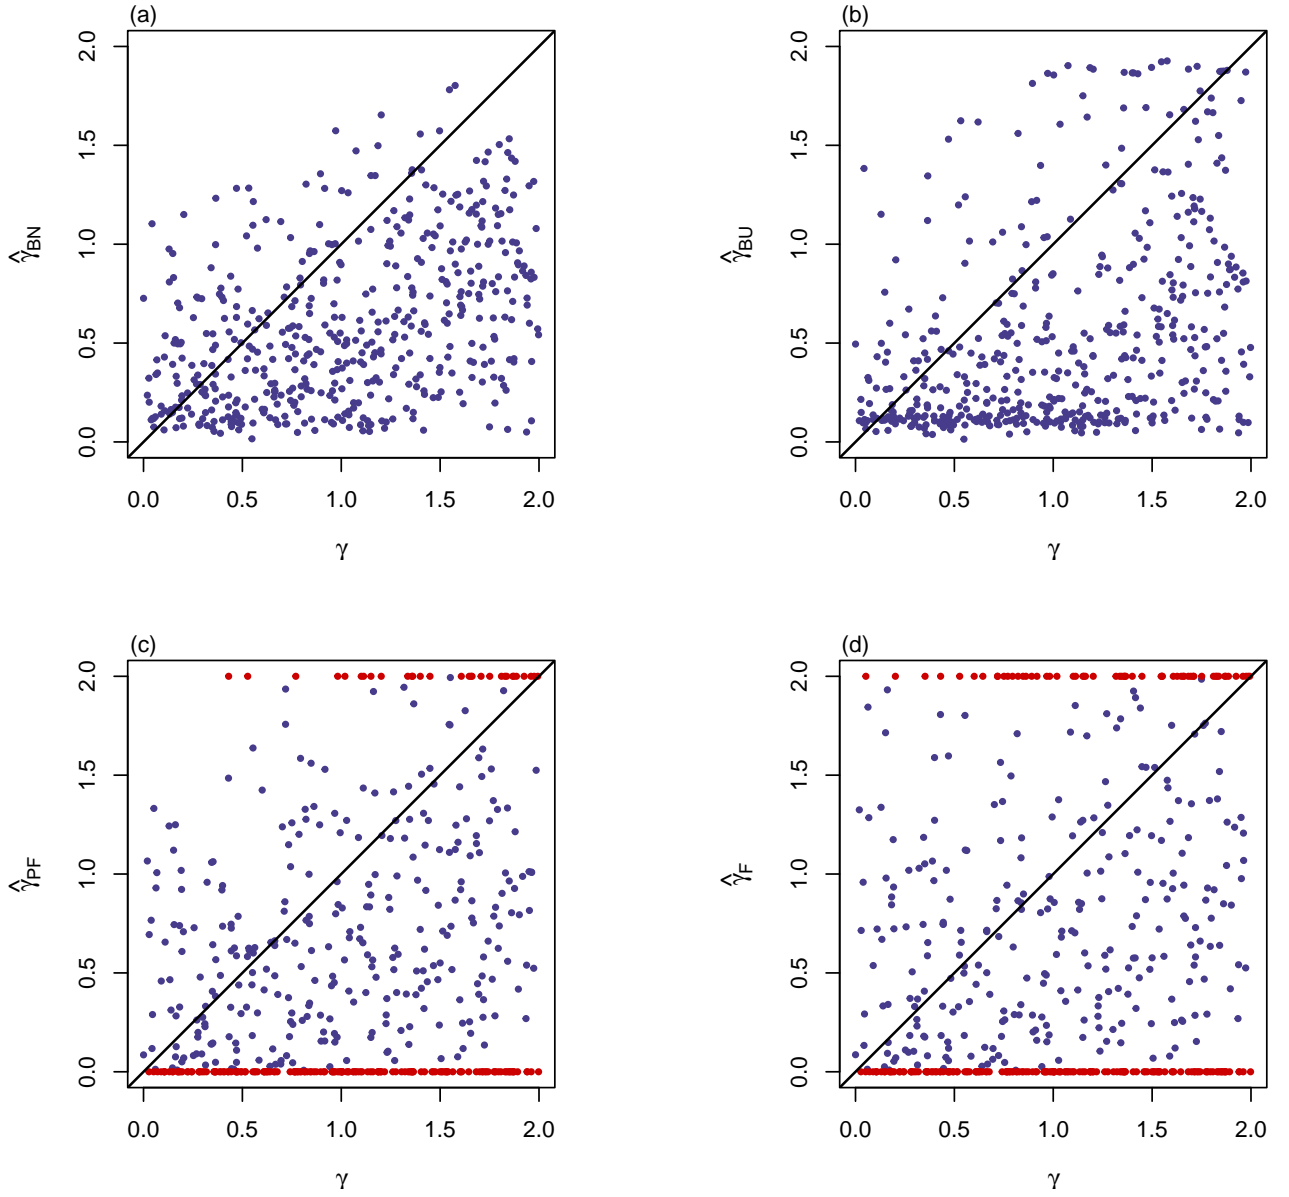

**Supplementary Figure S48** Scatter plots of point estimates of  $\gamma$  against true value of  $\gamma$  for quantitative trait when  $(\sigma_0^2, \sigma_1^2, \sigma_2^2) = (4, 4.8, 4)$  with  $n = 500$ ,  $\text{MAF} = 0.1$  and  $\rho = 0$ . The red points represent the extreme values (0 or 2). **(a)**  $\hat{\gamma}_{BN}$ ; **(b)**  $\hat{\gamma}_{BU}$ ; **(c)**  $\hat{\gamma}_{PF}$ ; **(d)**  $\hat{\gamma}_F$

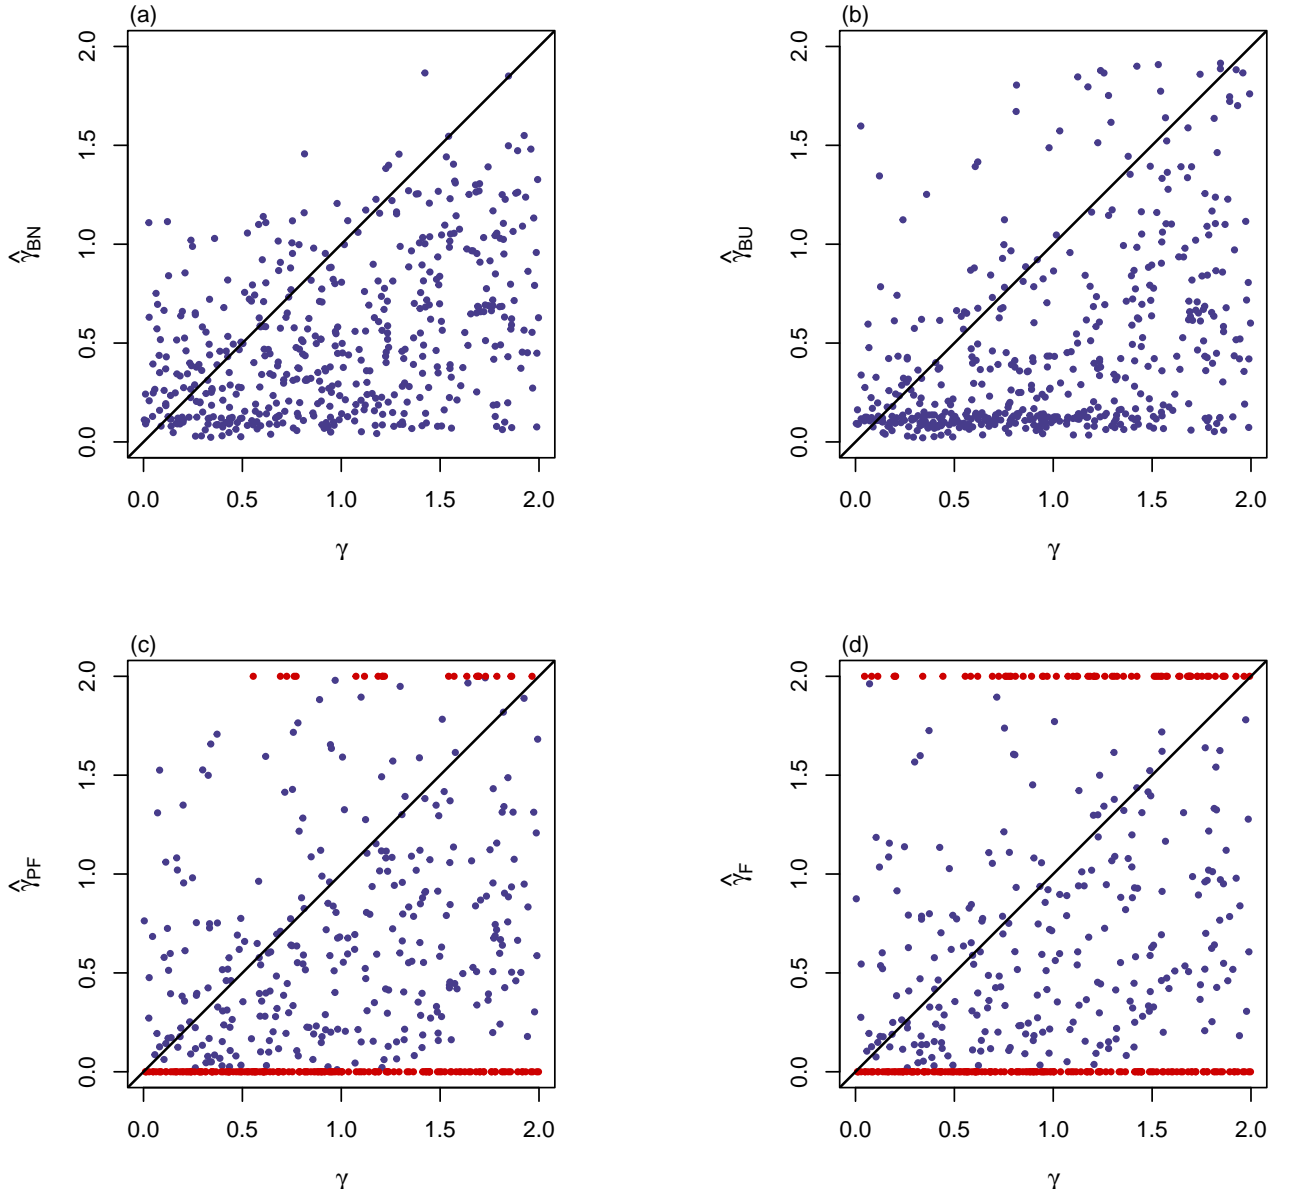

**Supplementary Figure S49** Scatter plots of point estimates of  $\gamma$  against true value of  $\gamma$  for quantitative trait when  $(\sigma_0^2, \sigma_1^2, \sigma_2^2) = (4, 4.8, 4)$  with  $n = 500$ ,  $\text{MAF} = 0.1$  and  $\rho = -0.05$ . The red points represent the extreme values (0 or 2). **(a)**  $\hat{\gamma}_{BN}$ ; **(b)**  $\hat{\gamma}_{BU}$ ; **(c)**  $\hat{\gamma}_{PF}$ ; **(d)**  $\hat{\gamma}_F$

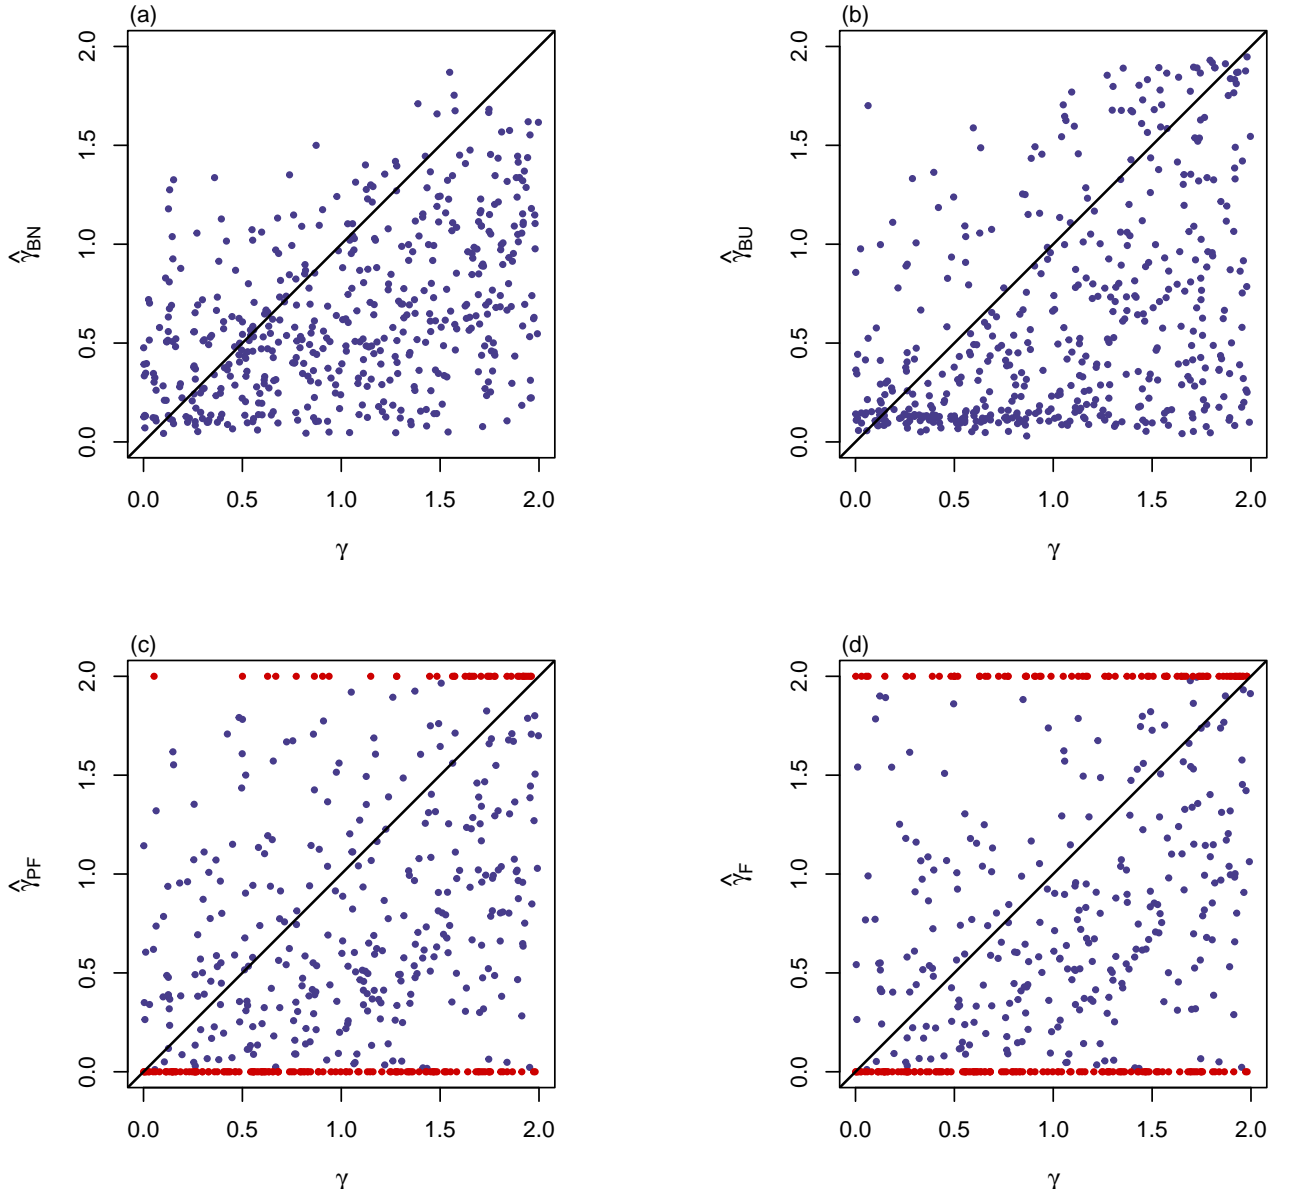

**Supplementary Figure S50** Scatter plots of point estimates of  $\gamma$  against true value of  $\gamma$  for quantitative trait when  $(\sigma_0^2, \sigma_1^2, \sigma_2^2) = (4, 4.8, 4)$  with  $n = 500$ ,  $\text{MAF} = 0.1$  and  $\rho = 0.05$ . The red points represent the extreme values (0 or 2). **(a)**  $\hat{\gamma}_{BN}$ ; **(b)**  $\hat{\gamma}_{BU}$ ; **(c)**  $\hat{\gamma}_{PF}$ ; **(d)**  $\hat{\gamma}_F$

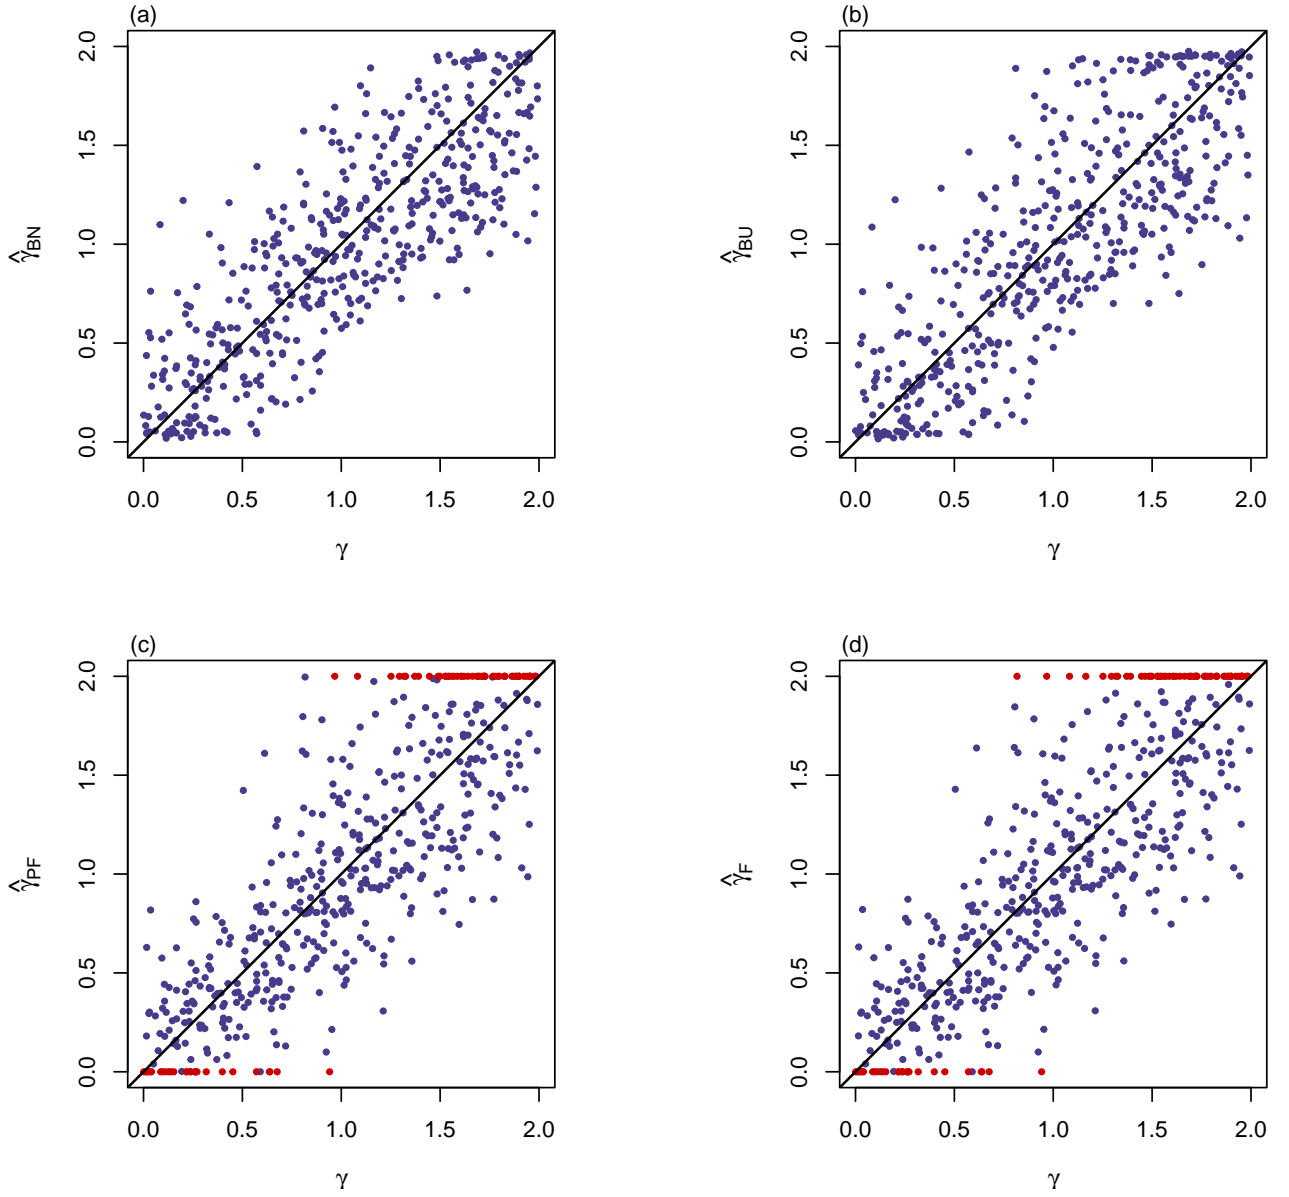

**Supplementary Figure S51** Scatter plots of point estimates of  $\gamma$  against true value of  $\gamma$  for quantitative trait when  $(\sigma_0^2, \sigma_1^2, \sigma_2^2) = (4, 4.8, 4)$  with  $n = 2000$ , MAF = 0.3 and  $\rho = 0$ . The red points represent the extreme values (0 or 2). (a)  $\hat{\gamma}_{BN}$ ; (b)  $\hat{\gamma}_{BU}$ ; (c)  $\hat{\gamma}_{PF}$ ; (d)  $\hat{\gamma}_F$

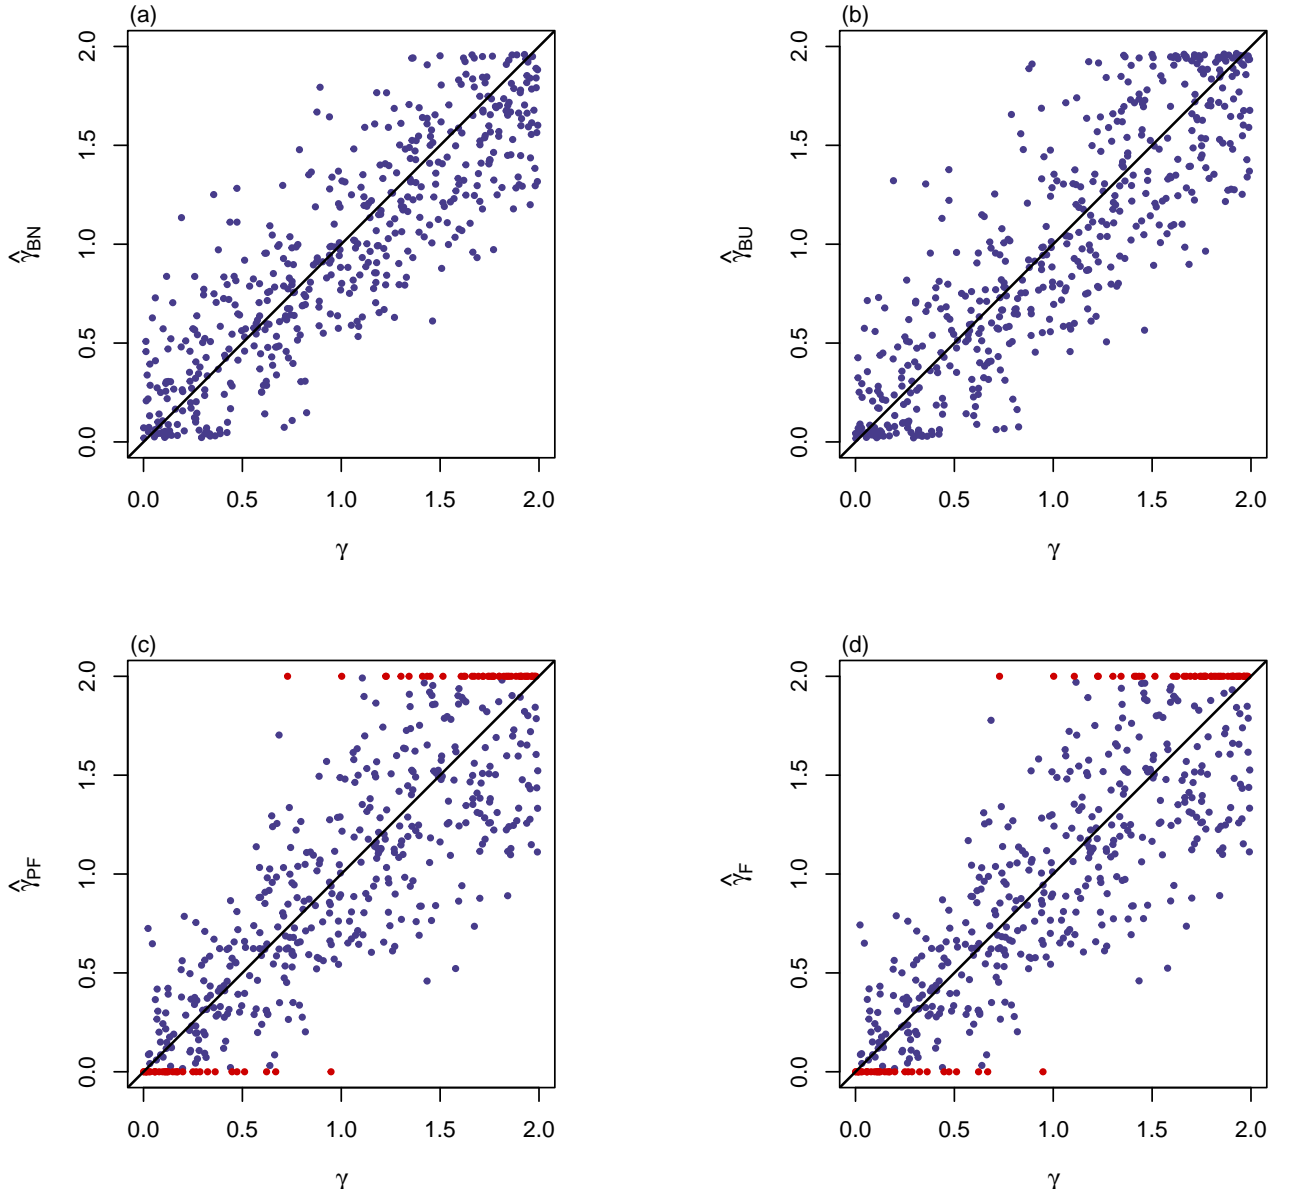

**Supplementary Figure S52** Scatter plots of point estimates of  $\gamma$  against true value of  $\gamma$  for quantitative trait when  $(\sigma_0^2, \sigma_1^2, \sigma_2^2) = (4, 4.8, 4)$  with  $n = 2000$ ,  $\text{MAF} = 0.3$  and  $\rho = -0.05$ . The red points represent the extreme values (0 or 2). **(a)**  $\hat{\gamma}_{BN}$ ; **(b)**  $\hat{\gamma}_{BU}$ ; **(c)**  $\hat{\gamma}_{PF}$ ; **(d)**  $\hat{\gamma}_F$



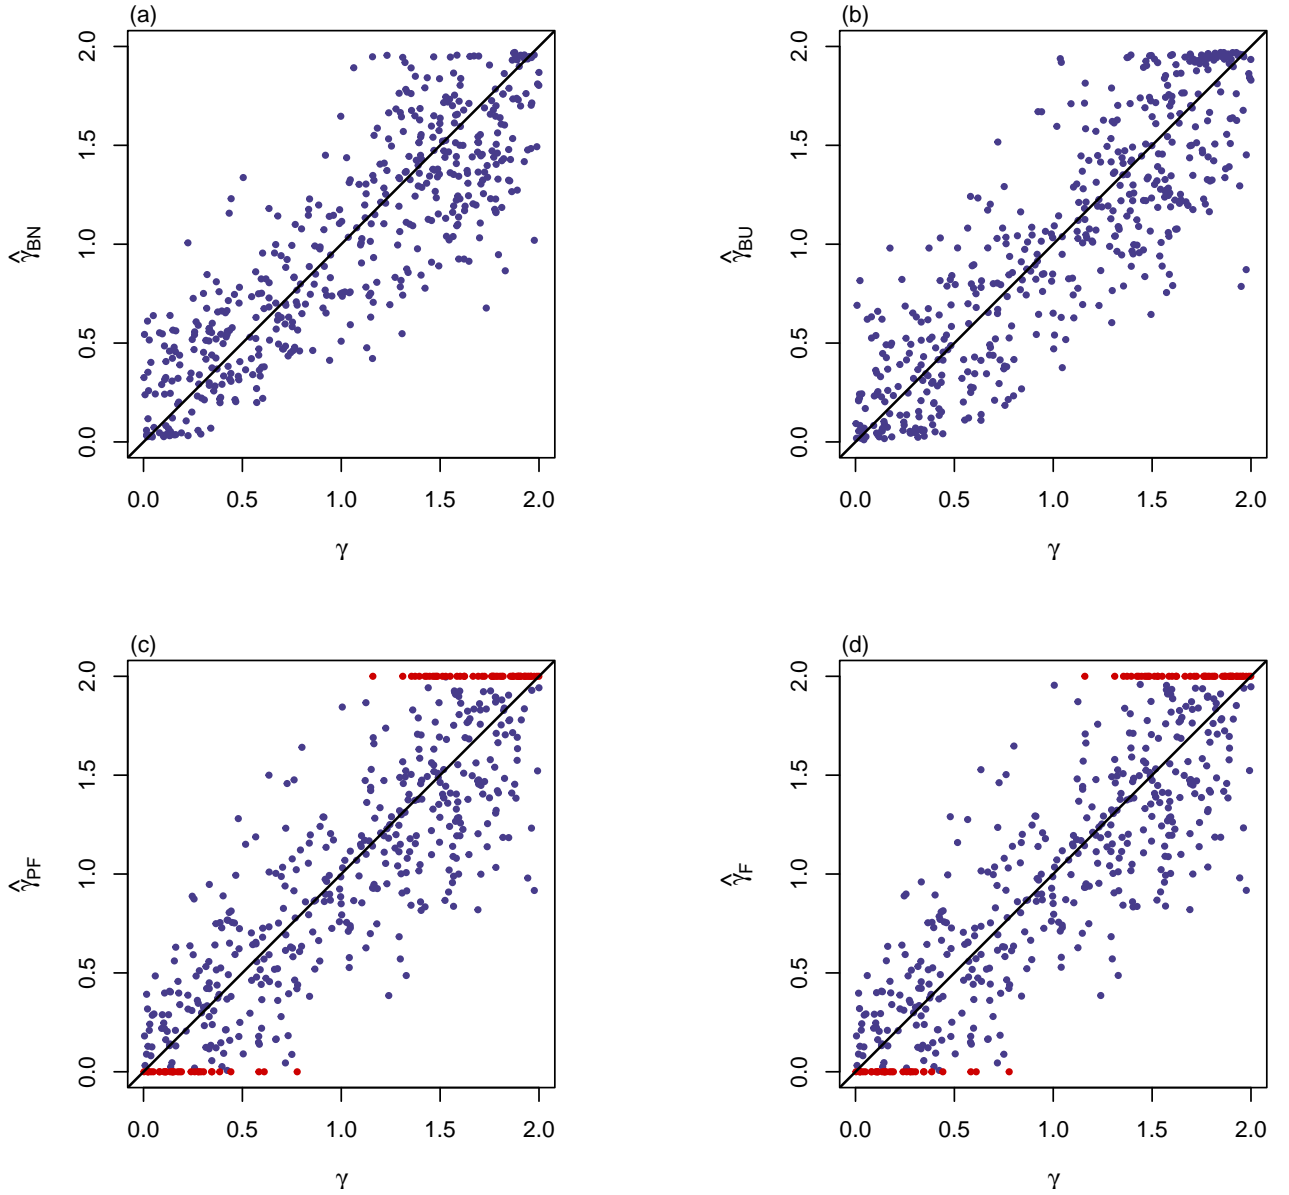

**Supplementary Figure S53** Scatter plots of point estimates of  $\gamma$  against true value of  $\gamma$  for quantitative trait when  $(\sigma_0^2, \sigma_1^2, \sigma_2^2) = (4, 4.8, 4)$  with  $n = 2000$ ,  $MAF = 0.3$  and  $\rho = 0.05$ . The red points represent the extreme values (0 or 2). **(a)**  $\hat{\gamma}_{BN}$ ; **(b)**  $\hat{\gamma}_{BU}$ ; **(c)**  $\hat{\gamma}_{PF}$ ; **(d)**  $\hat{\gamma}_F$

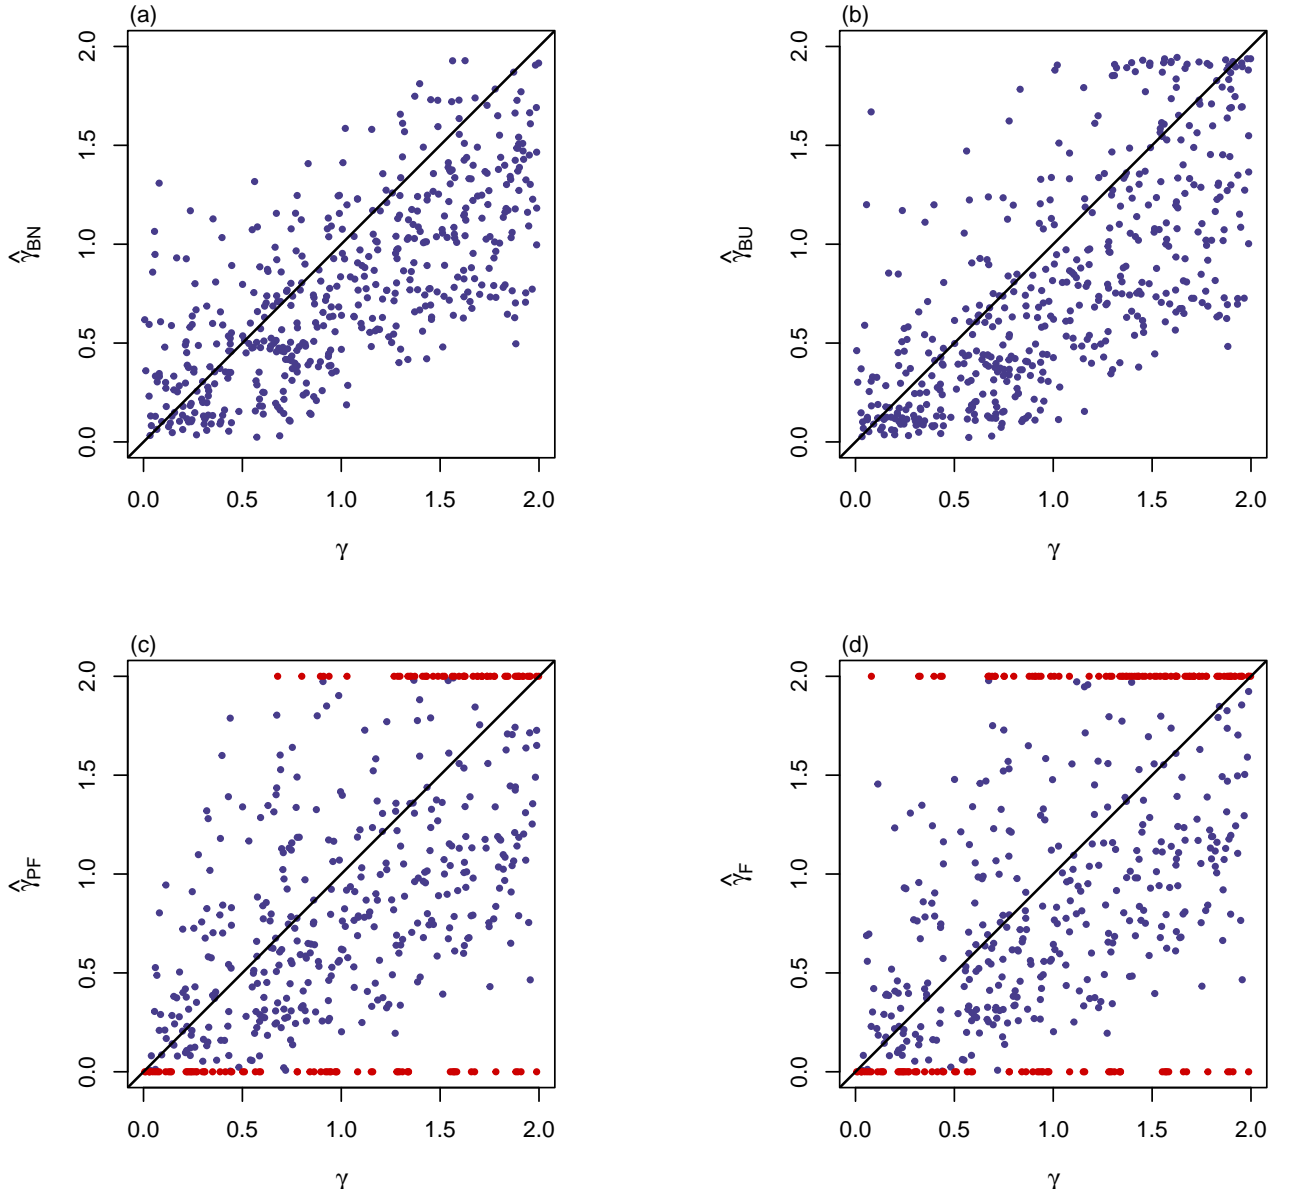

**Supplementary Figure S54** Scatter plots of point estimates of  $\gamma$  against true value of  $\gamma$  for quantitative trait when  $(\sigma_0^2, \sigma_1^2, \sigma_2^2) = (4, 4.8, 4)$  with  $n = 2000$ ,  $\text{MAF} = 0.1$  and  $\rho = 0$ . The red points represent the extreme values (0 or 2). **(a)**  $\hat{\gamma}_{BN}$ ; **(b)**  $\hat{\gamma}_{BU}$ ; **(c)**  $\hat{\gamma}_{PF}$ ; **(d)**  $\hat{\gamma}_F$

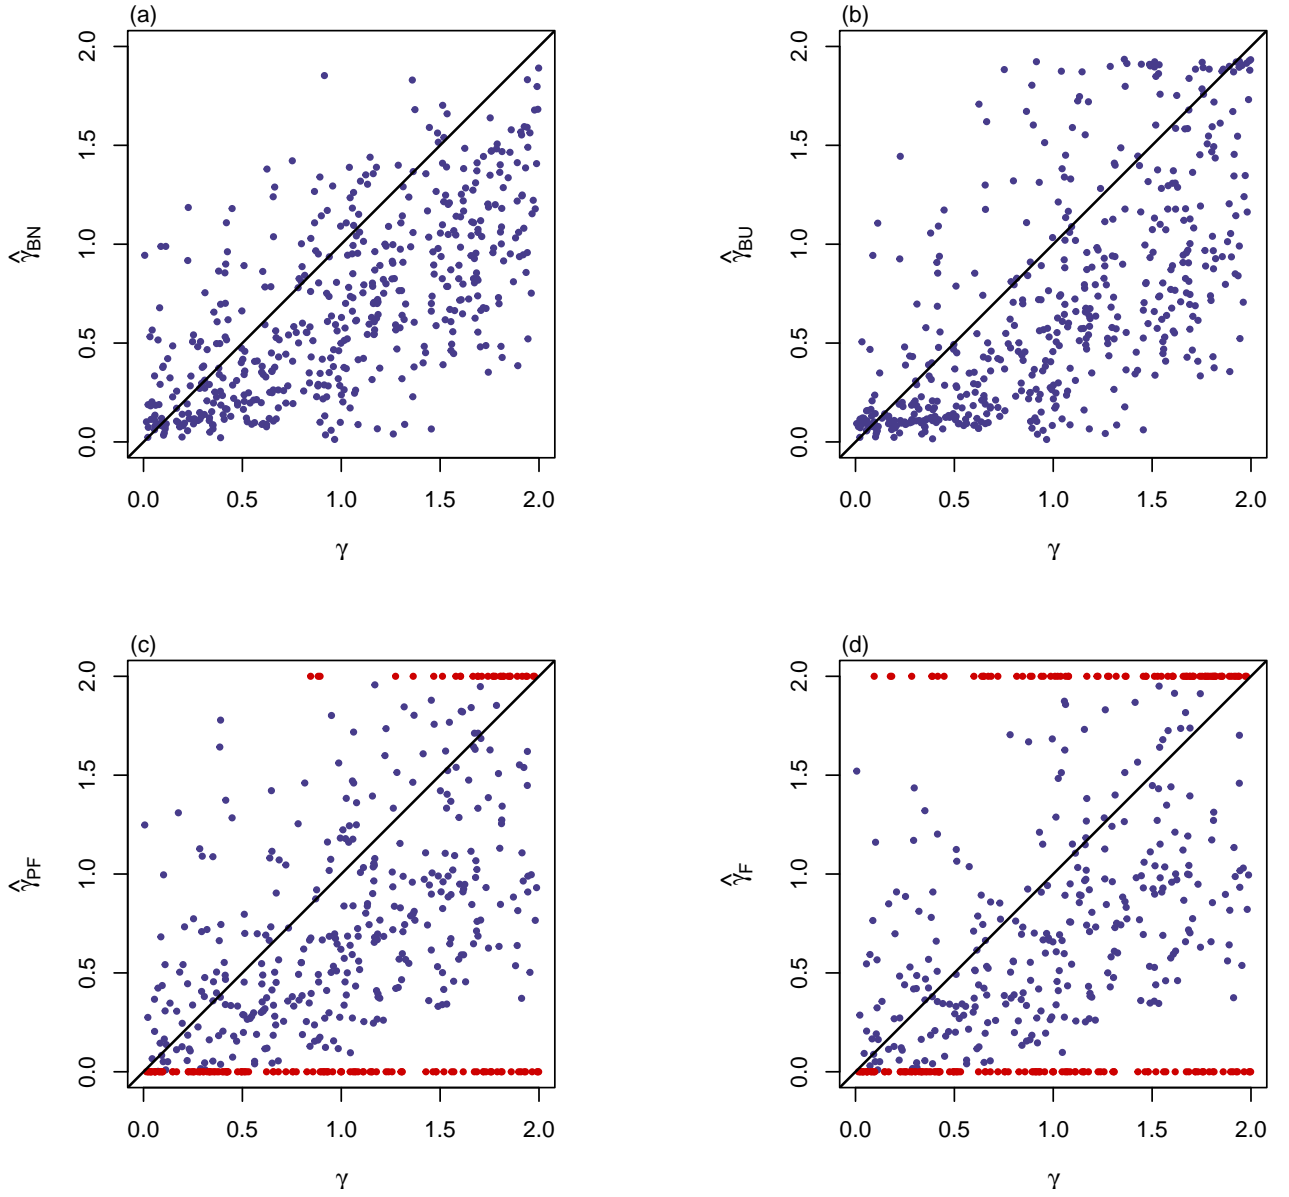

**Supplementary Figure S55** Scatter plots of point estimates of  $\gamma$  against true value of  $\gamma$  for quantitative trait when  $(\sigma_0^2, \sigma_1^2, \sigma_2^2) = (4, 4.8, 4)$  with  $n = 2000$ ,  $\text{MAF} = 0.1$  and  $\rho = -0.05$ . The red points represent the extreme values (0 or 2). **(a)**  $\hat{\gamma}_{BN}$ ; **(b)**  $\hat{\gamma}_{BU}$ ; **(c)**  $\hat{\gamma}_{PF}$ ; **(d)**  $\hat{\gamma}_F$

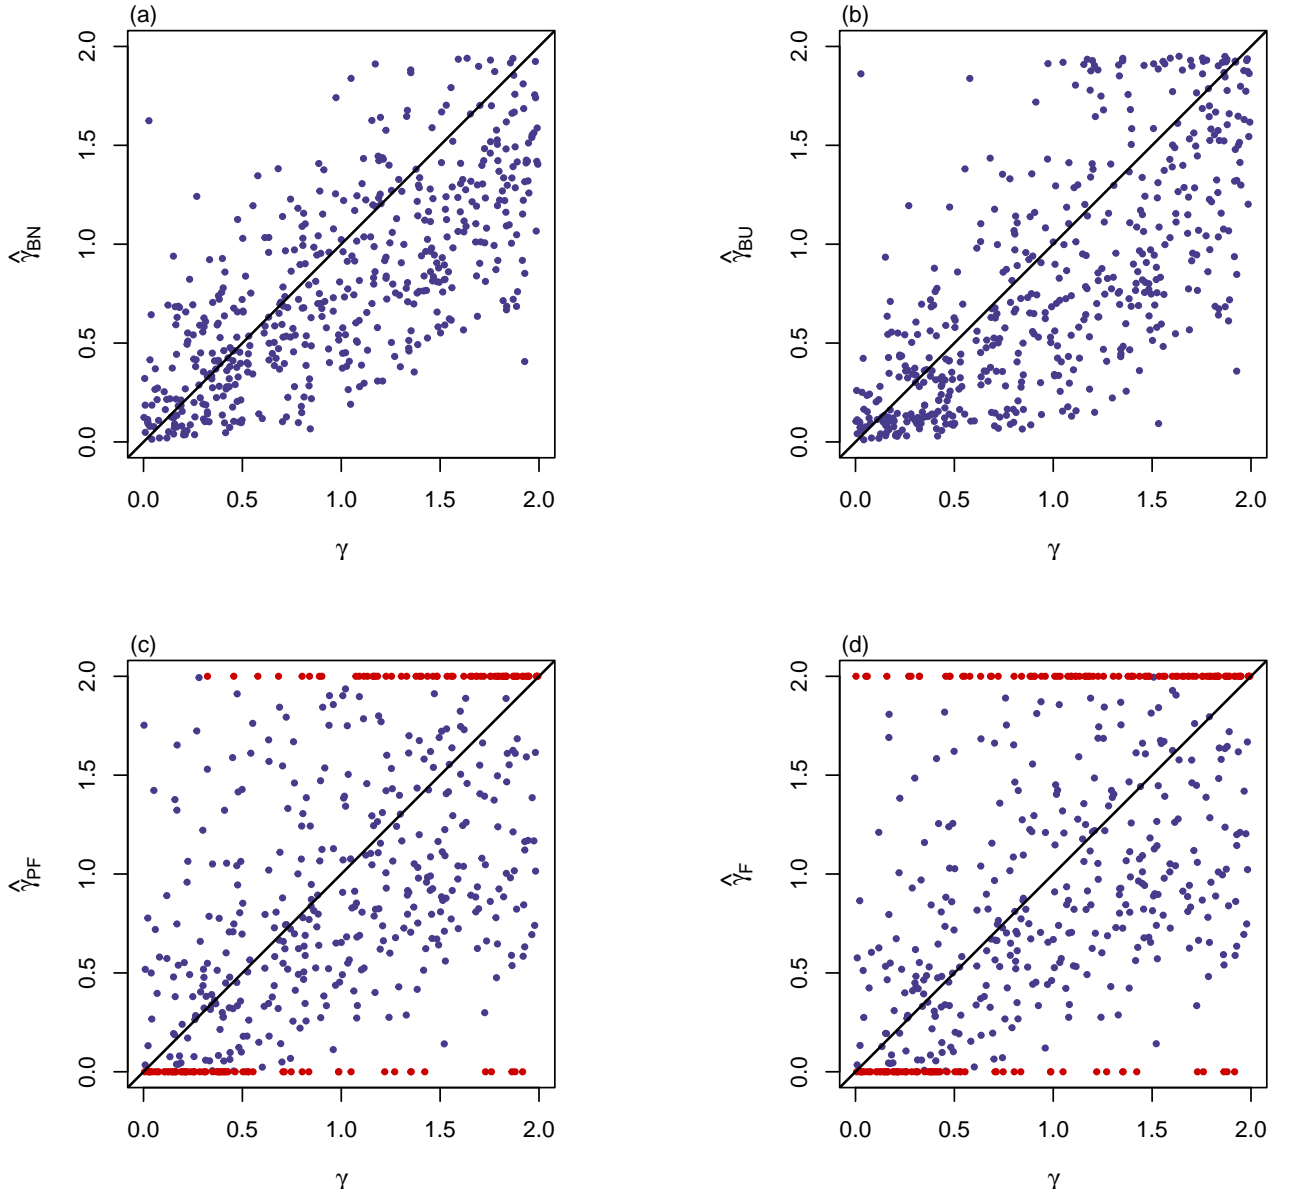

**Supplementary Figure S56** Scatter plots of point estimates of  $\gamma$  against true value of  $\gamma$  for quantitative trait when  $(\sigma_0^2, \sigma_1^2, \sigma_2^2) = (4, 4.8, 4)$  with  $n = 2000$ ,  $\text{MAF} = 0.1$  and  $\rho = 0.05$ . The red points represent the extreme values (0 or 2). **(a)**  $\hat{\gamma}_{BN}$ ; **(b)**  $\hat{\gamma}_{BU}$ ; **(c)**  $\hat{\gamma}_{PF}$ ; **(d)**  $\hat{\gamma}_F$

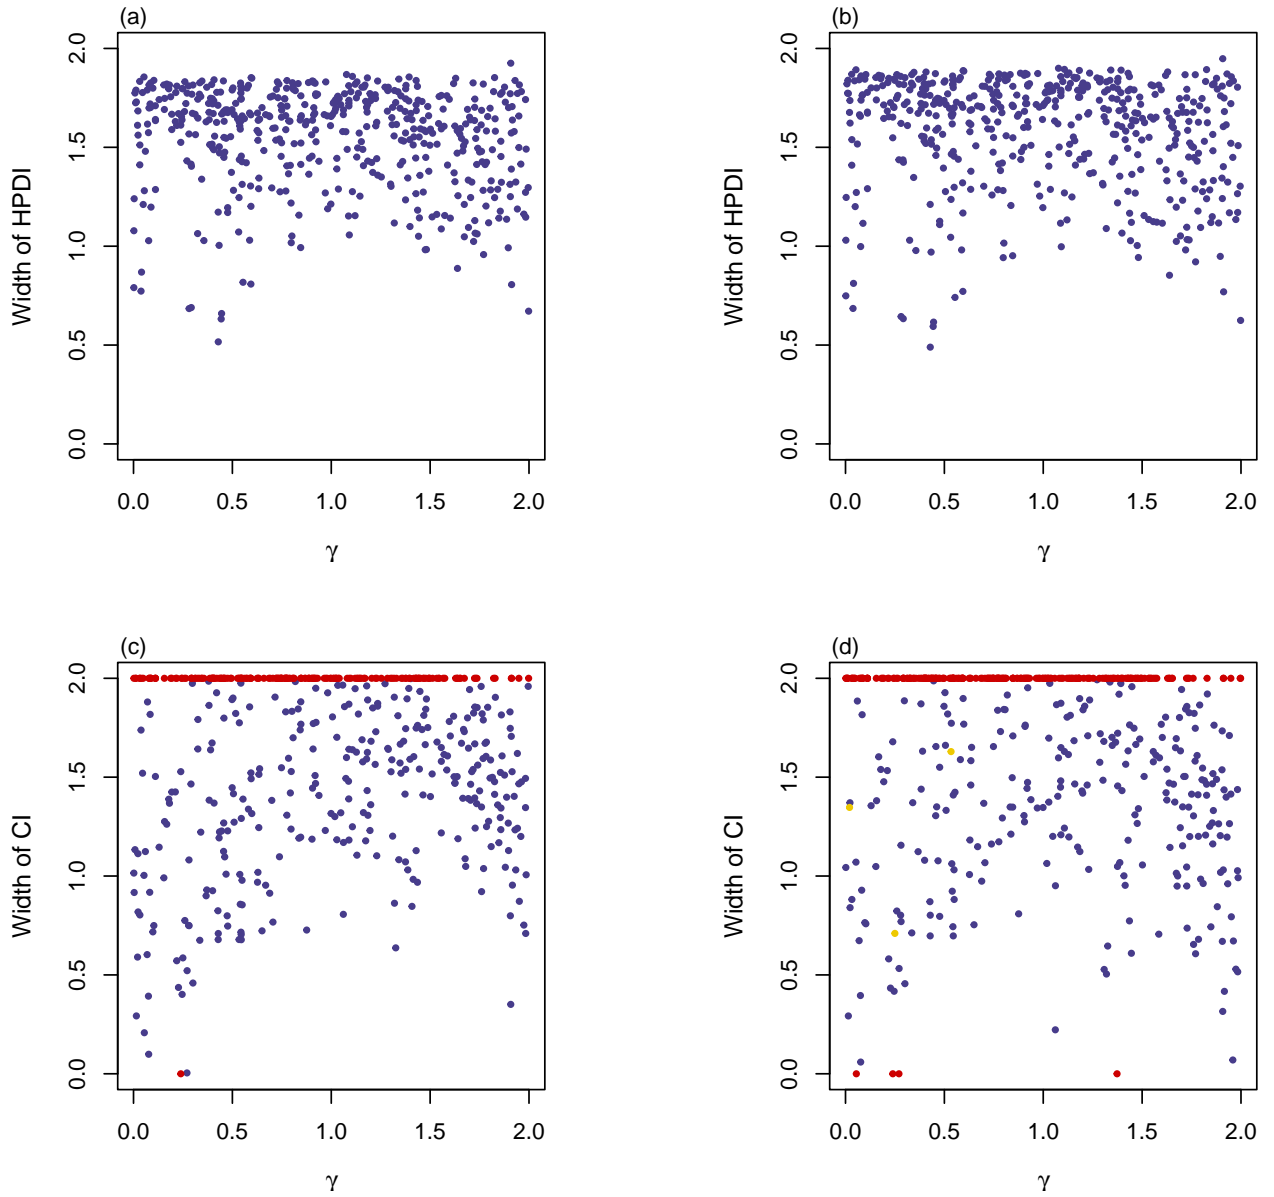

**Supplementary Figure S57** Widths of HPDIs or CIs against true value of  $\gamma$  for quantitative trait when  $(\sigma_0^2, \sigma_1^2, \sigma_2^2) = (4, 4.8, 4)$  with  $n = 500$ ,  $\text{MAF} = 0.3$  and  $\rho = 0$ . The red points represent the widths of the noninformative intervals or the empty sets, and the yellow points represent the widths of the discontinuous intervals. **(a)** BN method; **(b)** BU method; **(c)** PF method; **(d)** Fieller's method

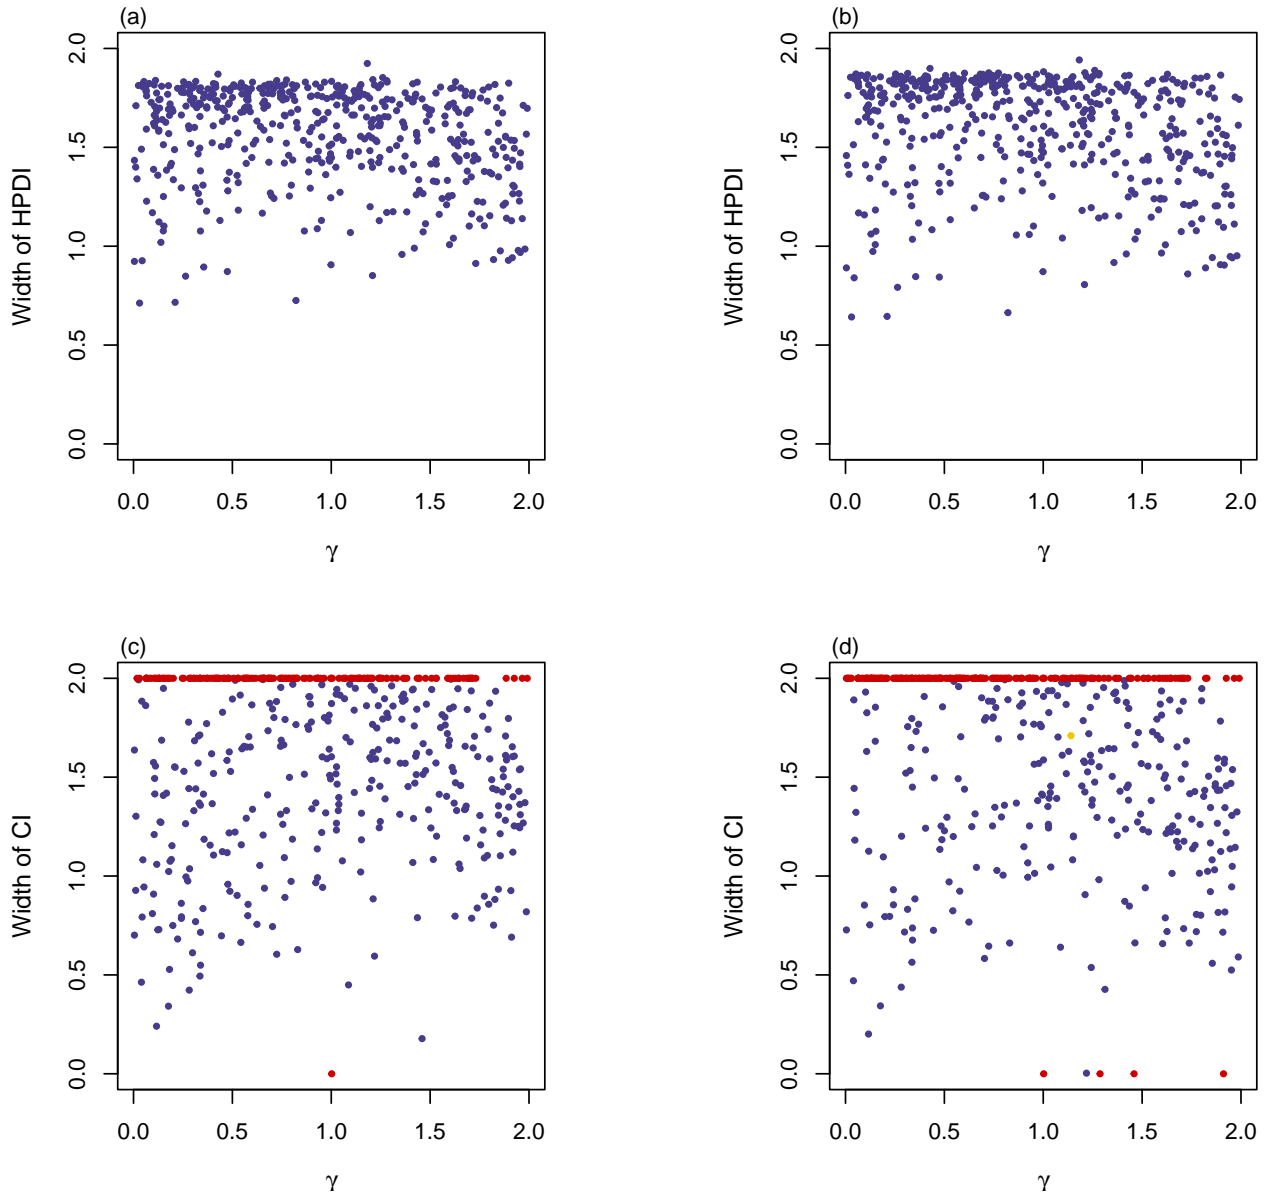

**Supplementary Figure S58** Widths of HPDIs or CIs against true value of  $\gamma$  for quantitative trait when  $(\sigma_0^2, \sigma_1^2, \sigma_2^2) = (4, 4.8, 4)$  with  $n = 500$ ,  $\text{MAF} = 0.3$  and  $\rho = -0.05$ . The red points represent the widths of the noninformative intervals or the empty sets, and the yellow point represents the width of the discontinuous interval. (a) BN method; (b) BU method; (c) PF method; (d) Fieller's method

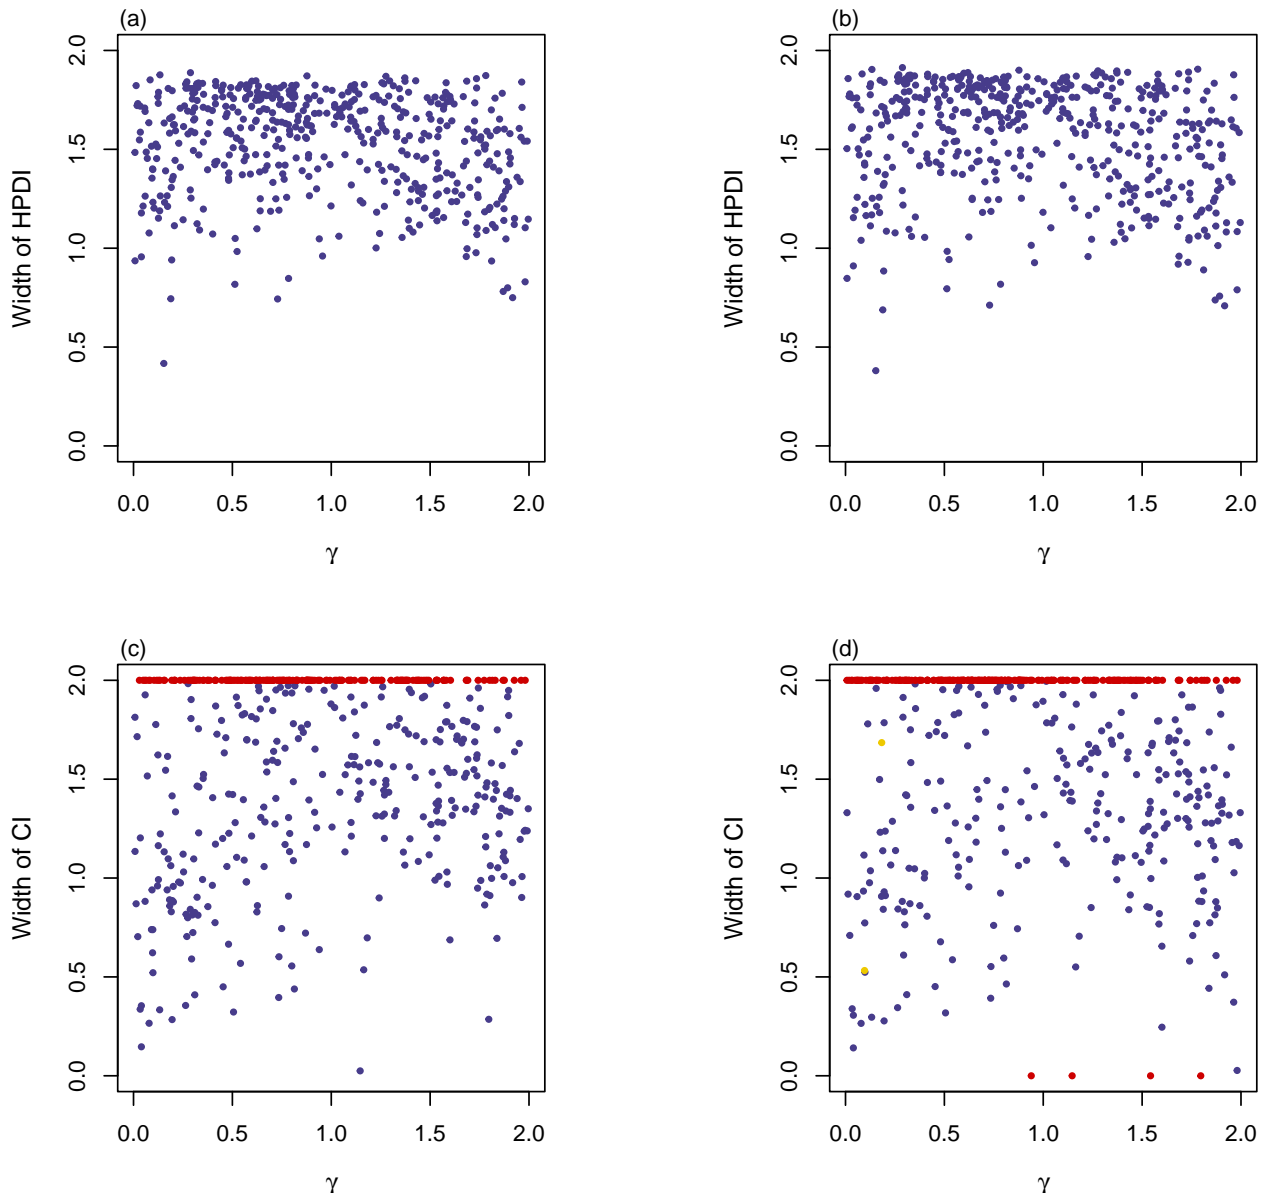

**Supplementary Figure S59** Widths of HPDIs or CIs against true value of  $\gamma$  for quantitative trait when  $(\sigma_0^2, \sigma_1^2, \sigma_2^2) = (4, 4.8, 4)$  with  $n = 500$ ,  $\text{MAF} = 0.3$  and  $\rho = 0.05$ . The red points represent the widths of the noninformative intervals or the empty sets, and the yellow points represent the widths of the discontinuous intervals. **(a)** BN method; **(b)** BU method; **(c)** PF method; **(d)** Fieller's method

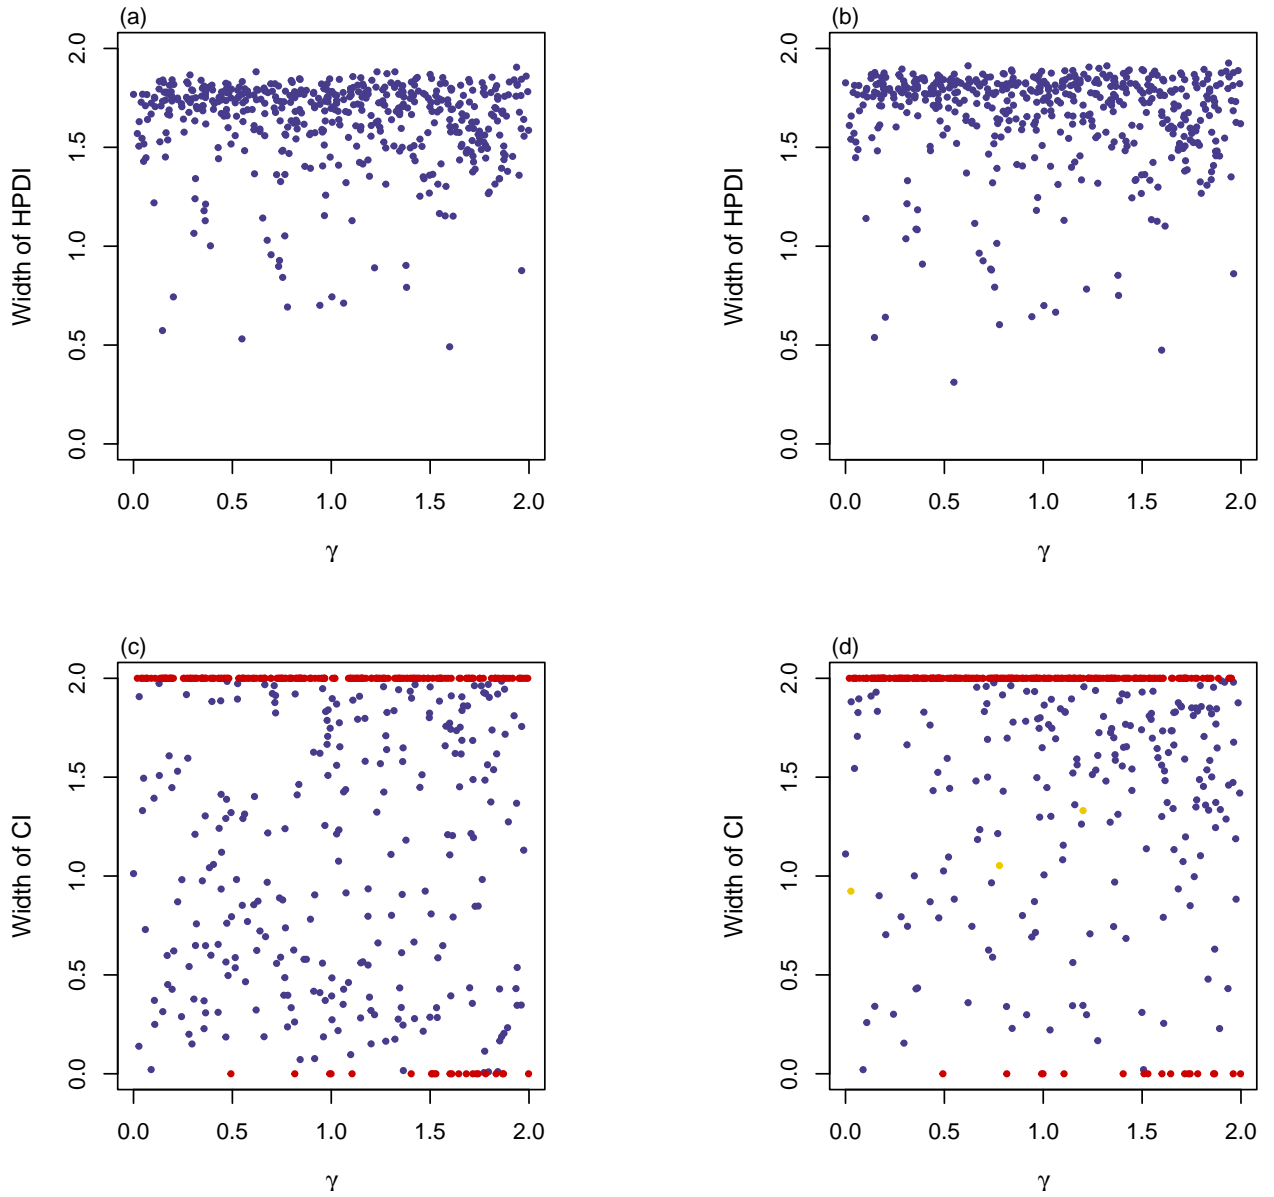

**Supplementary Figure S60** Widths of HPDIs or CIs against true value of  $\gamma$  for quantitative trait when  $(\sigma_0^2, \sigma_1^2, \sigma_2^2) = (4, 4.8, 4)$  with  $n = 500$ ,  $\text{MAF} = 0.1$  and  $\rho = 0$ . The red points represent the widths of the noninformative intervals or the empty sets, and the yellow points represent the widths of the discontinuous intervals. **(a)** BN method; **(b)** BU method; **(c)** PF method; **(d)** Fieller's method



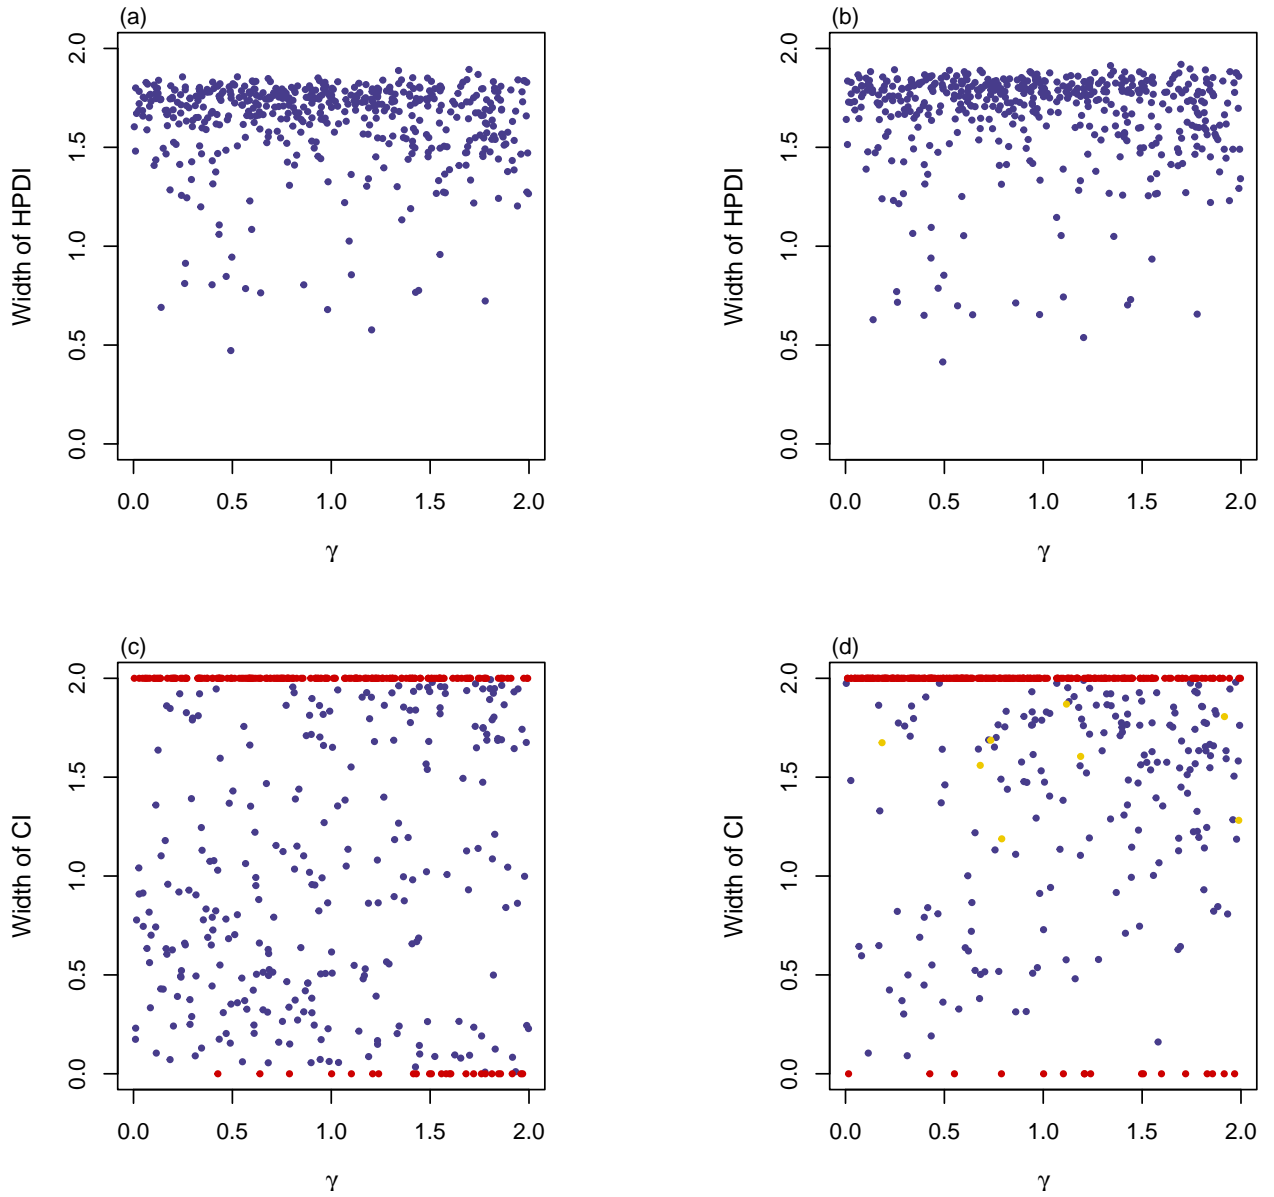

**Supplementary Figure S61** Widths of HPDIs or CIs against true value of  $\gamma$  for quantitative trait when  $(\sigma_0^2, \sigma_1^2, \sigma_2^2) = (4, 4.8, 4)$  with  $n = 500$ ,  $\text{MAF} = 0.1$  and  $\rho = -0.05$ . The red points represent the widths of the noninformative intervals or the empty sets, and the yellow points represent the widths of the discontinuous intervals. (a) BN method; (b) BU method; (c) PF method; (d) Fieller's method

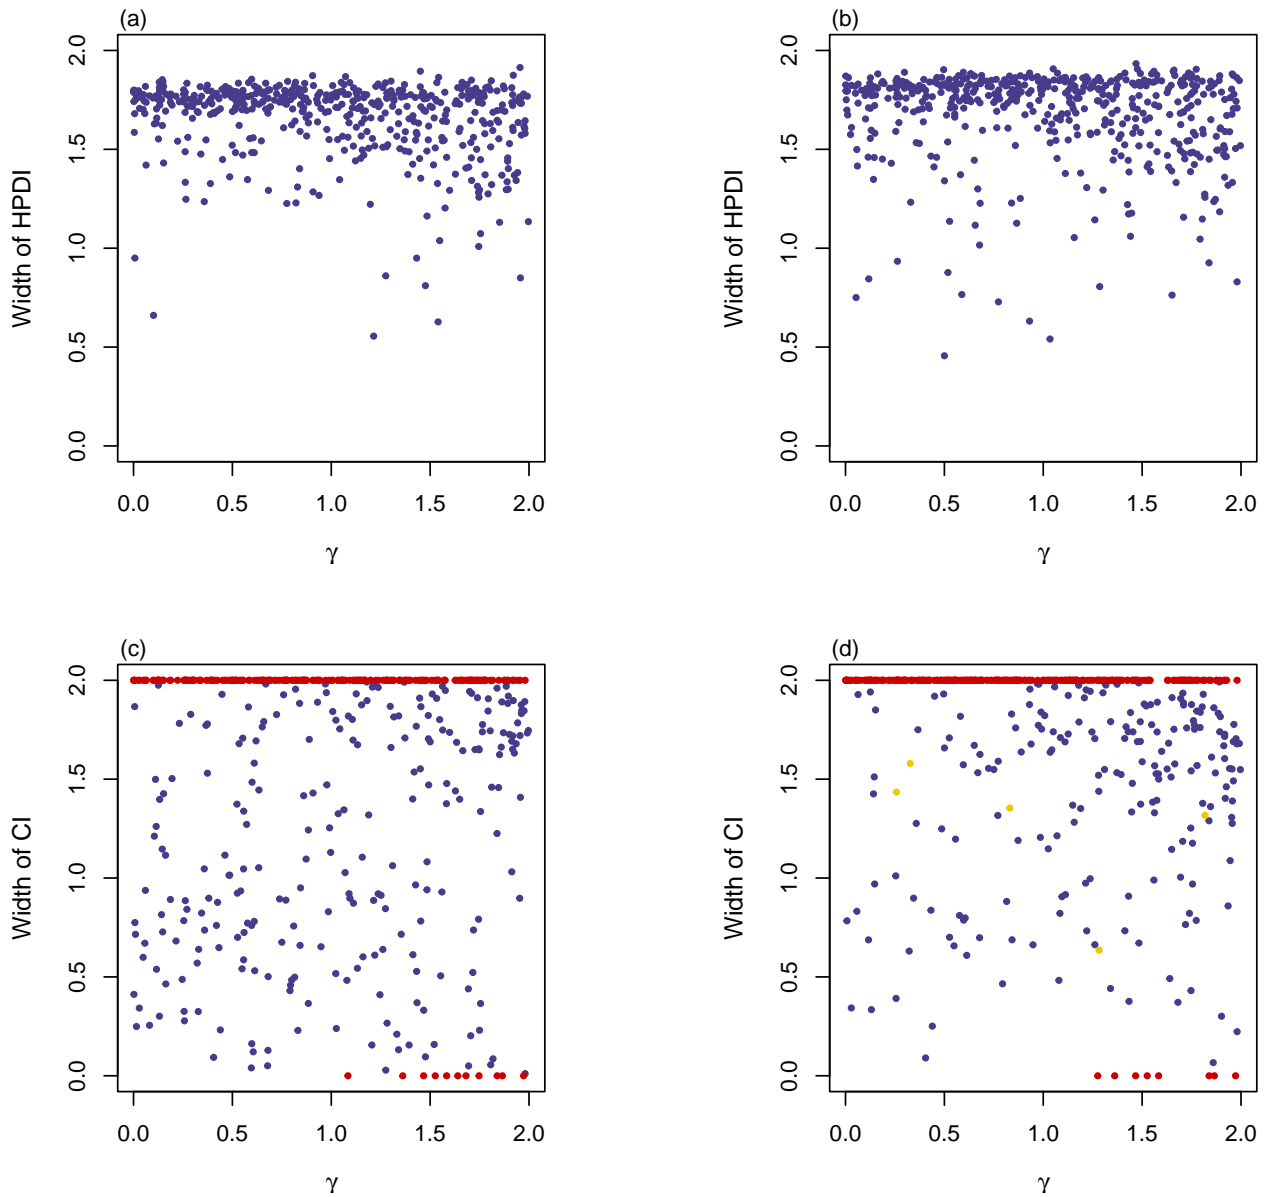

**Supplementary Figure S62** Widths of HPDIs or CIs against true value of  $\gamma$  for quantitative trait when  $(\sigma_0^2, \sigma_1^2, \sigma_2^2) = (4, 4.8, 4)$  with  $n = 500$ ,  $\text{MAF} = 0.1$  and  $\rho = 0.05$ . The red points represent the widths of the noninformative intervals or the empty sets, and the yellow points represent the widths of the discontinuous intervals. **(a)** BN method; **(b)** BU method; **(c)** PF method; **(d)** Fieller's method

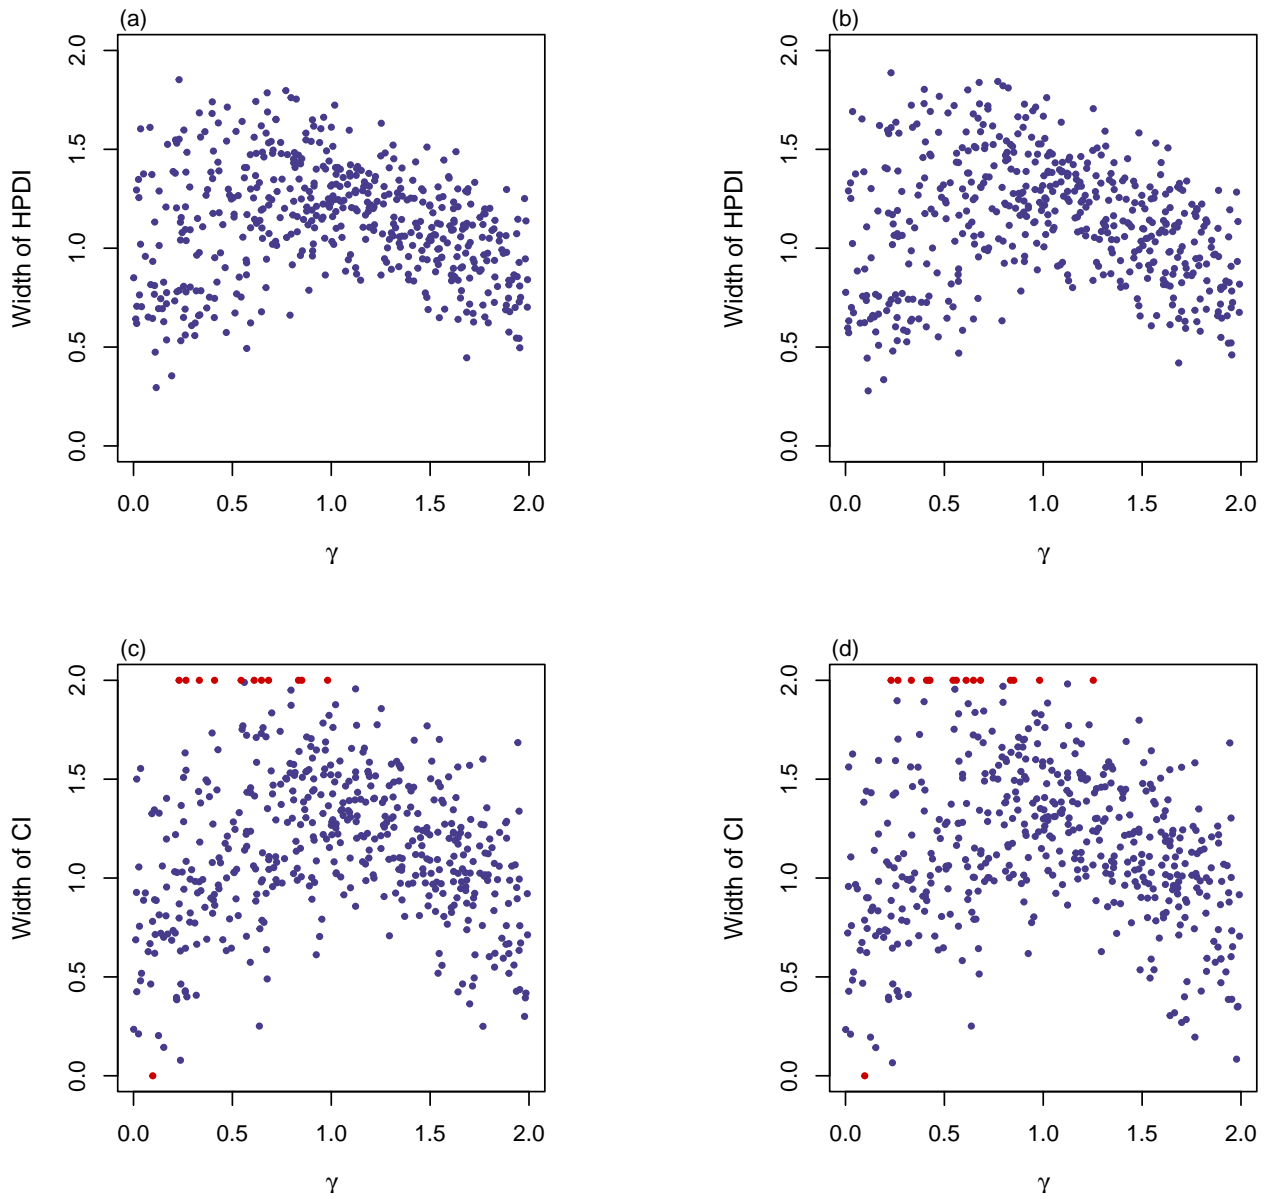

**Supplementary Figure S63** Widths of HPDIs or CIs against true value of  $\gamma$  for quantitative trait when  $(\sigma_0^2, \sigma_1^2, \sigma_2^2) = (4, 4.8, 4)$  with  $n = 2000$ ,  $\text{MAF} = 0.3$  and  $\rho = 0$ . The red points represent the widths of the noninformative intervals or the empty sets. **(a)** BN method; **(b)** BU method; **(c)** PF method; **(d)** Fieller's method

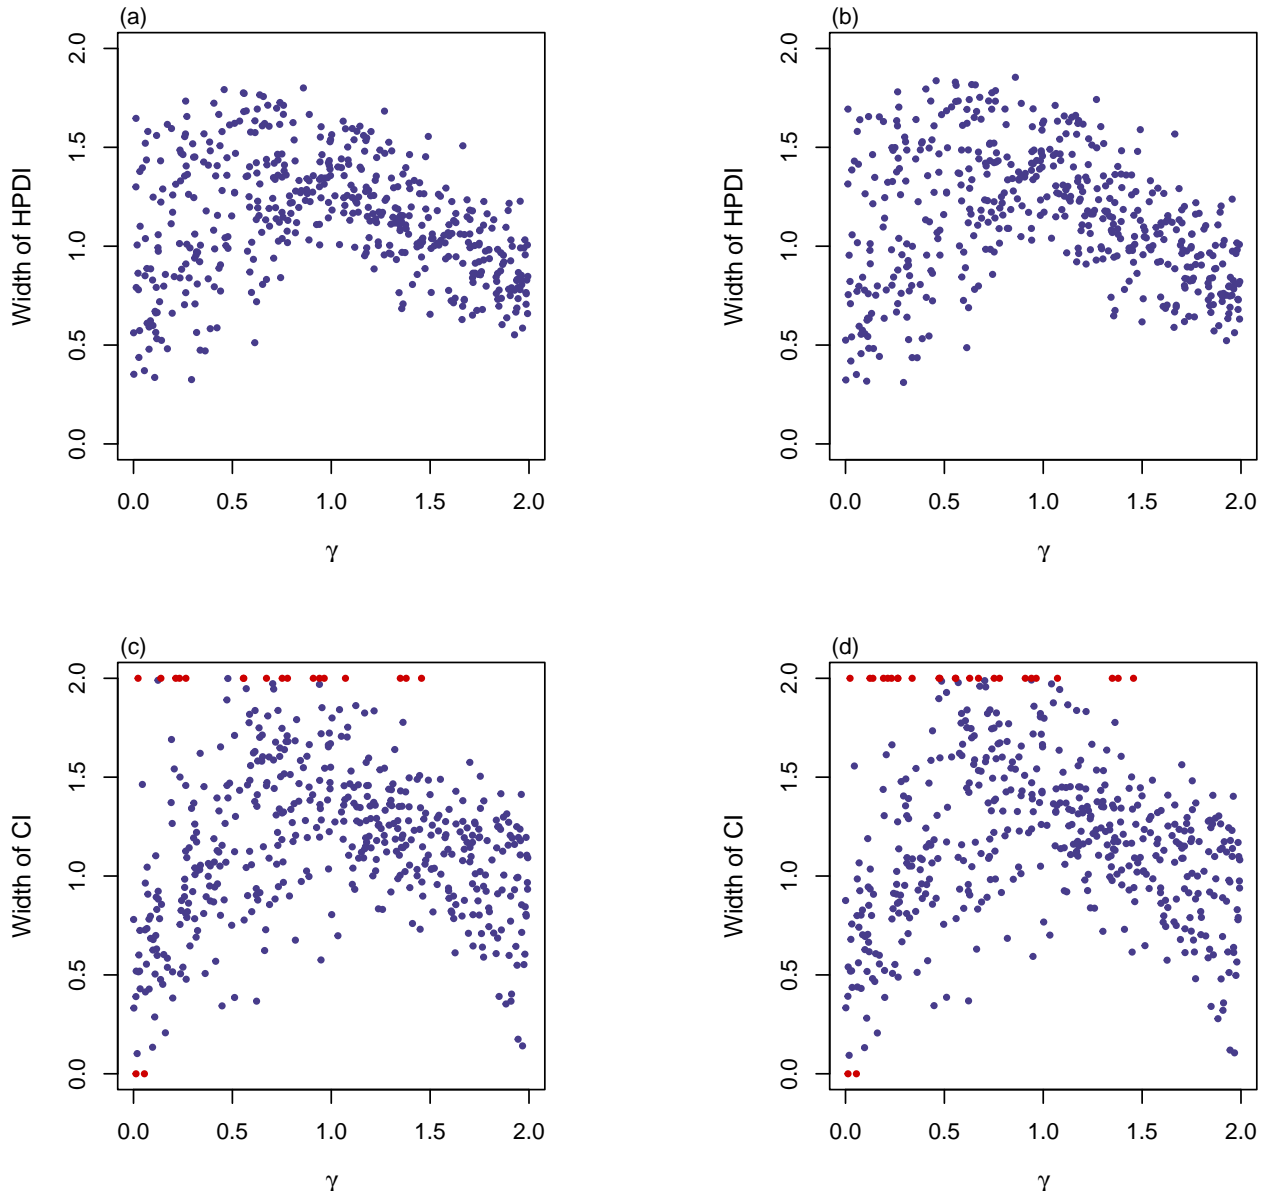

**Supplementary Figure S64** Widths of HPDIs or CIs against true value of  $\gamma$  for quantitative trait when  $(\sigma_0^2, \sigma_1^2, \sigma_2^2) = (4, 4.8, 4)$  with  $n = 2000$ ,  $\text{MAF} = 0.3$  and  $\rho = -0.05$ . The red points represent the widths of the noninformative intervals or the empty sets. **(a)** BN method; **(b)** BU method; **(c)** PF method; **(d)** Fieller's method

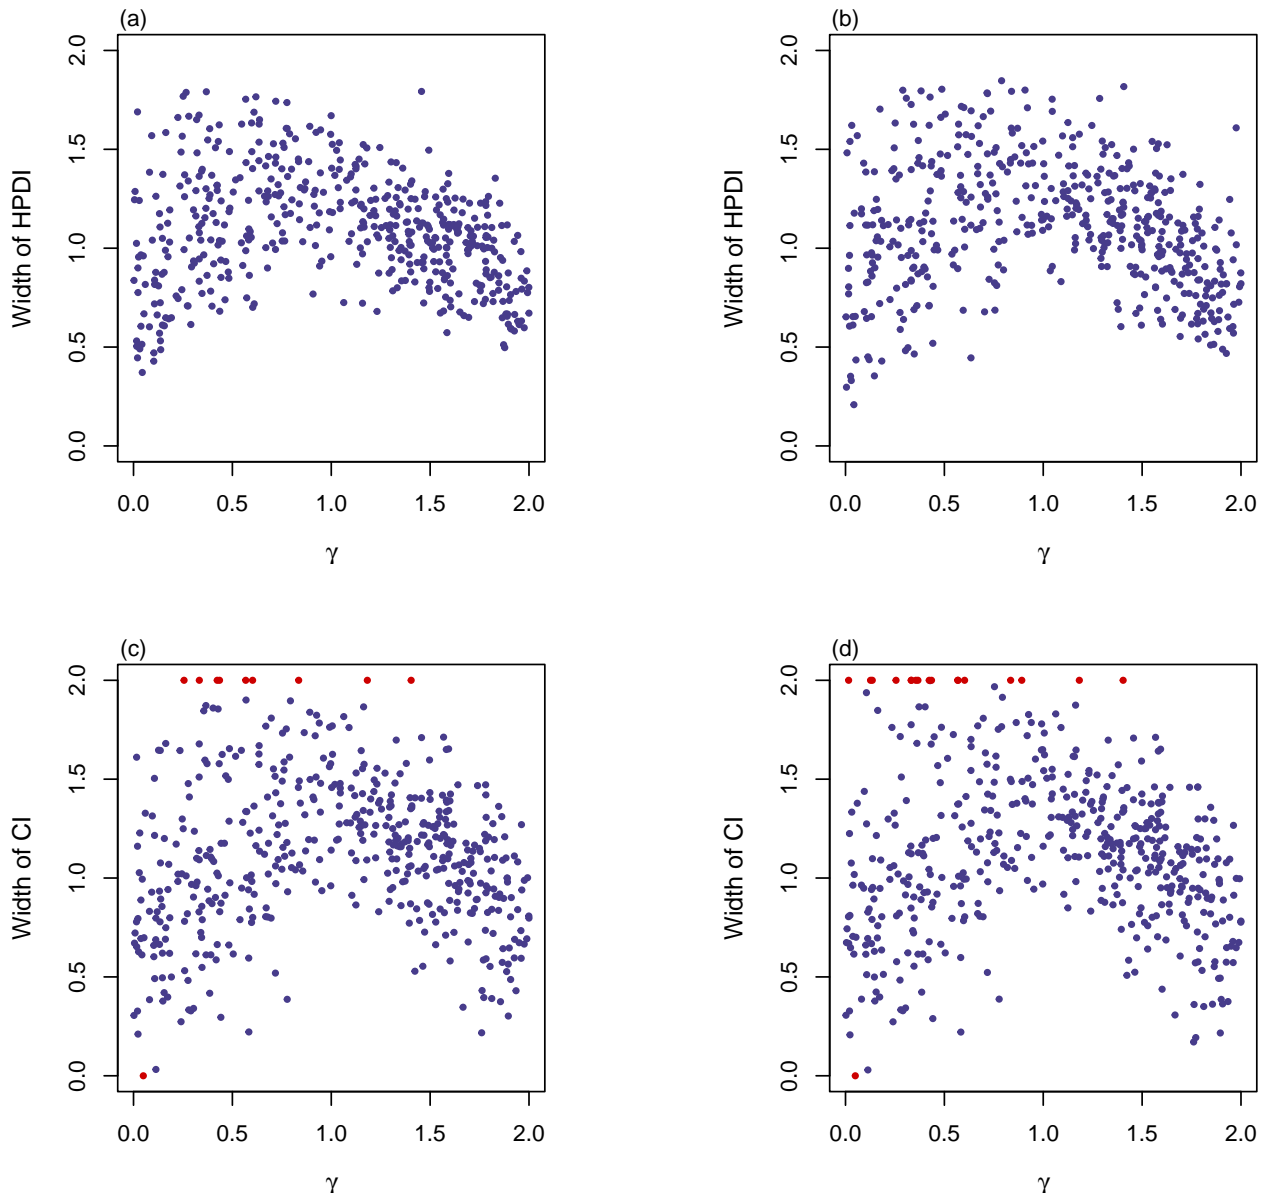

**Supplementary Figure S65** Widths of HPDIs or CIs against true value of  $\gamma$  for quantitative trait when  $(\sigma_0^2, \sigma_1^2, \sigma_2^2) = (4, 4.8, 4)$  with  $n = 2000$ ,  $\text{MAF} = 0.3$  and  $\rho = 0.05$ . The red points represent the widths of the noninformative intervals or the empty sets. **(a)** BN method; **(b)** BU method; **(c)** PF method; **(d)** Fieller's method

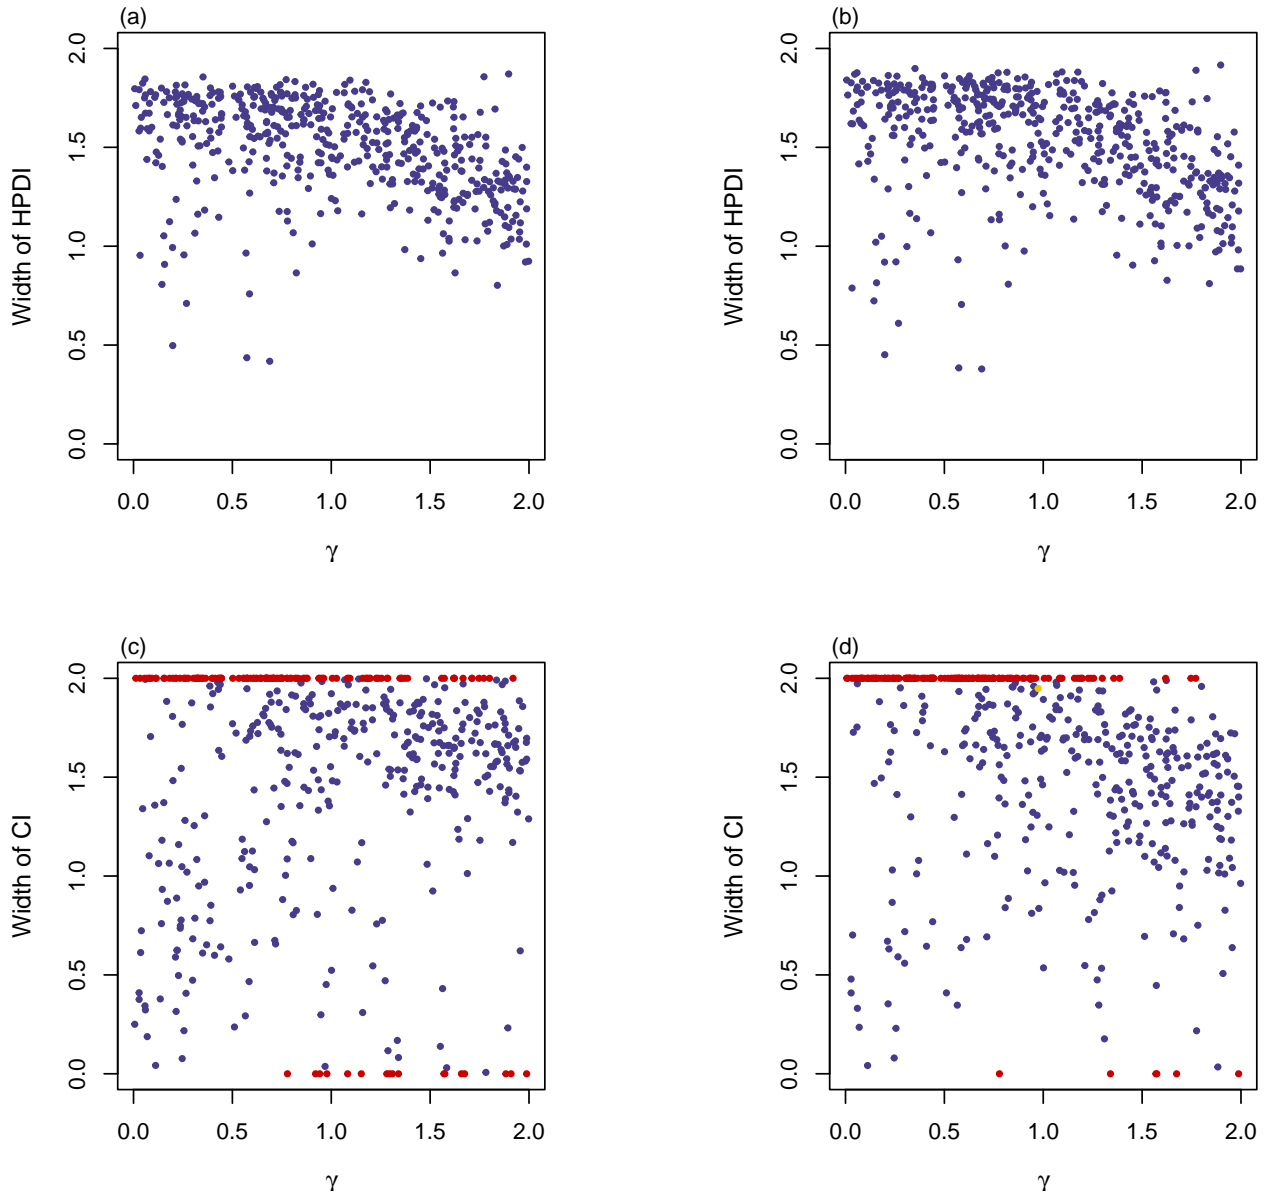

**Supplementary Figure S66** Widths of HPDIs or CIs against true value of  $\gamma$  for quantitative trait when  $(\sigma_0^2, \sigma_1^2, \sigma_2^2) = (4, 4.8, 4)$  with  $n = 2000$ ,  $\text{MAF} = 0.1$  and  $\rho = 0$ . The red points represent the widths of the noninformative intervals or the empty sets, and the yellow point represents the width of the discontinuous interval.  
 (a) BN method; (b) BU method; (c) PF method; (d) Fieller's method

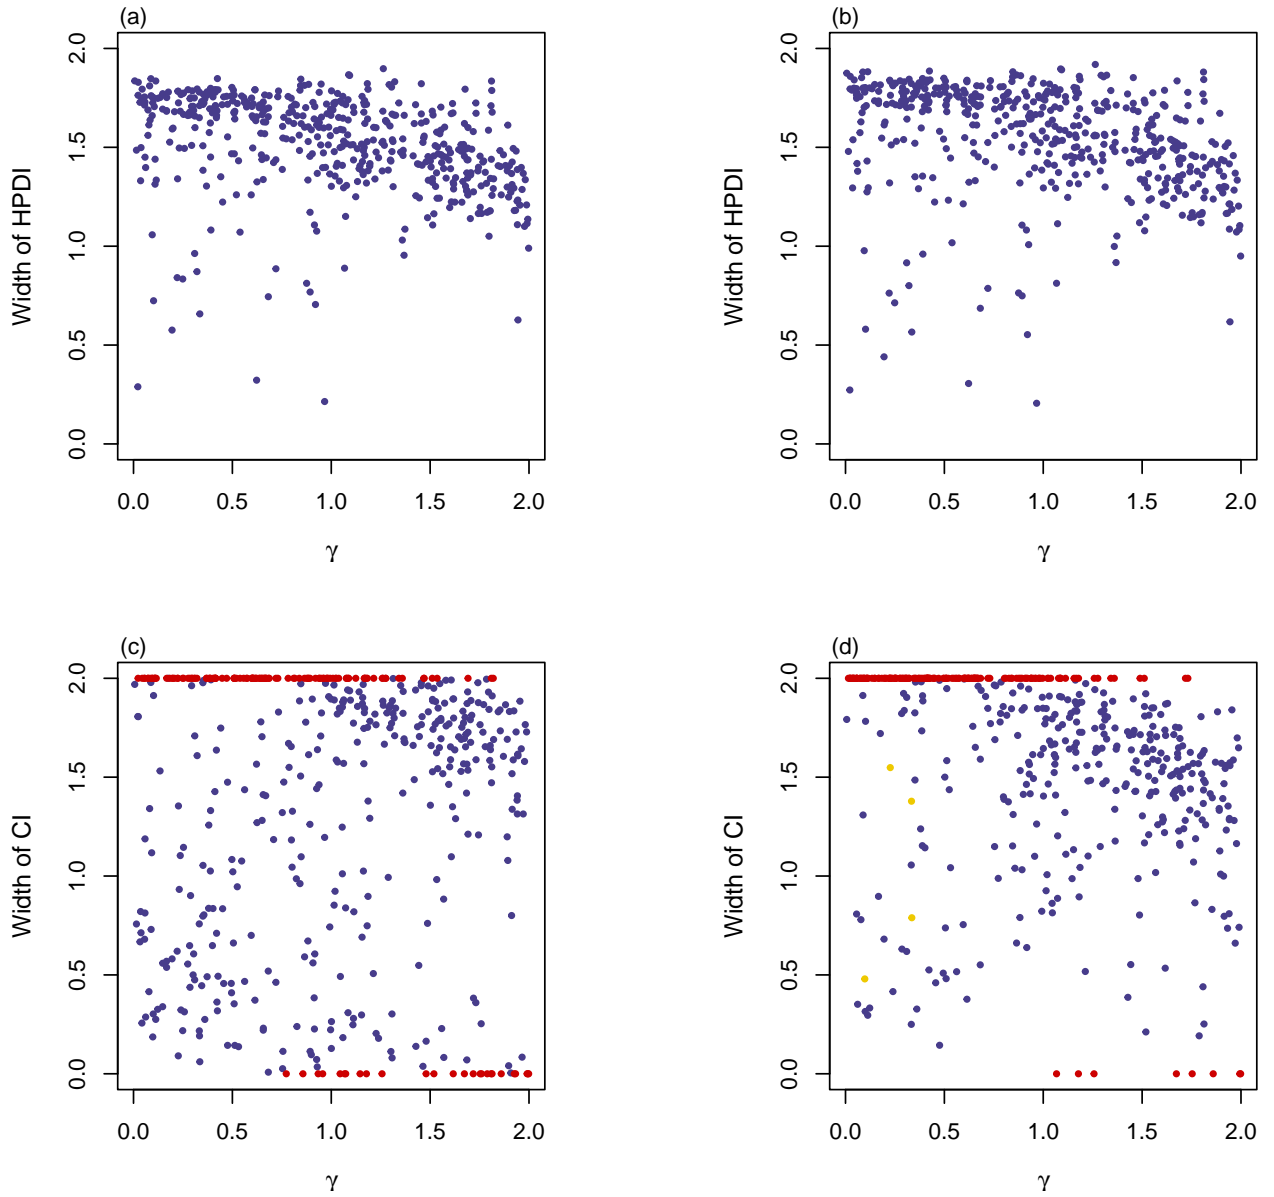

**Supplementary Figure S67** Widths of HPDIs or CIs against true value of  $\gamma$  for quantitative trait when  $(\sigma_0^2, \sigma_1^2, \sigma_2^2) = (4, 4.8, 4)$  with  $n = 2000$ ,  $\text{MAF} = 0.1$  and  $\rho = -0.05$ . The red points represent the widths of the noninformative intervals or the empty sets, and the yellow points represent the widths of the discontinuous intervals. (a) BN method; (b) BU method; (c) PF method; (d) Fieller's method

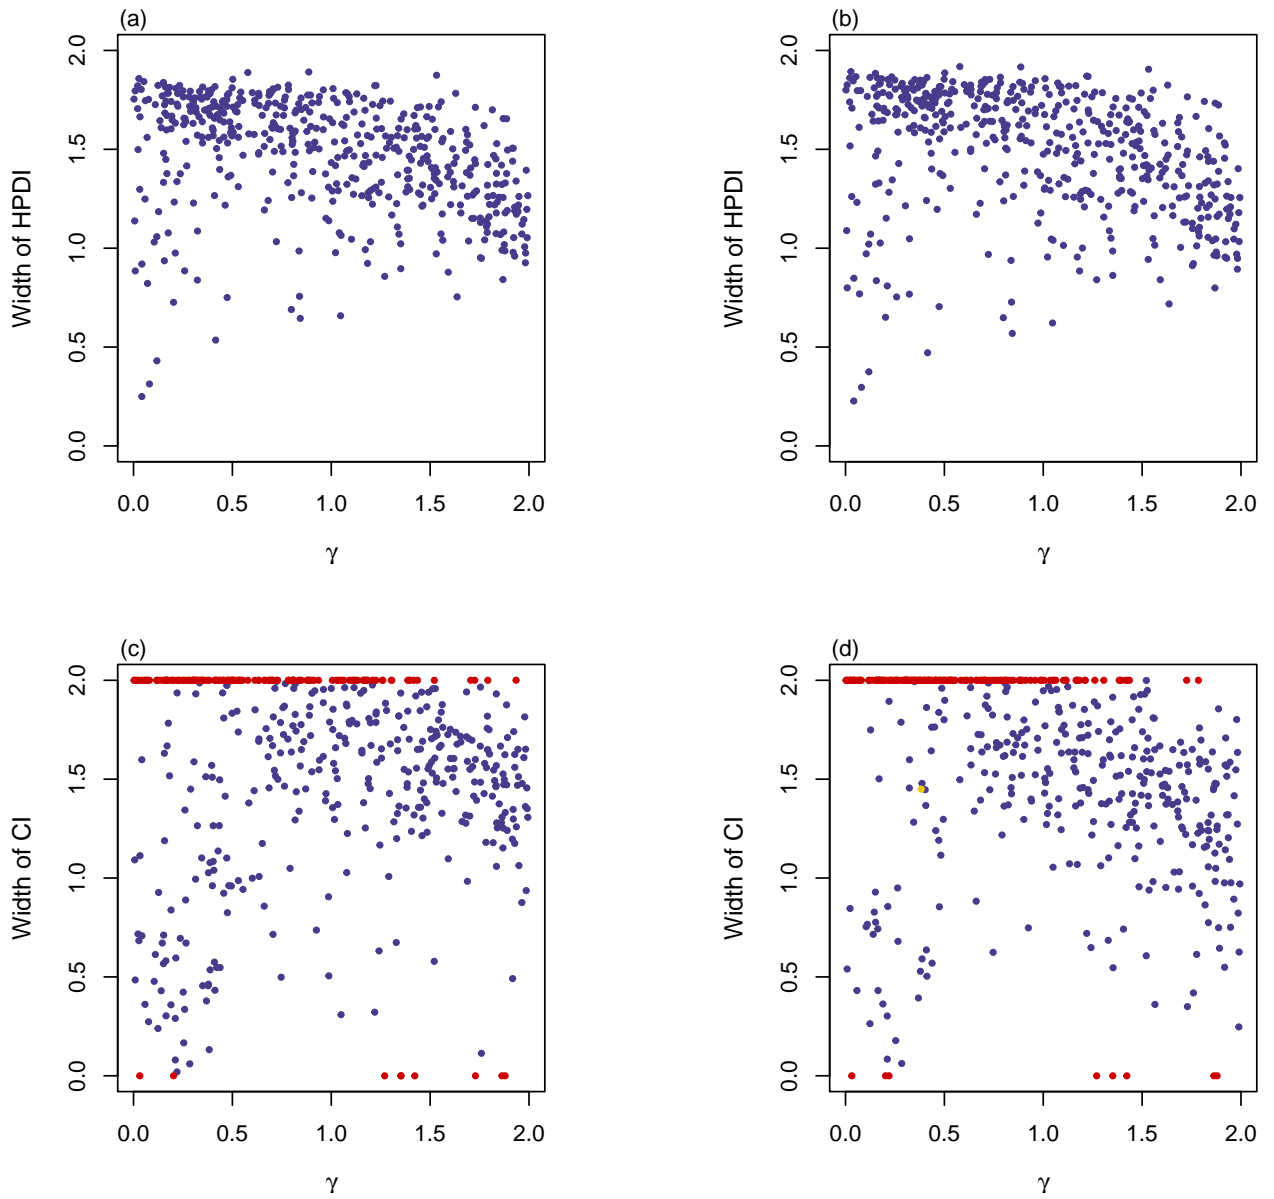

**Supplementary Figure S68** Widths of HPDIs or CIs against true value of  $\gamma$  for quantitative trait when  $(\sigma_0^2, \sigma_1^2, \sigma_2^2) = (4, 4.8, 4)$  with  $n = 2000$ ,  $\text{MAF} = 0.1$  and  $\rho = 0.05$ . The red points represent the widths of the noninformative intervals or the empty sets, and the yellow point represents the width of the discontinuous interval.  
**(a)** BN method; **(b)** BU method; **(c)** PF method; **(d)** Fieller's method



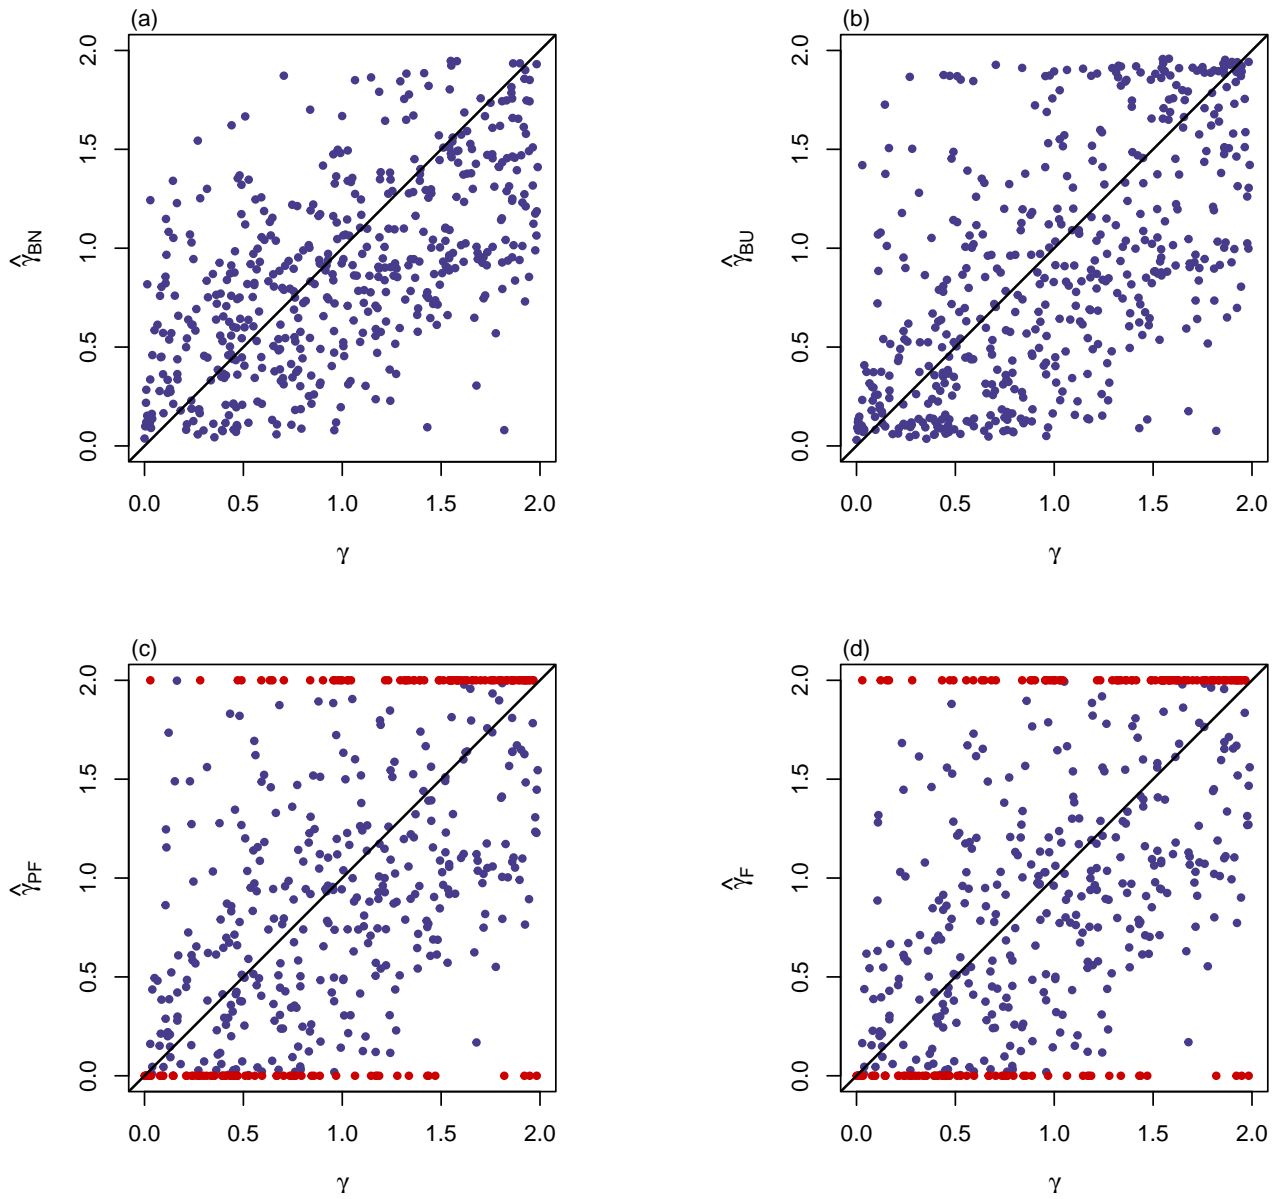

**Supplementary Figure S69** Scatter plots of point estimates of  $\gamma$  for qualitative trait with a covariate when  $n = 500$ ,  $MAF = 0.3$  and  $\rho = 0$ . The results are against true value of  $\gamma$ . The red points represent the extreme values (0 or 2). (a)  $\hat{\gamma}_{BN}$ ; (b)  $\hat{\gamma}_{BU}$ ; (c)  $\hat{\gamma}_{PF}$ ; (d)  $\hat{\gamma}_F$

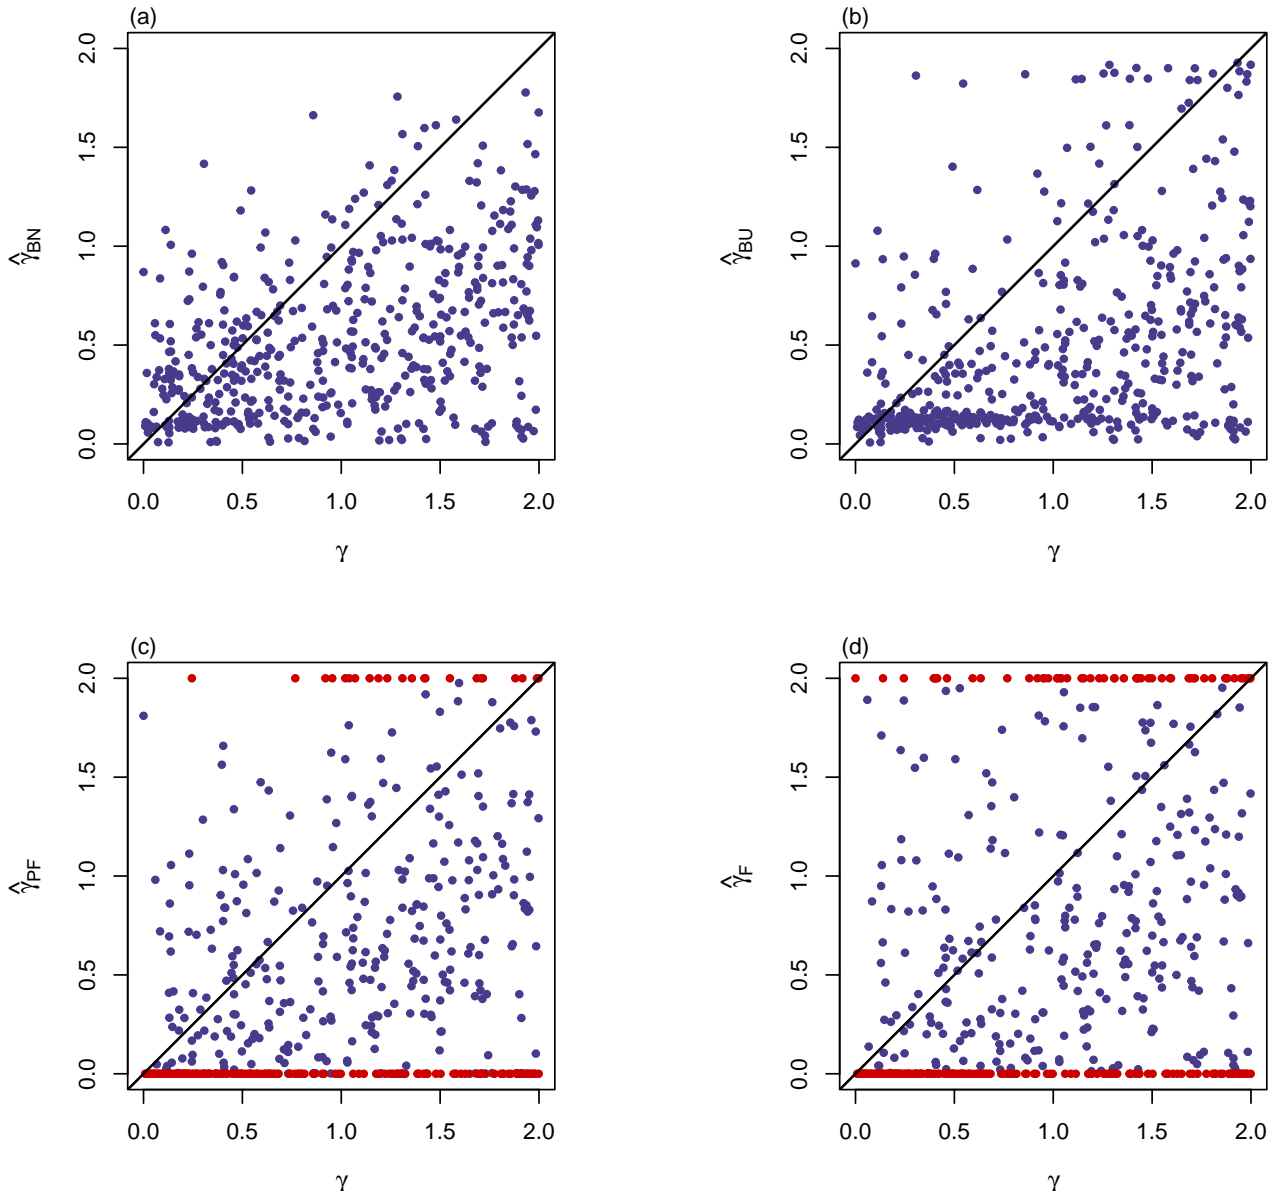

**Supplementary Figure S70** Scatter plots of point estimates of  $\gamma$  for qualitative trait with a covariate when  $n = 500$ ,  $MAF = 0.1$  and  $\rho = 0$ . The results are against true value of  $\gamma$ . The red points represent the extreme values (0 or 2). **(a)**  $\hat{\gamma}_{BN}$ ; **(b)**  $\hat{\gamma}_{BU}$ ; **(c)**  $\hat{\gamma}_{PF}$ ; **(d)**  $\hat{\gamma}_F$

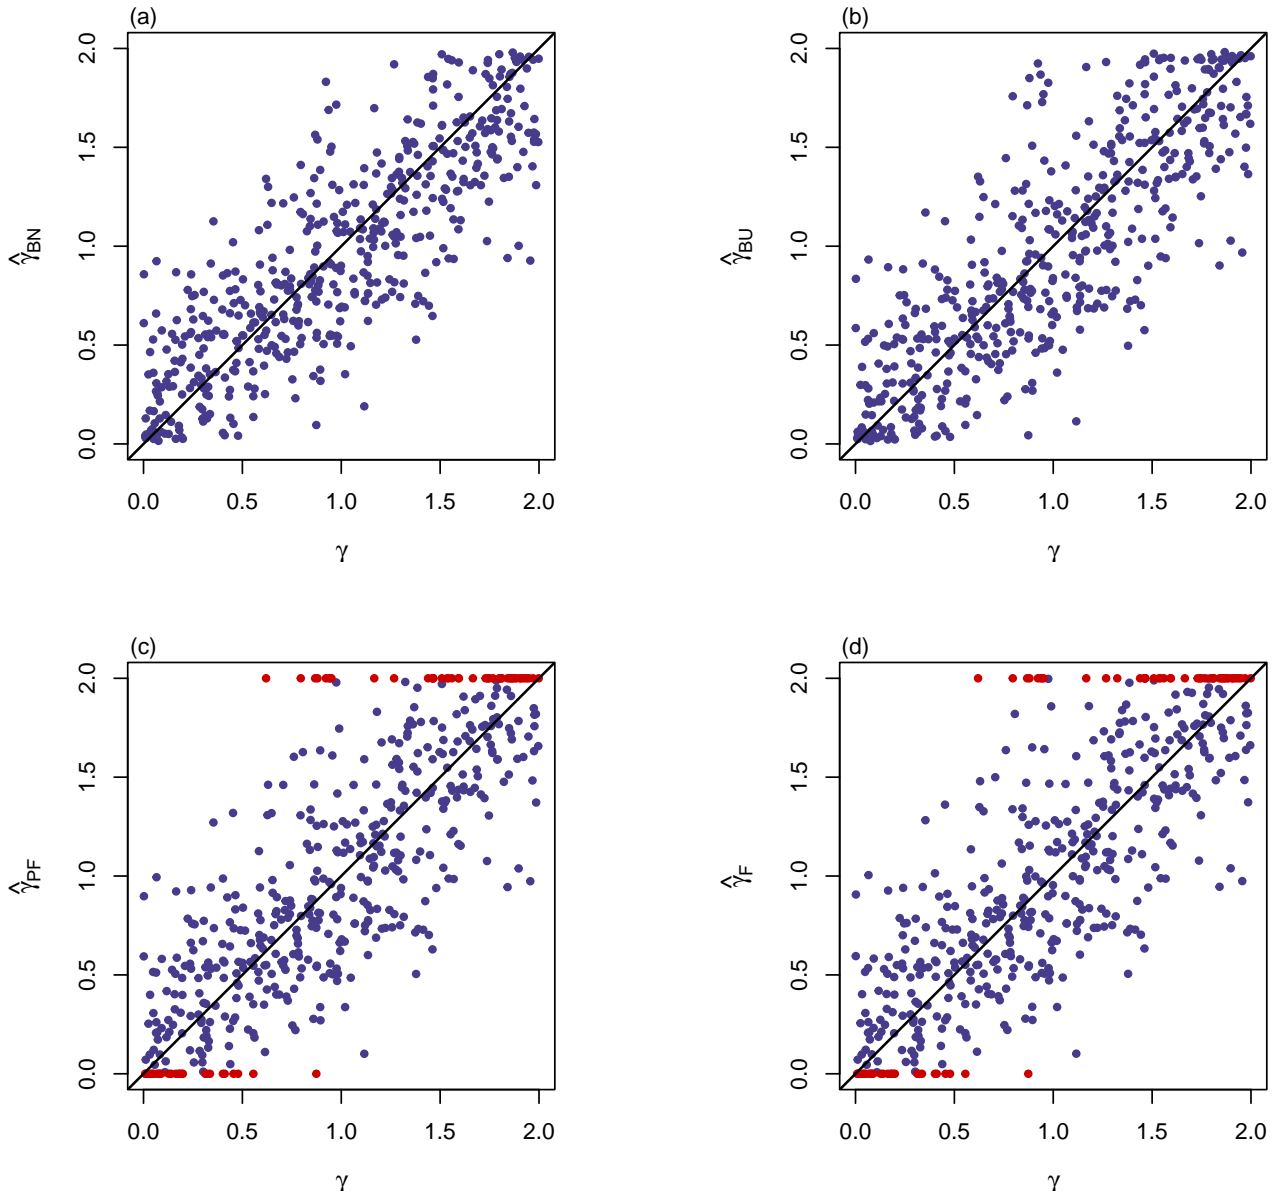

**Supplementary Figure S71** Scatter plots of point estimates of  $\gamma$  for qualitative trait with a covariate when  $n = 2000$ ,  $MAF = 0.3$  and  $\rho = 0$ . The results are against true value of  $\gamma$ . The red points represent the extreme values (0 or 2). **(a)**  $\hat{\gamma}_{BN}$ ; **(b)**  $\hat{\gamma}_{BU}$ ; **(c)**  $\hat{\gamma}_{PF}$ ; **(d)**  $\hat{\gamma}_F$

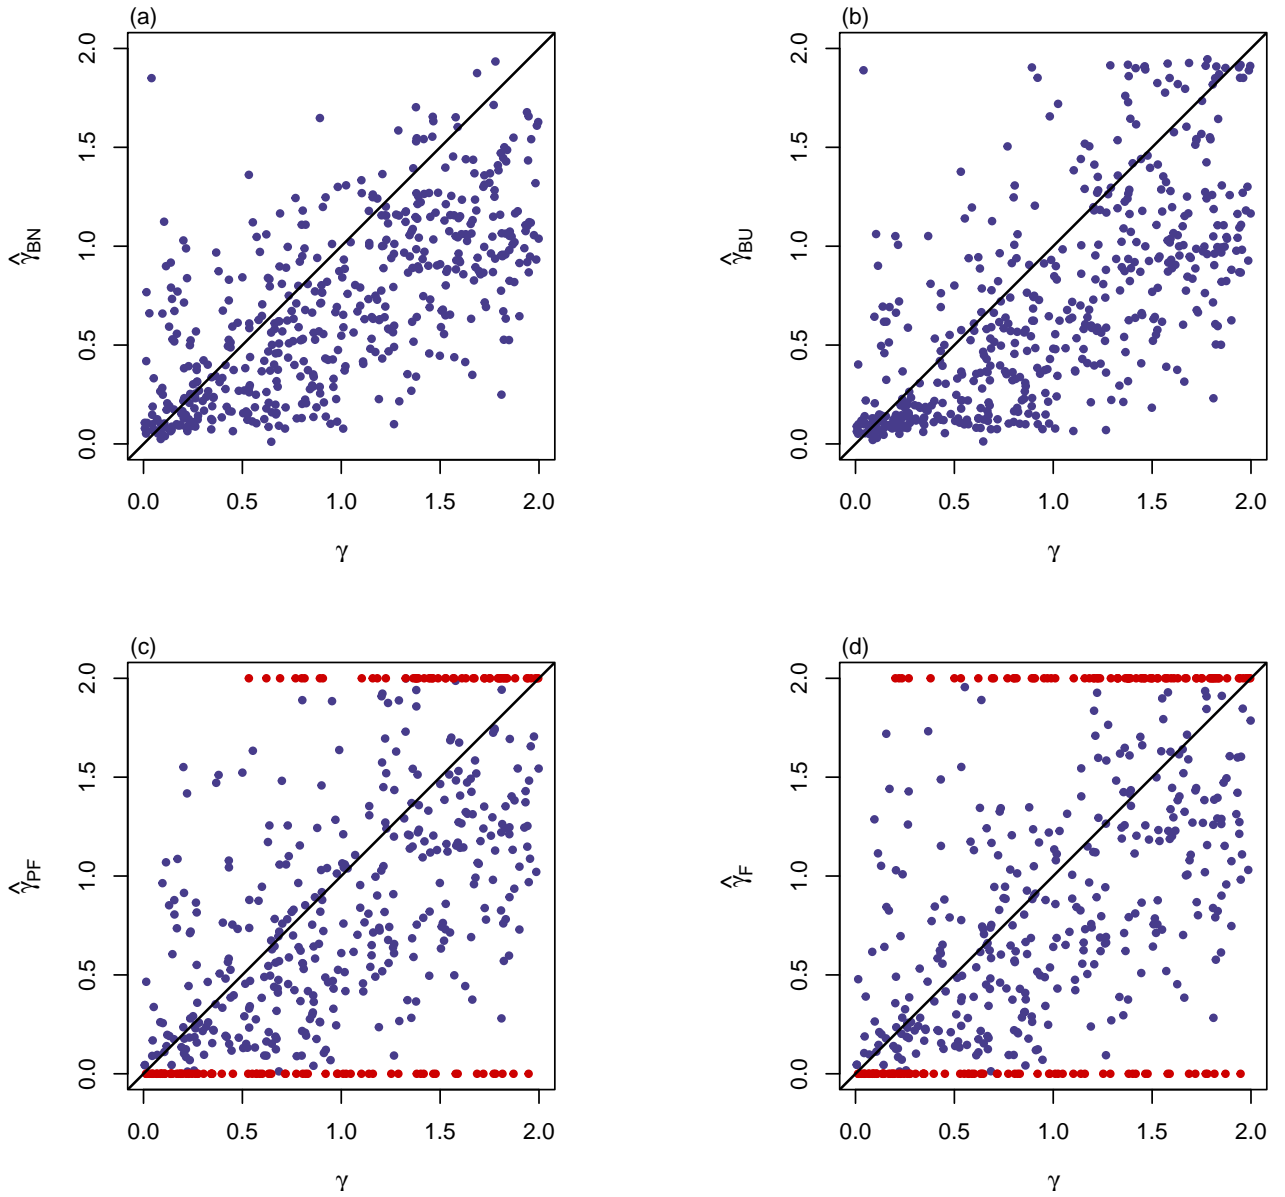

**Supplementary Figure S72** Scatter plots of point estimates of  $\gamma$  for qualitative trait with a covariate when  $n = 2000$ ,  $\text{MAF} = 0.1$  and  $\rho = 0$ . The results are against true value of  $\gamma$ . The red points represent the extreme values (0 or 2). (a)  $\hat{\gamma}_{BN}$ ; (b)  $\hat{\gamma}_{BU}$ ; (c)  $\hat{\gamma}_{PF}$ ; (d)  $\hat{\gamma}_F$

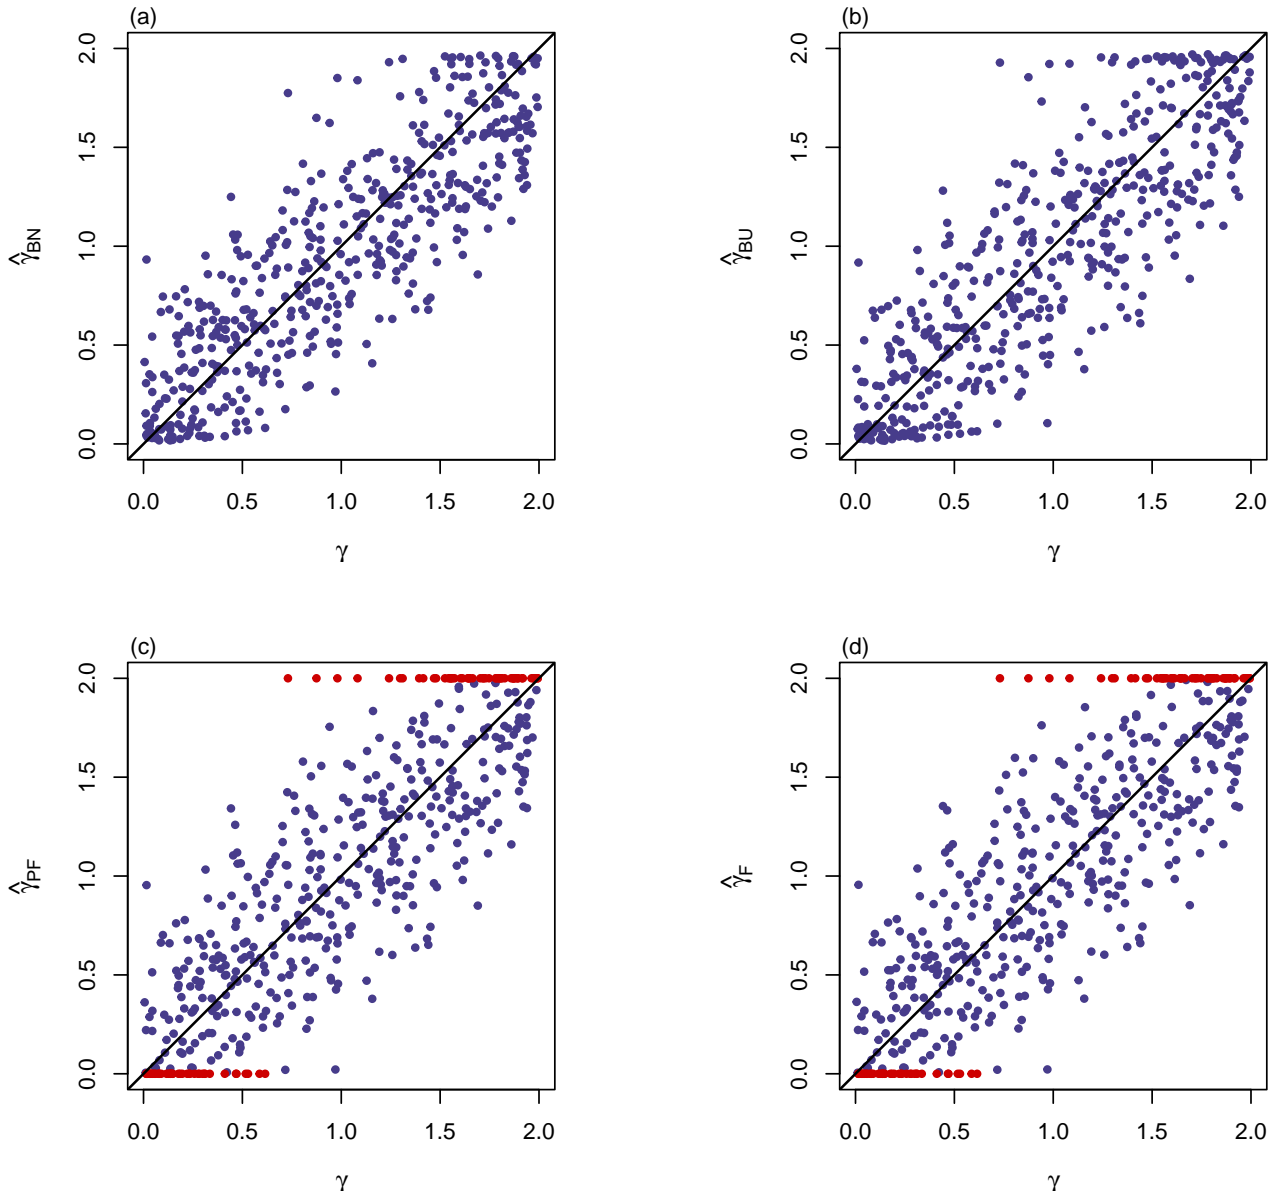

**Supplementary Figure S73** Scatter plots of point estimates of  $\gamma$  for quantitative trait with a covariate when  $n = 500$ ,  $\text{MAF} = 0.3$  and  $\rho = 0$ . The results are against true value of  $\gamma$  with  $(\sigma_0^2, \sigma_1^2, \sigma_2^2) = (1, 1.2, 1)$ . The red points represent the extreme values (0 or 2). **(a)**  $\hat{\gamma}_{BN}$ ; **(b)**  $\hat{\gamma}_{BU}$ ; **(c)**  $\hat{\gamma}_{PF}$ ; **(d)**  $\hat{\gamma}_F$

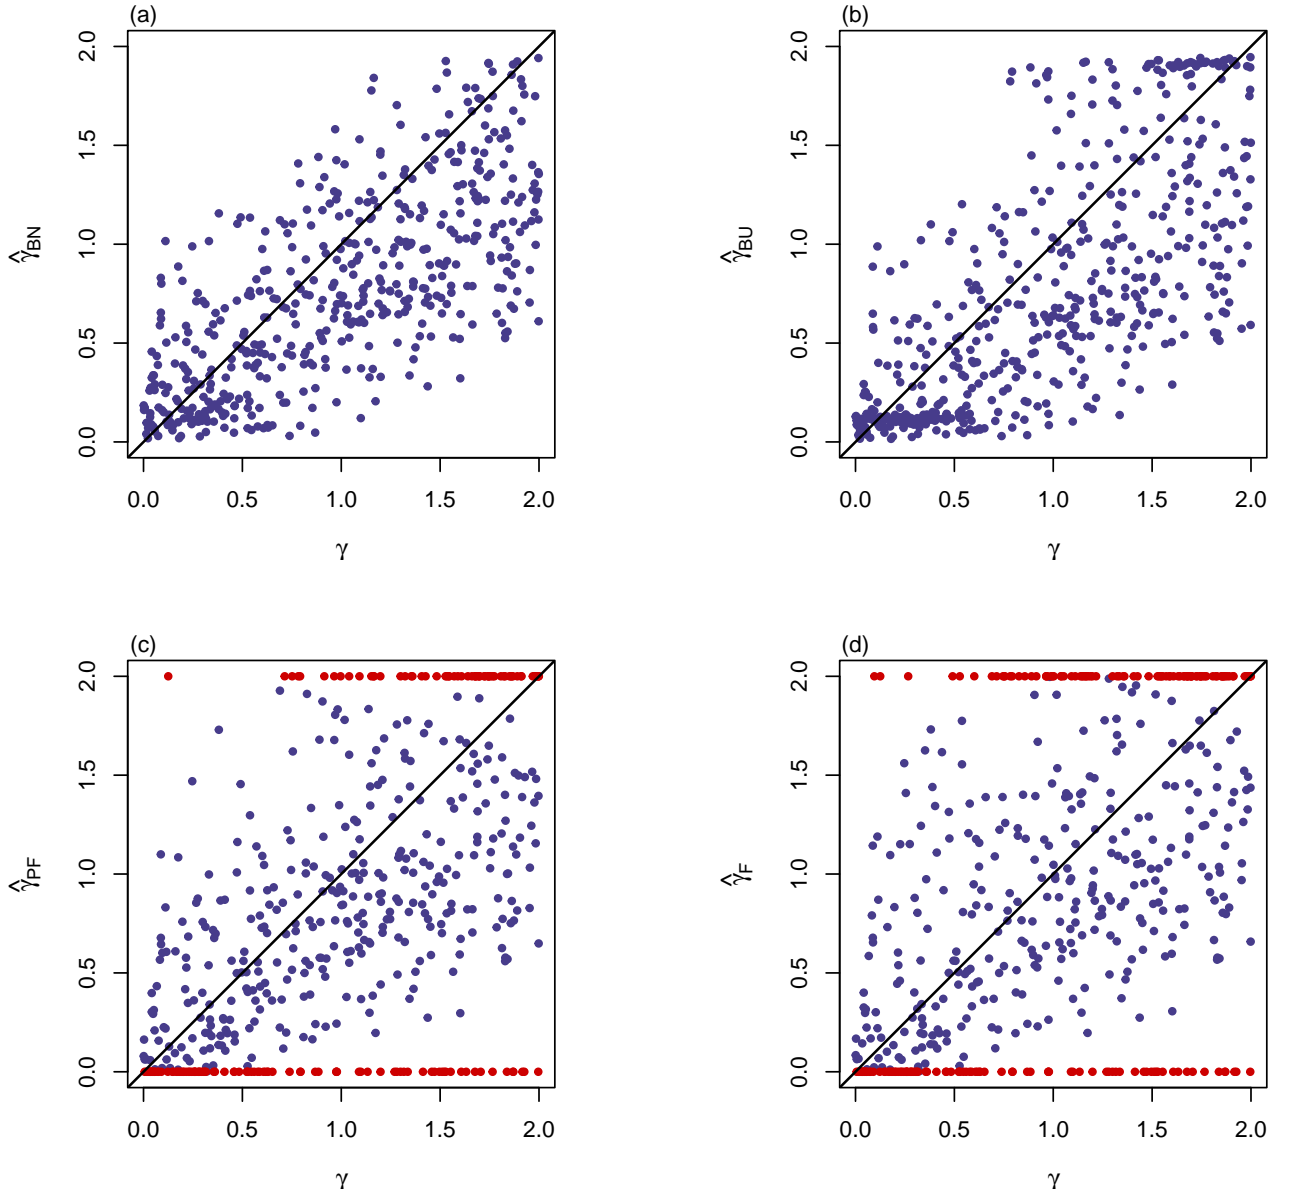

**Supplementary Figure S74** Scatter plots of point estimates of  $\gamma$  for quantitative trait with a covariate when  $n = 500$ ,  $\text{MAF} = 0.1$  and  $\rho = 0$ . The results are against true value of  $\gamma$  with  $(\sigma_0^2, \sigma_1^2, \sigma_2^2) = (1, 1.2, 1)$ . The red points represent the extreme values (0 or 2). **(a)**  $\hat{\gamma}_{BN}$ ; **(b)**  $\hat{\gamma}_{BU}$ ; **(c)**  $\hat{\gamma}_{PF}$ ; **(d)**  $\hat{\gamma}_F$

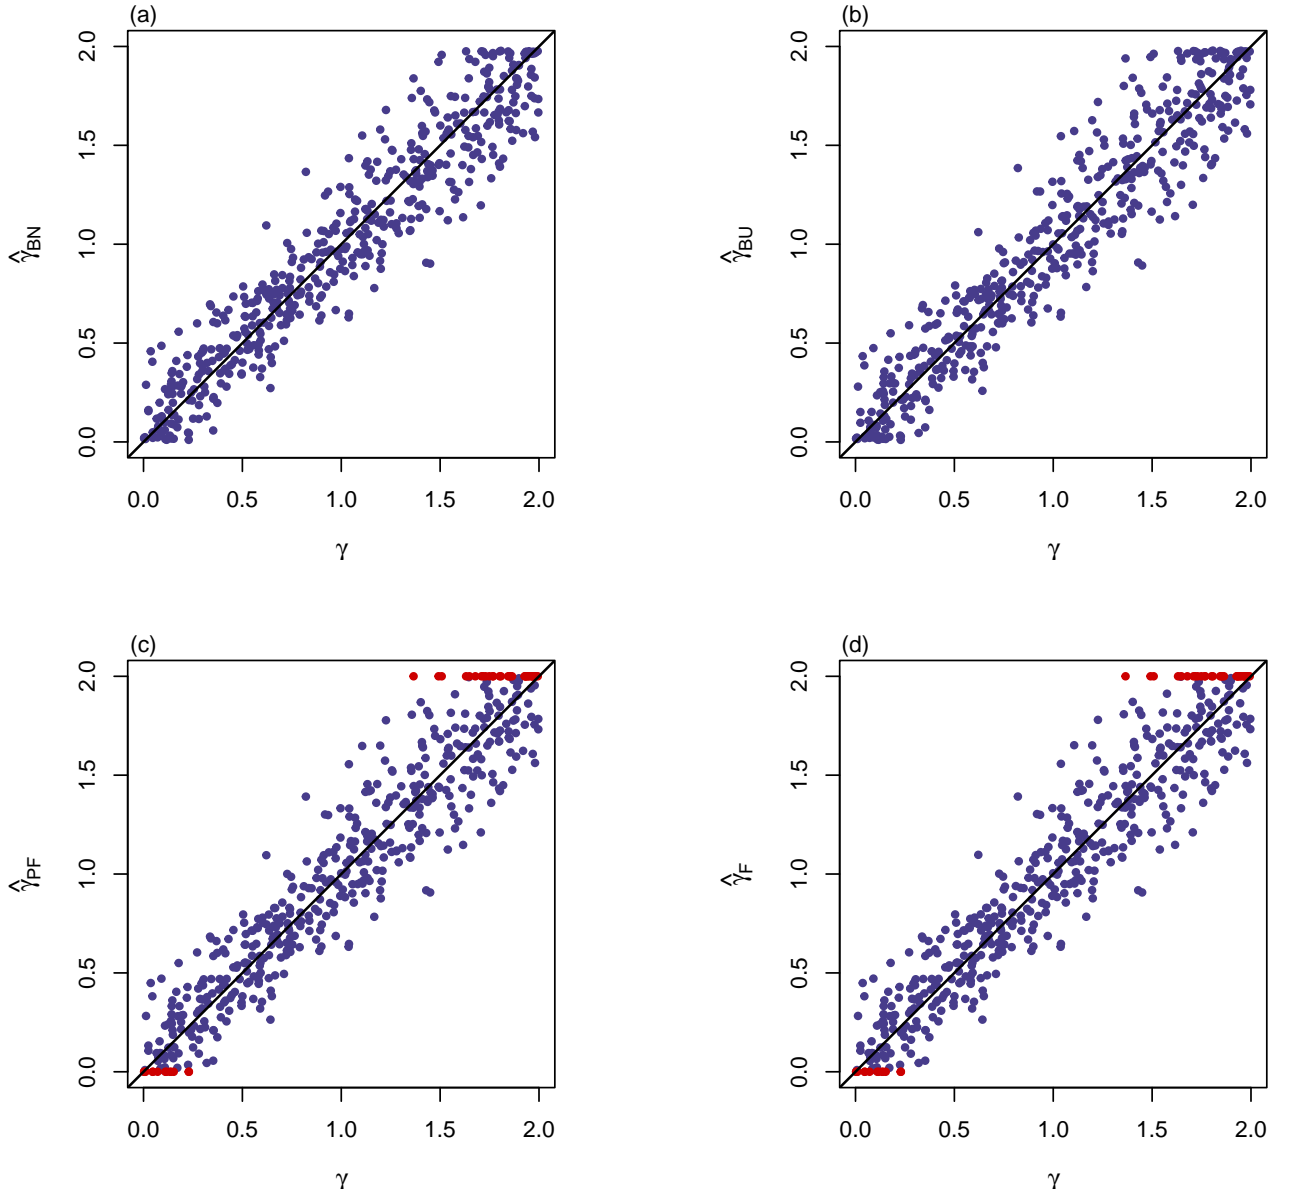

**Supplementary Figure S75** Scatter plots of point estimates of  $\gamma$  for quantitative trait with a covariate when  $n = 2000$ ,  $\text{MAF} = 0.3$  and  $\rho = 0$ . The results are against true value of  $\gamma$  with  $(\sigma_0^2, \sigma_1^2, \sigma_2^2) = (1, 1.2, 1)$ . The red points represent the extreme values (0 or 2). (a)  $\hat{\gamma}_{BN}$ ; (b)  $\hat{\gamma}_{BU}$ ; (c)  $\hat{\gamma}_{PF}$ ; (d)  $\hat{\gamma}_F$

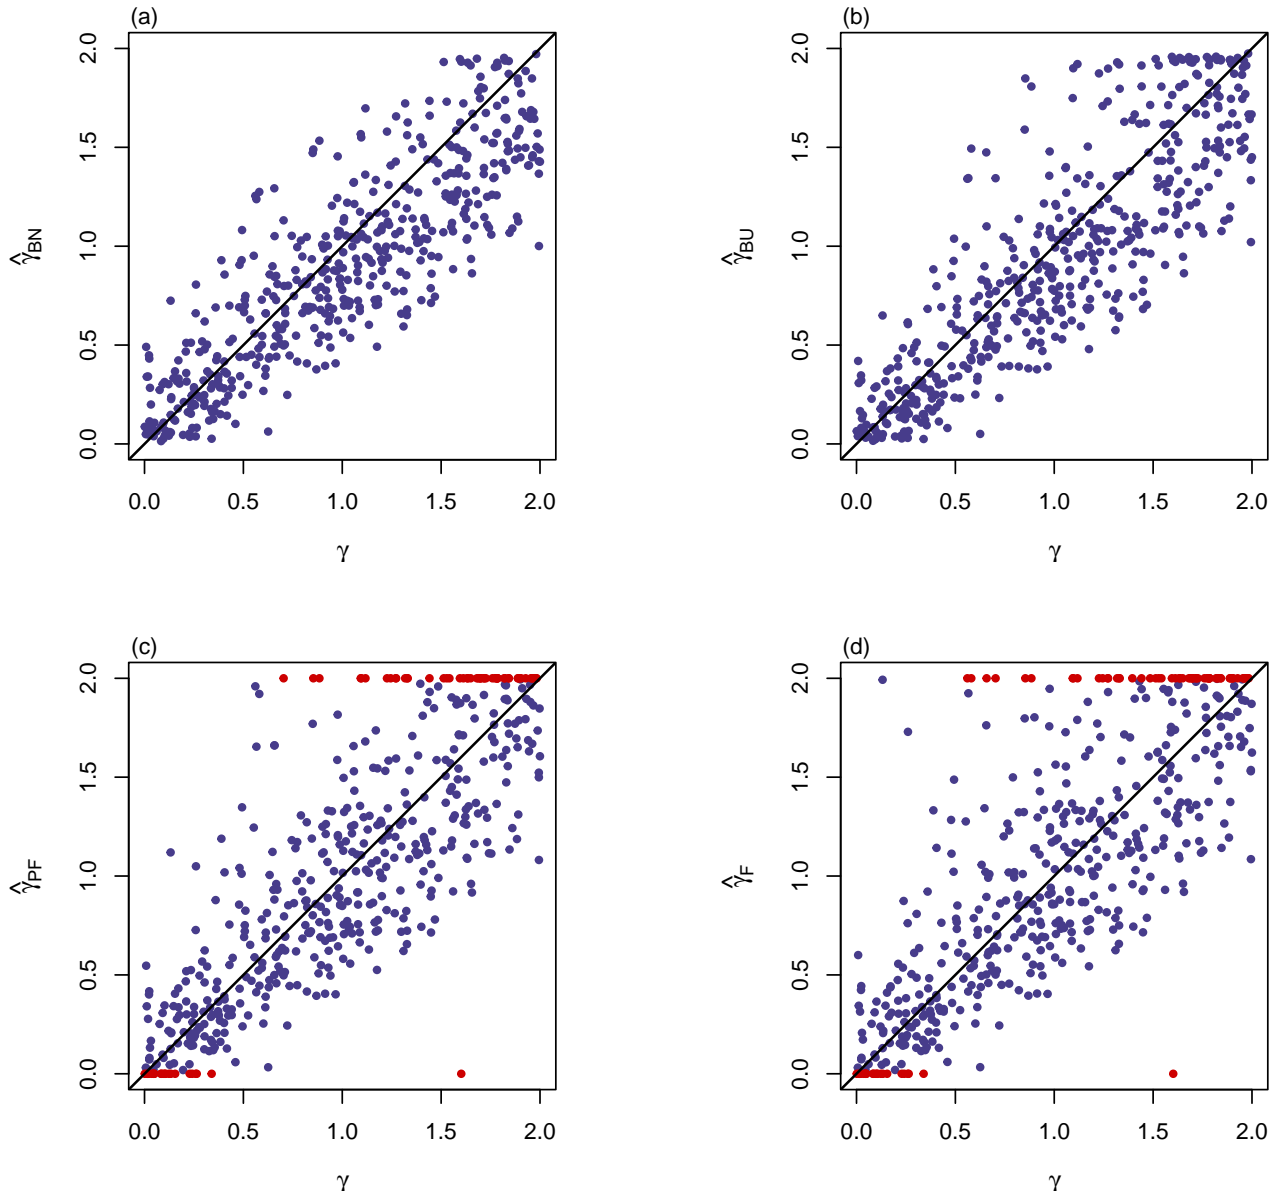

**Supplementary Figure S76** Scatter plots of point estimates of  $\gamma$  for quantitative trait with a covariate when  $n = 2000$ ,  $\text{MAF} = 0.1$  and  $\rho = 0$ . The results are against true value of  $\gamma$  with  $(\sigma_0^2, \sigma_1^2, \sigma_2^2) = (1, 1.2, 1)$ . The red points represent the extreme values (0 or 2). **(a)**  $\hat{\gamma}_{BN}$ ; **(b)**  $\hat{\gamma}_{BU}$ ; **(c)**  $\hat{\gamma}_{PF}$ ; **(d)**  $\hat{\gamma}_F$



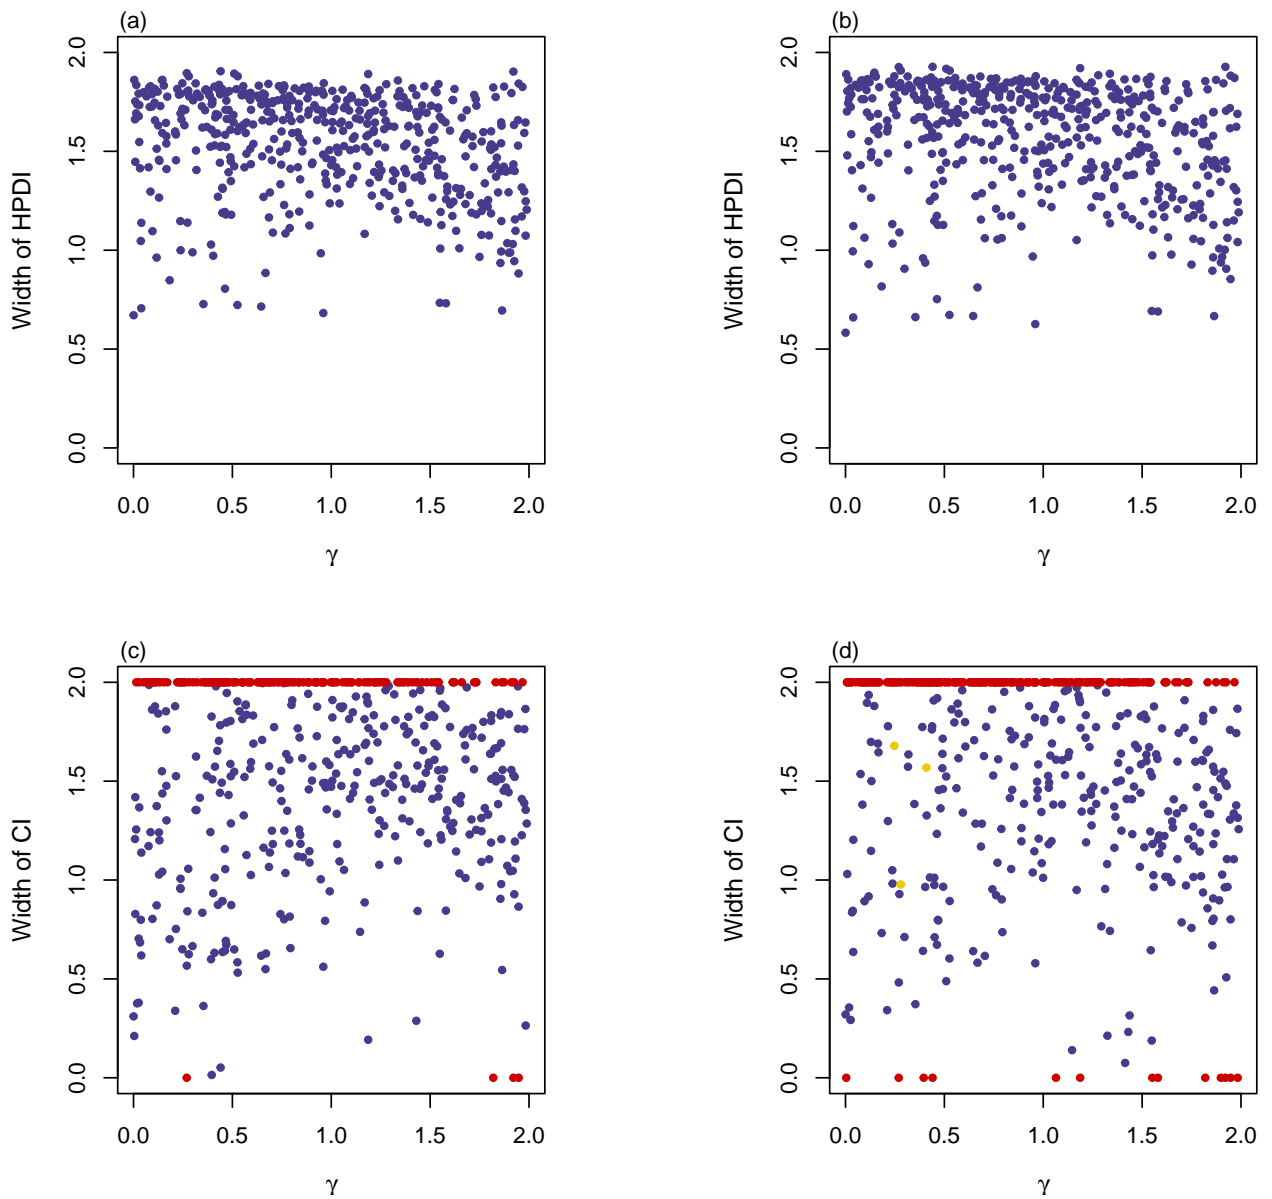

**Supplementary Figure S77** Widths of HPDIs or CIs for qualitative trait with a covariate when  $n = 500$ ,  $\text{MAF} = 0.3$  and  $\rho = 0$ . The results are against true value of  $\gamma$ . The red points represent the widths of the noninformative intervals or the empty sets, and the yellow points represent the widths of the discontinuous intervals. (a) BN method; (b) BU method; (c) PF method; (d) Fieller's method

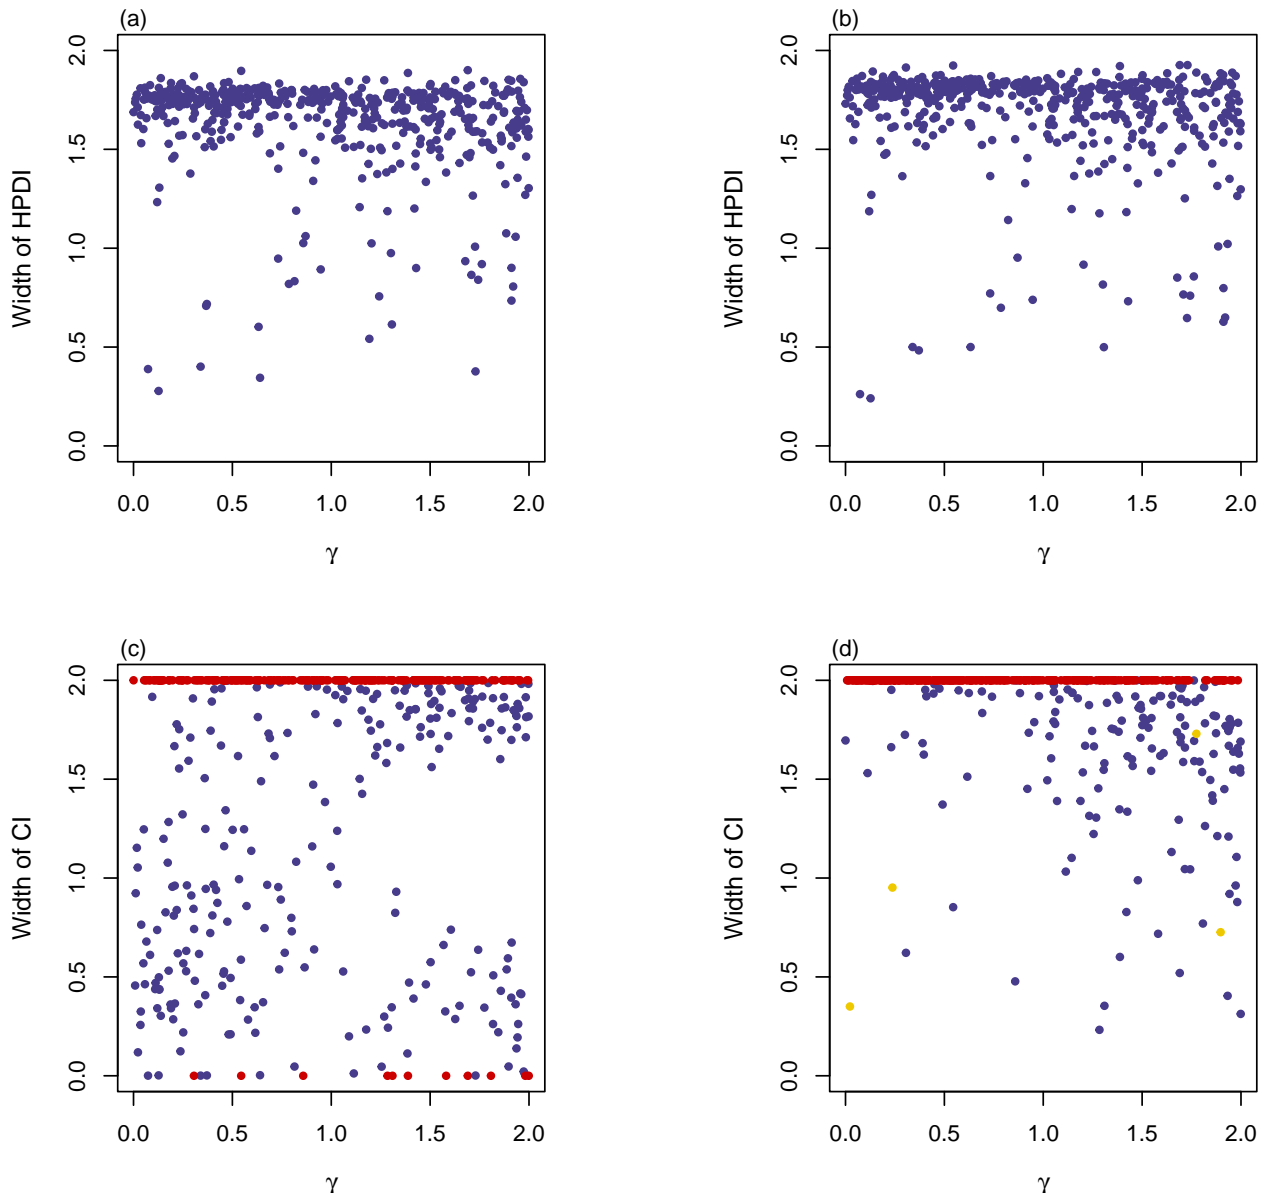

**Supplementary Figure S78** Widths of HPDIs or CIs for qualitative trait with a covariate when  $n = 500$ ,  $\text{MAF} = 0.1$  and  $\rho = 0$ . The results are against true value of  $\gamma$ . The red points represent the widths of the noninformative intervals or the empty sets, and the yellow points represent the widths of the discontinuous intervals. **(a)** BN method; **(b)** BU method; **(c)** PF method; **(d)** Fieller's method

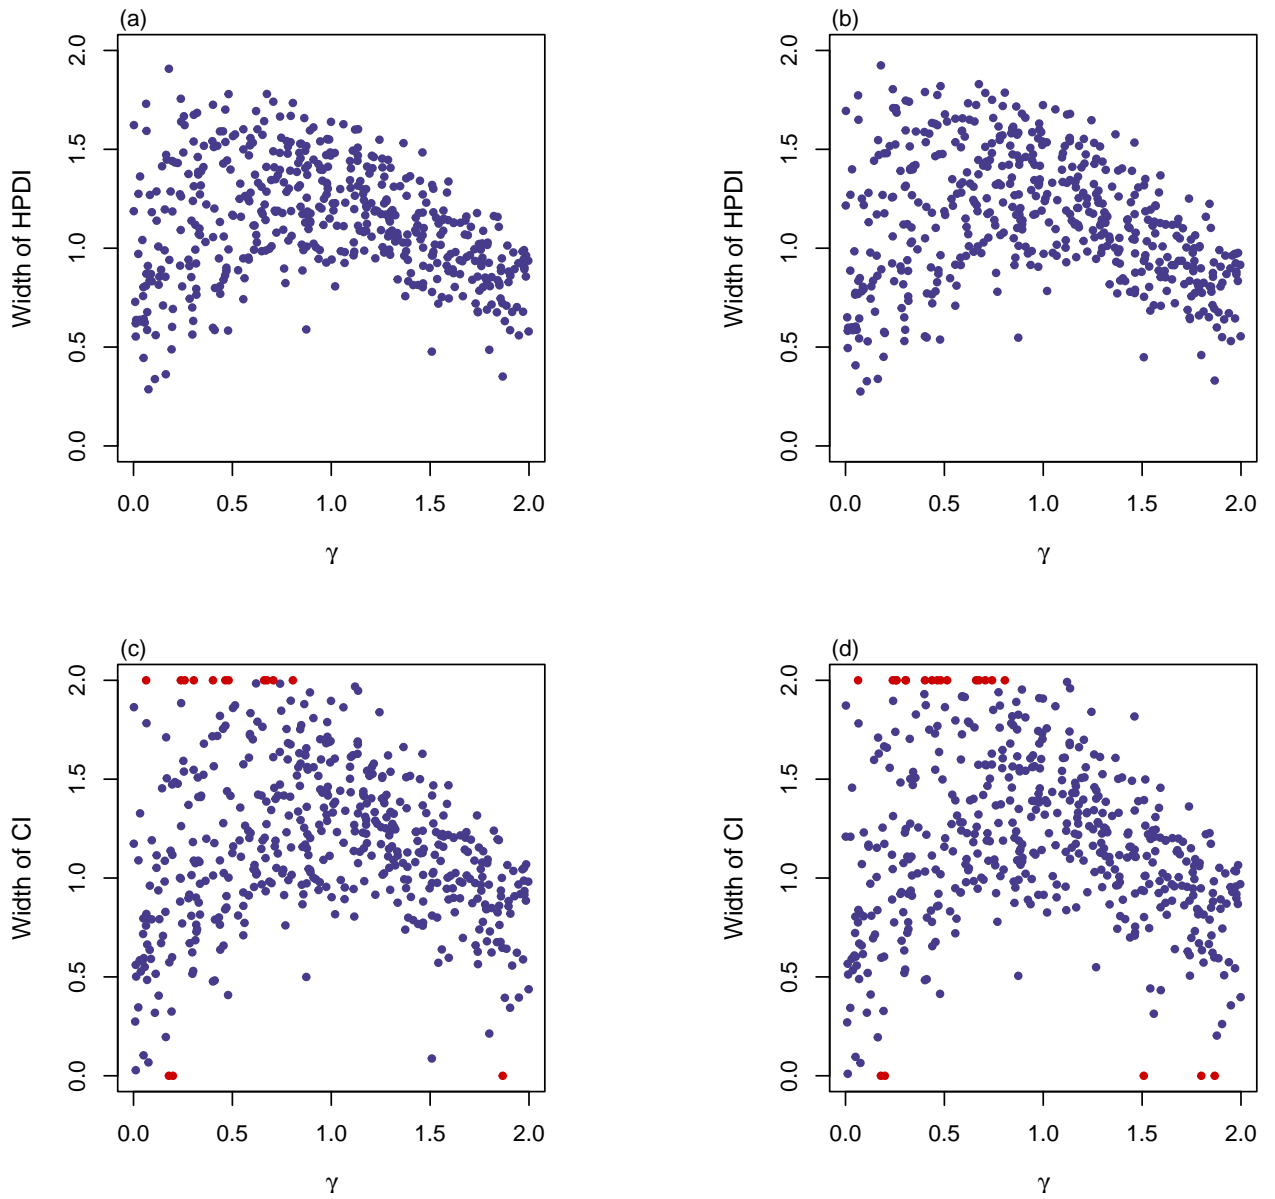

**Supplementary Figure S79** Widths of HPDIs or CIs for qualitative trait with a covariate when  $n = 2000$ ,  $MAF = 0.3$  and  $\rho = 0$ . The results are against true value of  $\gamma$ . The red points represent the widths of the noninformative intervals or the empty sets. **(a)** BN method; **(b)** BU method; **(c)** PF method; **(d)** Fieller's method

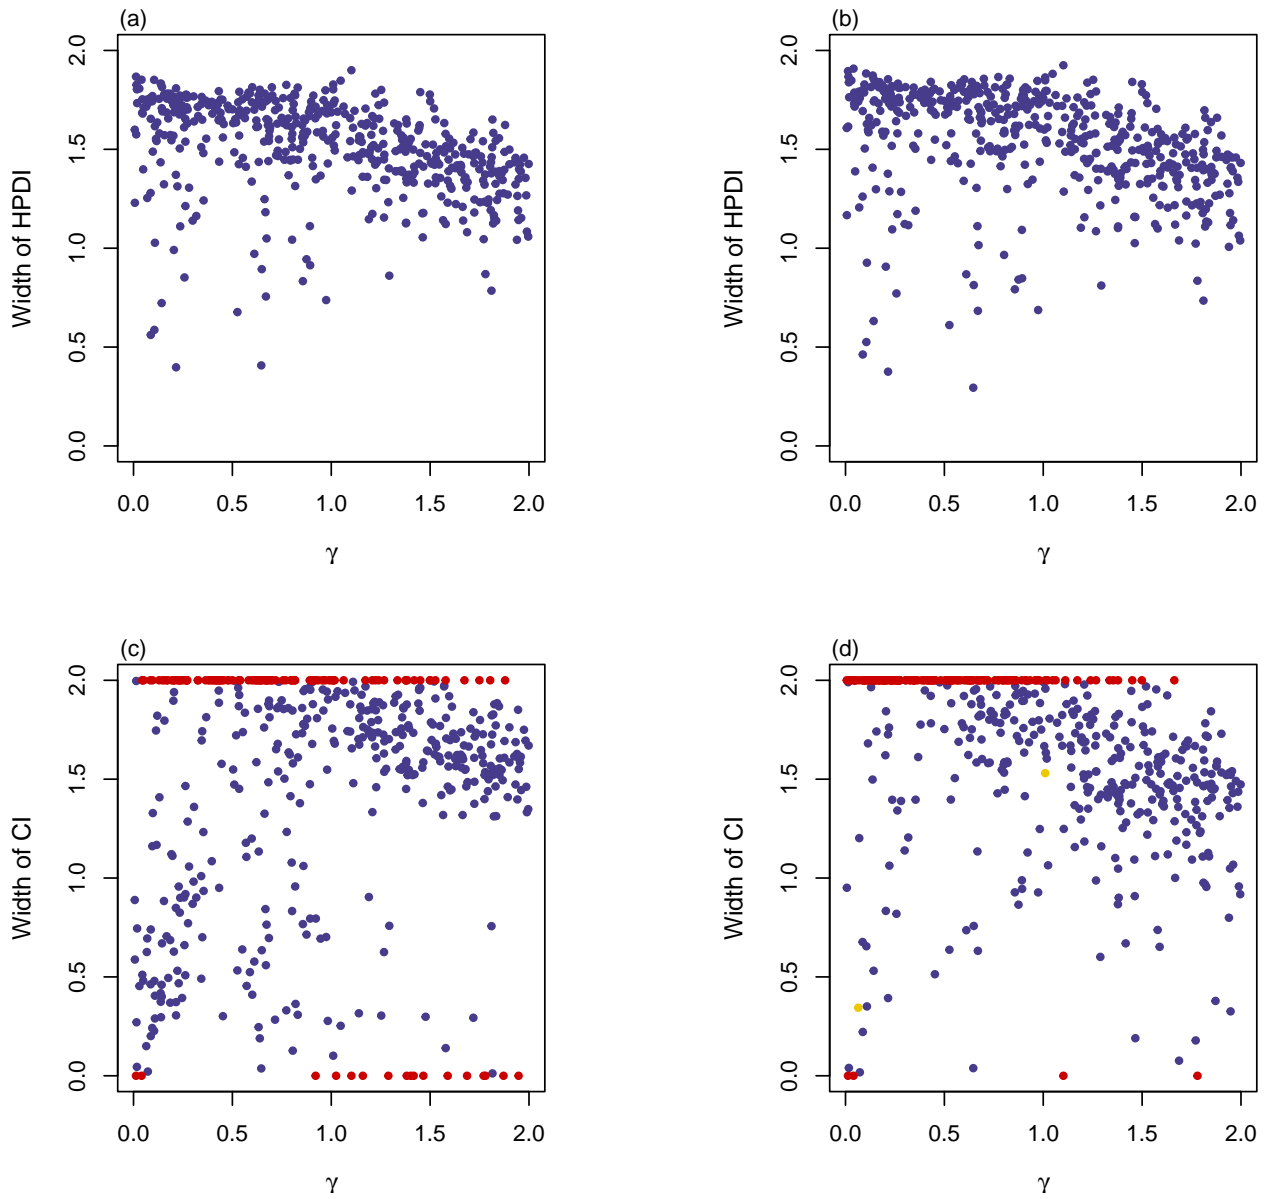

**Supplementary Figure S80** Widths of HPDIs or CIs for qualitative trait with a covariate when  $n = 2000$ ,  $MAF = 0.1$  and  $\rho = 0$ . The results are against true value of  $\gamma$ . The red points represent the widths of the noninformative intervals or the empty sets, and the yellow points represent the widths of the discontinuous intervals. (a) BN method; (b) BU method; (c) PF method; (d) Fieller's method

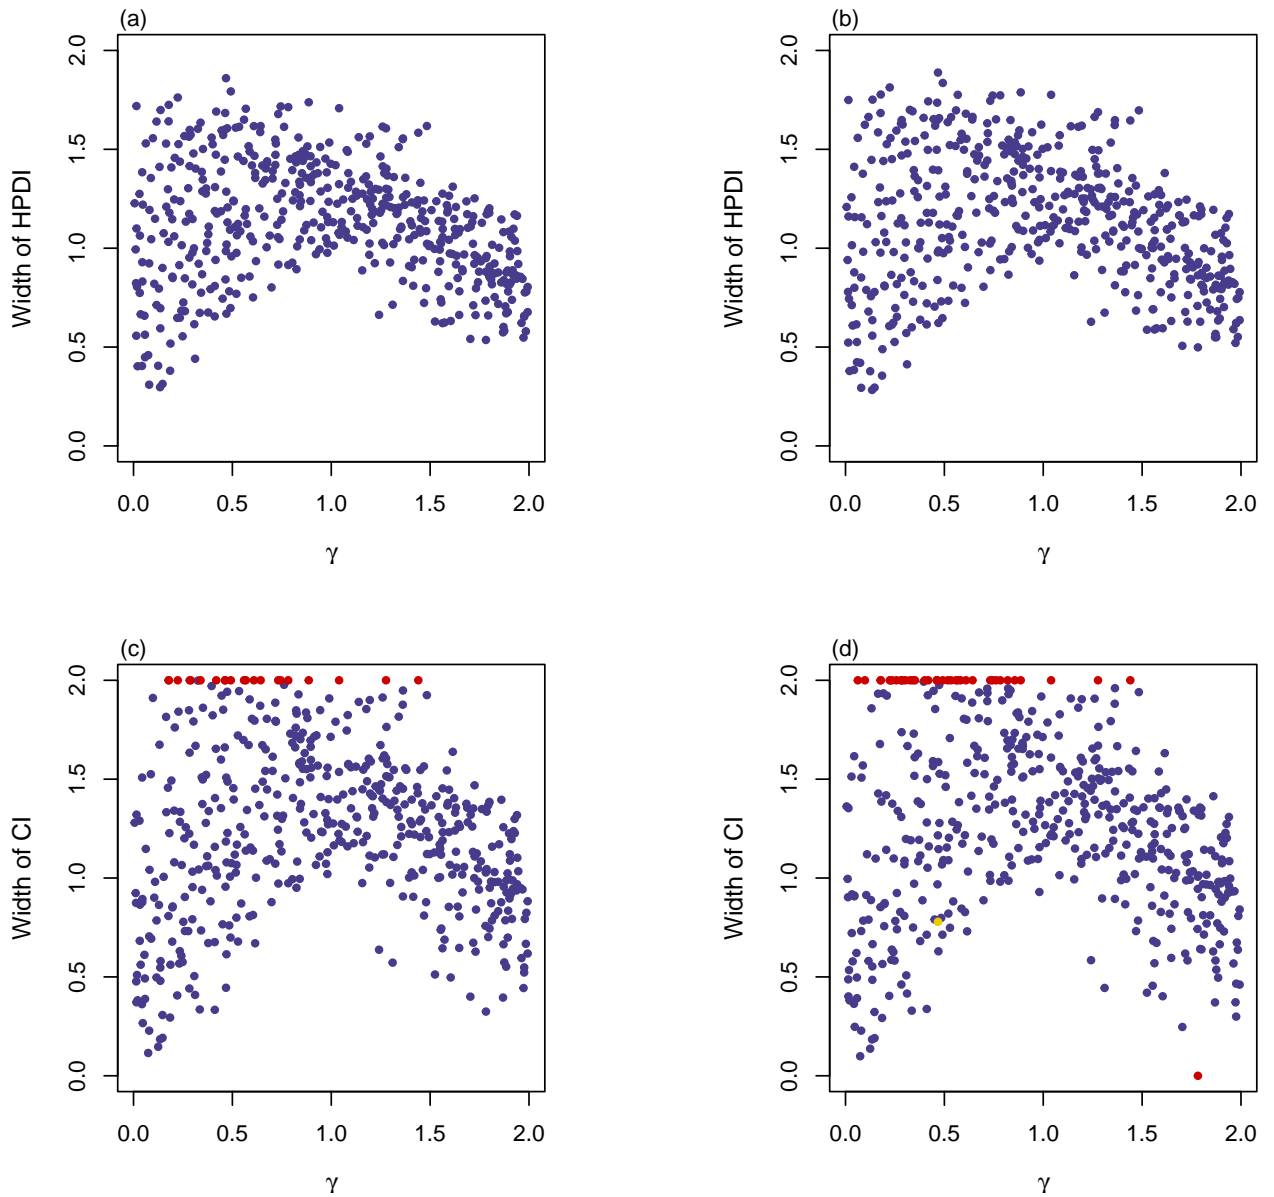

**Supplementary Figure S81** Widths of HPDIs or CIs for quantitative trait with a covariate when  $n = 500$ ,  $\text{MAF} = 0.3$  and  $\rho = 0$ . The results are against true value of  $\gamma$  with  $(\sigma_0^2, \sigma_1^2, \sigma_2^2) = (1, 1.2, 1)$ . The red points represent the widths of the noninformative intervals or the empty sets, and the yellow point represents the width of the discontinuous interval. (a) BN method; (b) BU method; (c) PF method; (d) Fieller's method

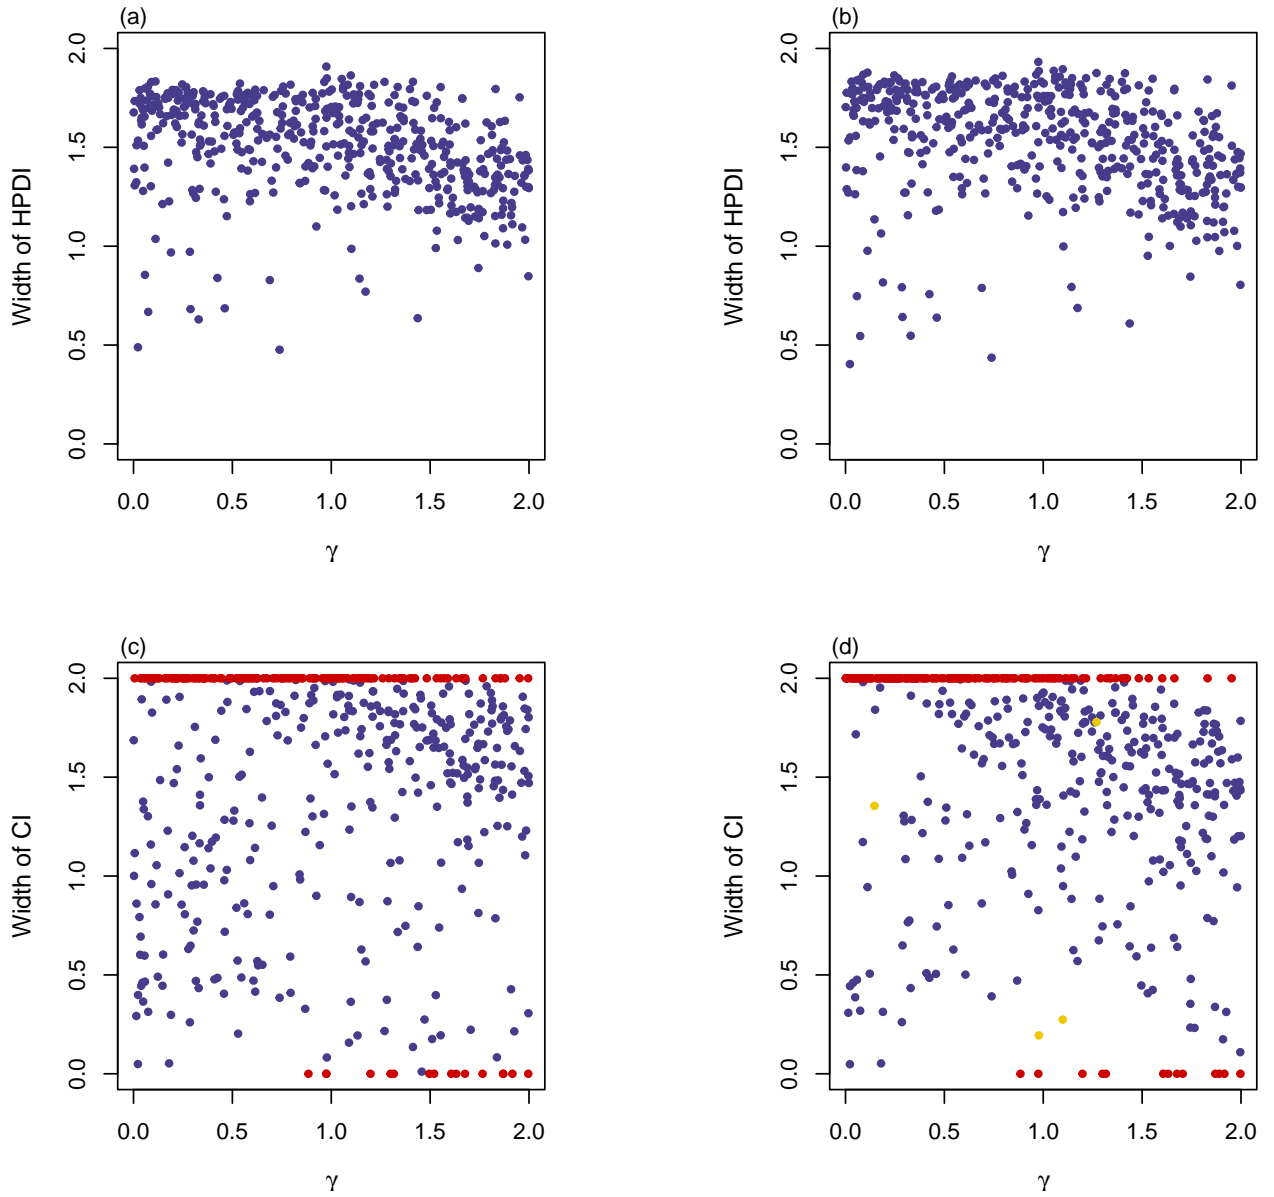

**Supplementary Figure S82** Widths of HPDIs or CIs for quantitative trait with a covariate when  $n = 500$ ,  $\text{MAF} = 0.1$  and  $\rho = 0$ . The results are against true value of  $\gamma$  with  $(\sigma_0^2, \sigma_1^2, \sigma_2^2) = (1, 1.2, 1)$ . The red points represent the widths of the noninformative intervals or the empty sets, and the yellow points represent the widths of the discontinuous intervals. **(a)** BN method; **(b)** BU method; **(c)** PF method; **(d)** Fieller's method

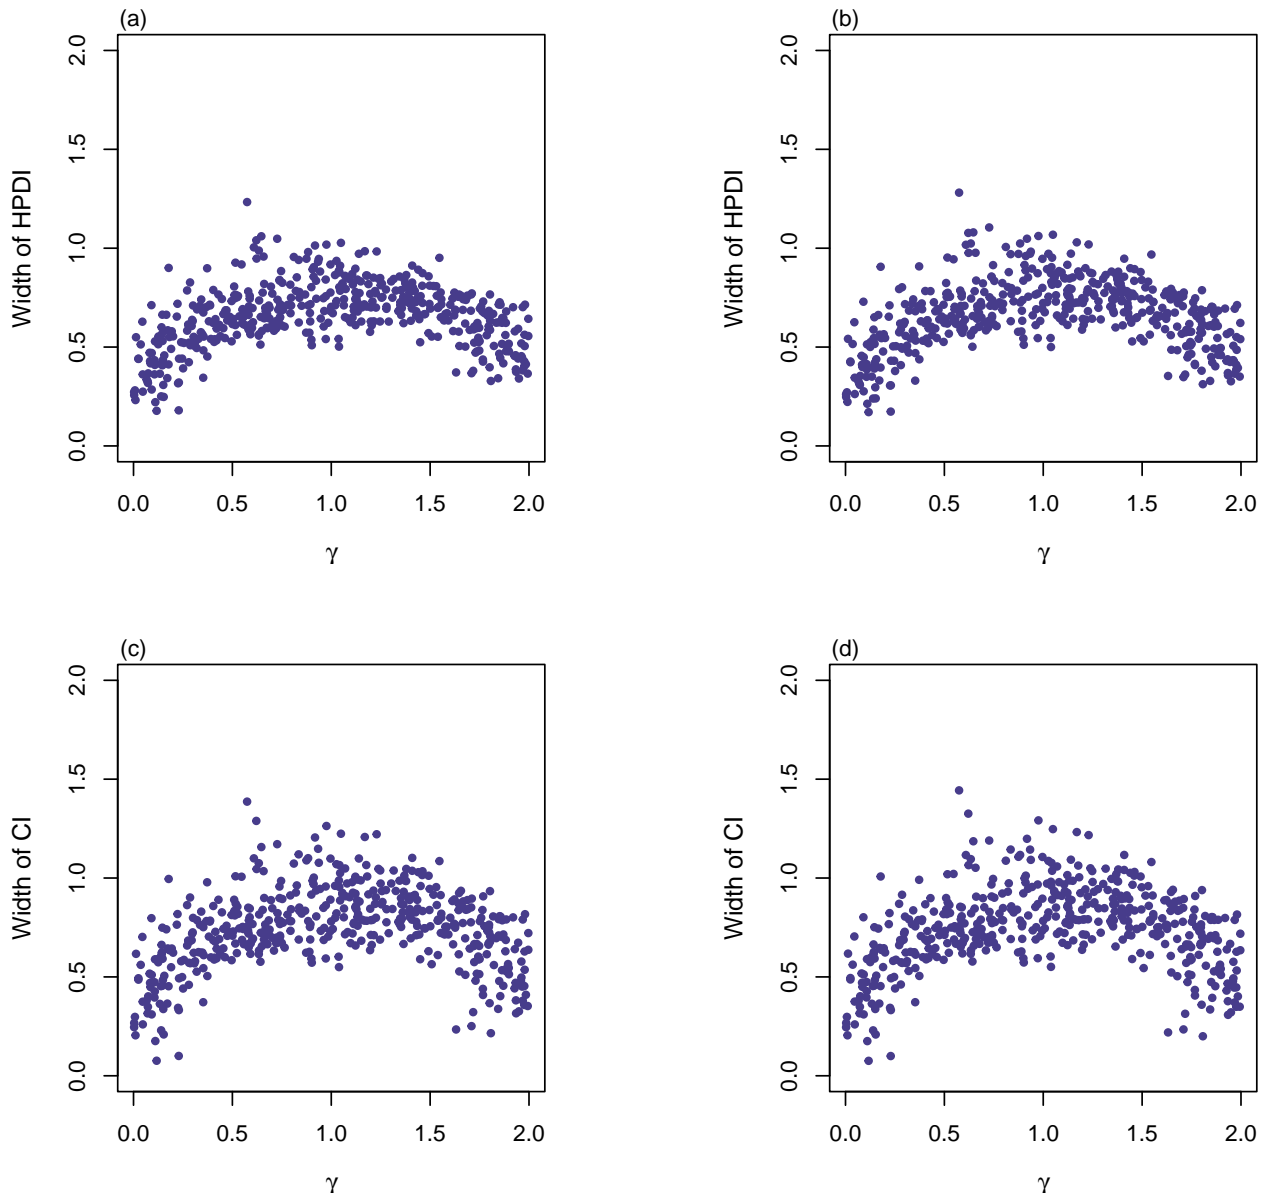

**Supplementary Figure S83** Widths of HPDIs or CIs for quantitative trait with a covariate when  $n = 2000$ ,  $MAF = 0.3$  and  $\rho = 0$ . The results are against true value of  $\gamma$  with  $(\sigma_0^2, \sigma_1^2, \sigma_2^2) = (1, 1.2, 1)$ . (a) BN method; (b) BU method; (c) PF method; (d) Fieller's method

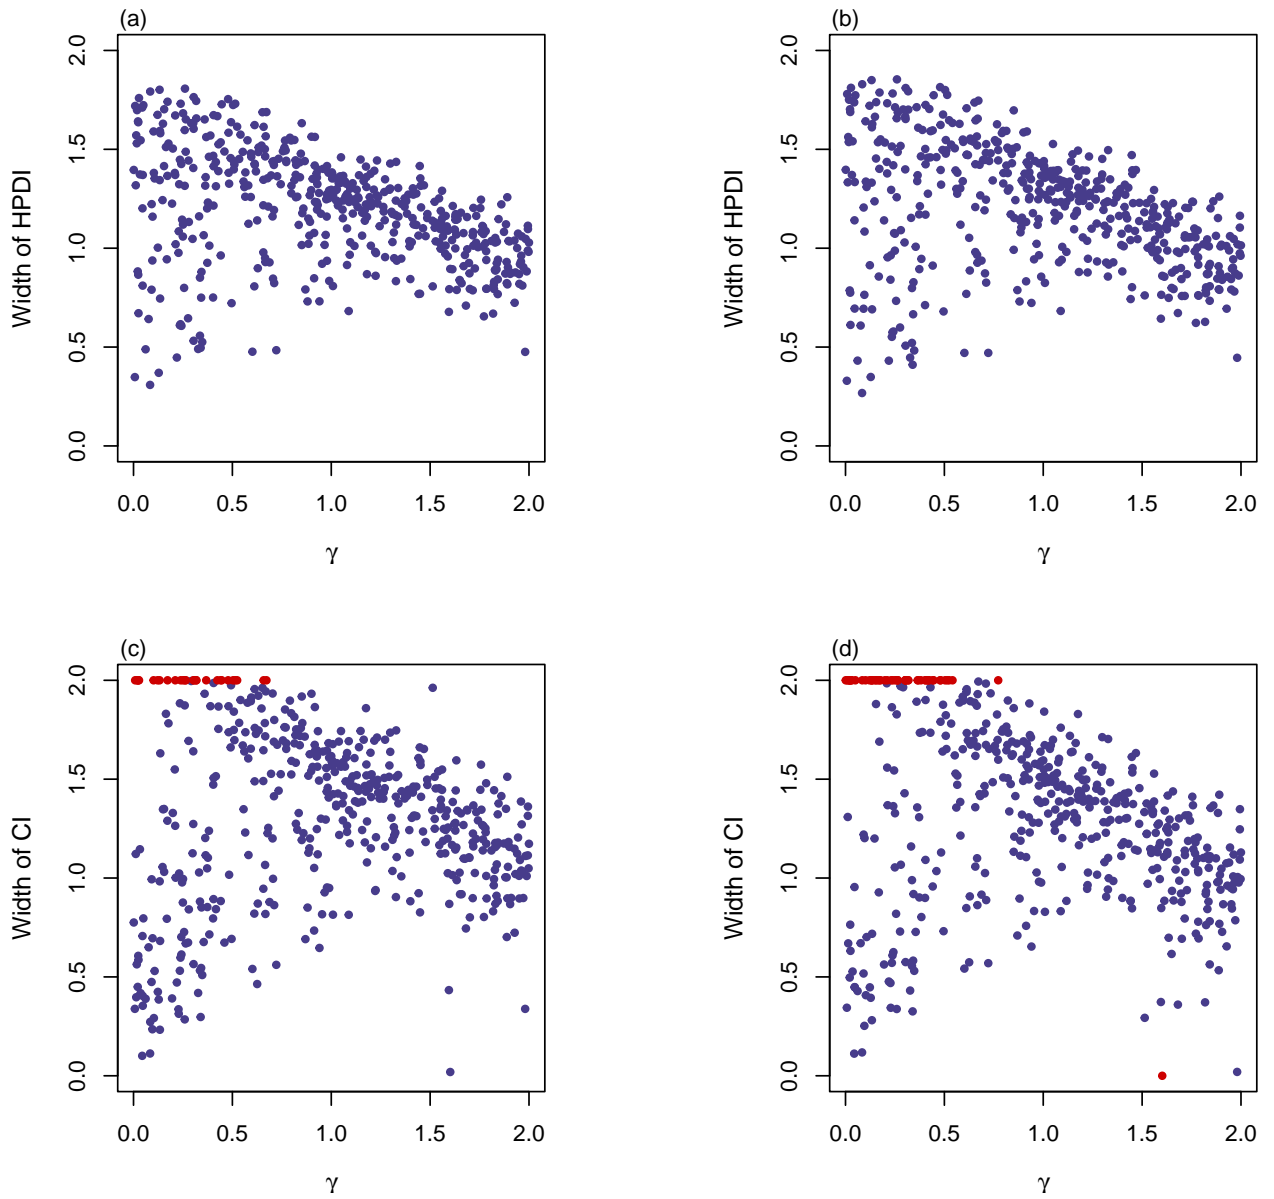

**Supplementary Figure S84** Widths of HPDIs or CIs for quantitative trait with a covariate when  $n = 2000$ ,  $\text{MAF} = 0.1$  and  $\rho = 0$ . The results are against true value of  $\gamma$  with  $(\sigma_0^2, \sigma_1^2, \sigma_2^2) = (1, 1.2, 1)$ . The red points represent the widths of the noninformative intervals or the empty sets. **(a)** BN method; **(b)** BU method; **(c)** PF method; **(d)** Fieller's method
